# Supplementary material for: Anionic Templates Drive Conversion between a ZnII9L6 Tricapped Trigonal Prism and ZnII6L4 Pseudo-Octahedra
Source: PubMed Central journal article supplement (PMC10375523; doi:10.1021/jacs.3c03981), 2023-07-13
Supplement: ja3c03981_si_001.pdf [file ja3c03981_si_001.pdf]

# Anionic Templates Drive Conversion Between a $Zn^{II}_9L_6$ Tricapped Trigonal Prism and $Zn^{II}_6L_4$ Pseudo-Octahedra

Hua-Kui Liu, Tanya K. Ronson, Kai Wu, Dong Luo, Jonathan R. Nitschke\*

Yusuf Hamied Department of Chemistry, University of Cambridge,

Cambridge CB2 1EW, UK.

jrn34@cam.ac.uk

## Supporting Information

### Table of Contents

|     |                                                                           |     |
|-----|---------------------------------------------------------------------------|-----|
| 1   | General Information .....                                                 | S3  |
| 2   | Synthesis and Characterization of <b>A</b> .....                          | S4  |
| 3   | Self-Assembly and Characterization of Cages <b>1</b> and <b>2</b> .....   | S8  |
| 3.1 | Self-Assembly and Characterization of Cage <b>1</b> .....                 | S8  |
| 3.2 | Self-Assembly and Characterization of Cage <b>2</b> .....                 | S15 |
| 4   | Conversion of $Zn^{II}_9L_6$ to $Zn^{II}_6L_4$ .....                      | S24 |
| 4.1 | Templates Exploration to Convert $Zn^{II}_9L_6$ into $Zn^{II}_6L_4$ ..... | S24 |
| 4.2 | Trianionic Dodecatungstophosphate as a Template.....                      | S25 |
| 4.3 | Dianionic 4,4'-Dinitrostilbene-2,2'-disulfonate as a Template .....       | S28 |
| 5   | NMR Titrations of Guests with Cage <b>1</b> .....                         | S39 |
| 5.1 | Job Plot of NMR Titrations .....                                          | S39 |
| 5.2 | Hill Equation Analyses of NMR Titrations .....                            | S42 |
| 6   | Host-guest Studies Using Cage <b>1</b> .....                              | S48 |
| 6.1 | Binding Guests for Cage <b>1</b> .....                                    | S48 |
| 6.2 | Non-binding Guests for Cage <b>1</b> .....                                | S50 |
| 7   | Contrast of Octahedra with Low or High Symmetry .....                     | S51 |

---

|    |                                                                                                                                   |     |
|----|-----------------------------------------------------------------------------------------------------------------------------------|-----|
| 8  | X-ray Crystallography .....                                                                                                       | S53 |
| 9  | Volume Calculations .....                                                                                                         | S56 |
| 10 | Optimized Structures of Zn <sup>II</sup> <sub>6</sub> L <sub>4</sub> and Zn <sup>II</sup> <sub>9</sub> L <sub>6</sub> Cages ..... | S57 |
| 11 | References.....                                                                                                                   | S89 |

## 1 General Information

Unless otherwise specified, all reagents were purchased from commercial sources and used as received. **A** was prepared from commercially available 1,3,5-tris(4,4,5,5-tetramethyl-1,3,2-dioxaborolan-2-yl) benzene and 4-bromopicolinaldehyde. Self-assembly reactions were performed in either deuterated or distilled CH<sub>3</sub>CN.

NMR spectra were recorded using the following NMR spectrometers: Bruker 400 MHz Avance III HD smart probe (<sup>1</sup>H, and <sup>1</sup>H–DOSY), Bruker Avance 500 MHz DCH cryoprobe (<sup>1</sup>H, <sup>13</sup>C, and 2D NMR) or Bruker Avance 500 MHz TCI cryoprobe (<sup>1</sup>H NMR). Chemical shifts of the NMR spectra are reported relative to the residual CHCl<sub>3</sub> in CDCl<sub>3</sub> (<sup>1</sup>H NMR:  $\delta$  = 7.26 ppm, <sup>13</sup>C NMR:  $\delta$  = 77.0 ppm), or CHD<sub>2</sub>CN (<sup>1</sup>H NMR:  $\delta$  = 1.94 ppm, <sup>13</sup>C NMR:  $\delta$  = 118.3 ppm). Data for <sup>1</sup>H NMR spectra were reported as follows: chemical shift (ppm), peak shape (s = singlet, d = doublet, m = multiplet), coupling constant (Hz), and integration. Data for <sup>1</sup>H NMR and <sup>13</sup>C NMR are reported in terms of chemical shift (ppm).

High resolution electrospray ionization mass spectra (HR–ESI–MS) were recorded on a Waters Synapt G2-Si instrument.

## 2 Synthesis and Characterization of A

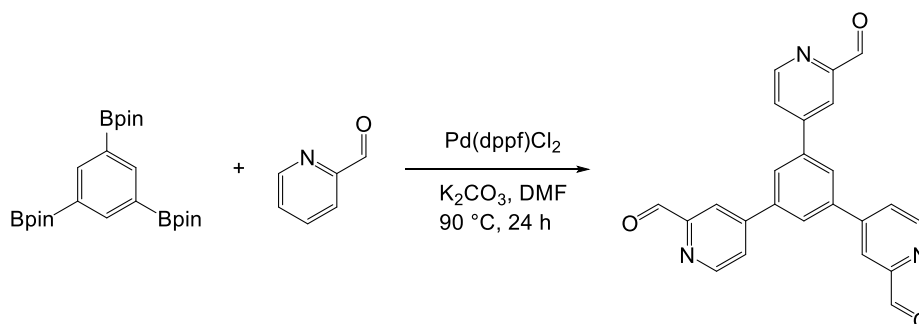

A suspension of 1,3,5-tris(4,4,5,5-tetramethyl-1,3,2-dioxaborolan-2-yl)benzene (0.47 g, 1.03 mmol, 1.0 equiv), 4-bromopicolinaldehyde (0.97 g, 5.2 mmol, 5 equiv), K<sub>2</sub>CO<sub>3</sub> (1.70 g, 16 mmol, 15.5 equiv) and Pd(dppf)Cl<sub>2</sub> (0.25 g, 0.34 mmol, 0.34 equiv) in dimethylformamide (DMF, 60 mL) was degassed under a stream of nitrogen for 20 min.<sup>1</sup> The reaction mixture was heated at 90 °C for 24 hours under nitrogen. After cooling to room temperature, DMF was evaporated under reduced pressure. Brine (50 mL) was then added, and the suspension was extracted with CH<sub>2</sub>Cl<sub>2</sub> (3 × 50 mL). The combined organic phases were dried over anhydrous Na<sub>2</sub>SO<sub>4</sub>, filtered, and the solvents evaporated under reduced pressure. Purification by flash column chromatography on silica gel using CH<sub>2</sub>Cl<sub>2</sub>/MeOH = 40/1 – 20/1 as eluent afforded **A** as a brown solid (0.25 g, 62%). R<sub>f</sub> = 0.3 (MeOH/CH<sub>2</sub>Cl<sub>2</sub> = 20/1).

**<sup>1</sup>H NMR** (500 MHz, CDCl<sub>3</sub>): δ 10.20 (s, 9H), 8.95 (d, *J* = 5.5 Hz, 1H), 8.29 (s, 1H), 8.05 (s, 1H), 7.87 (d, *J* = 5.5 Hz, 1H).

**<sup>13</sup>C NMR** (125 MHz, CDCl<sub>3</sub>): δ 193.2, 153.7, 151.1, 148.2, 139.8, 126.9, 125.7, 119.5.

**HR-ESI-MS**: *m/z* = 394.1187, [M+H]<sup>+</sup>, (calc. 394.1186).



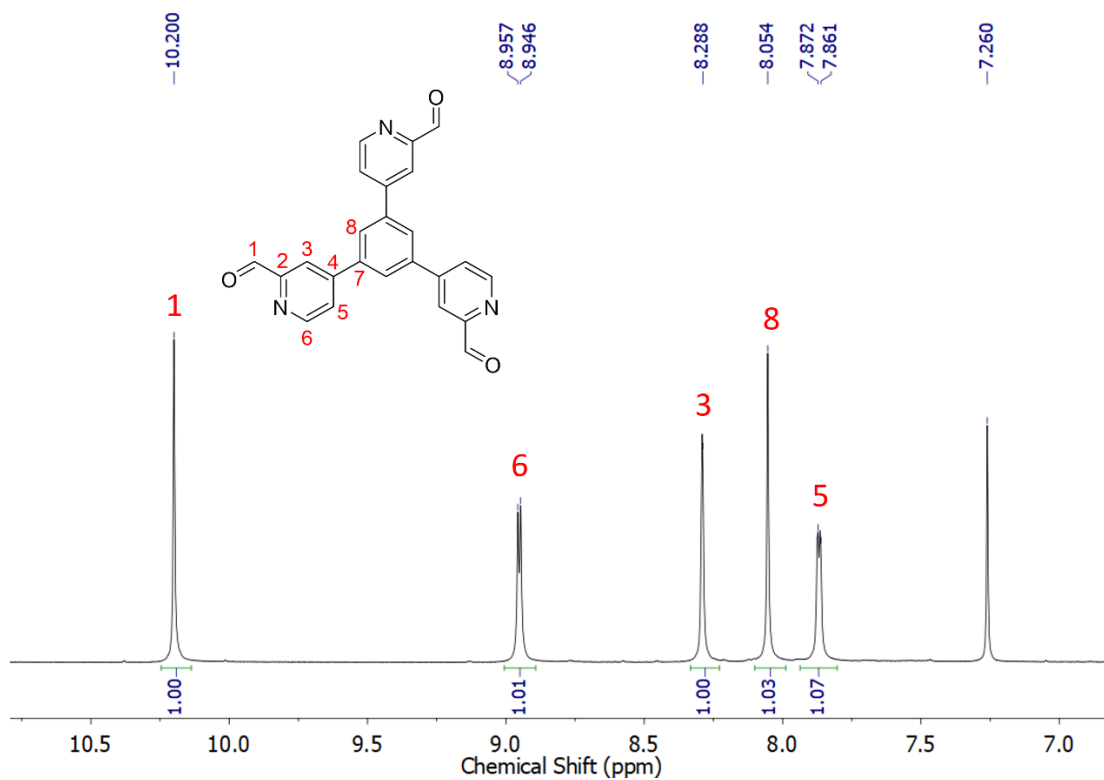

**Figure S1.** <sup>1</sup>H NMR spectrum of **A** (500 MHz, CDCl<sub>3</sub>, 298 K).

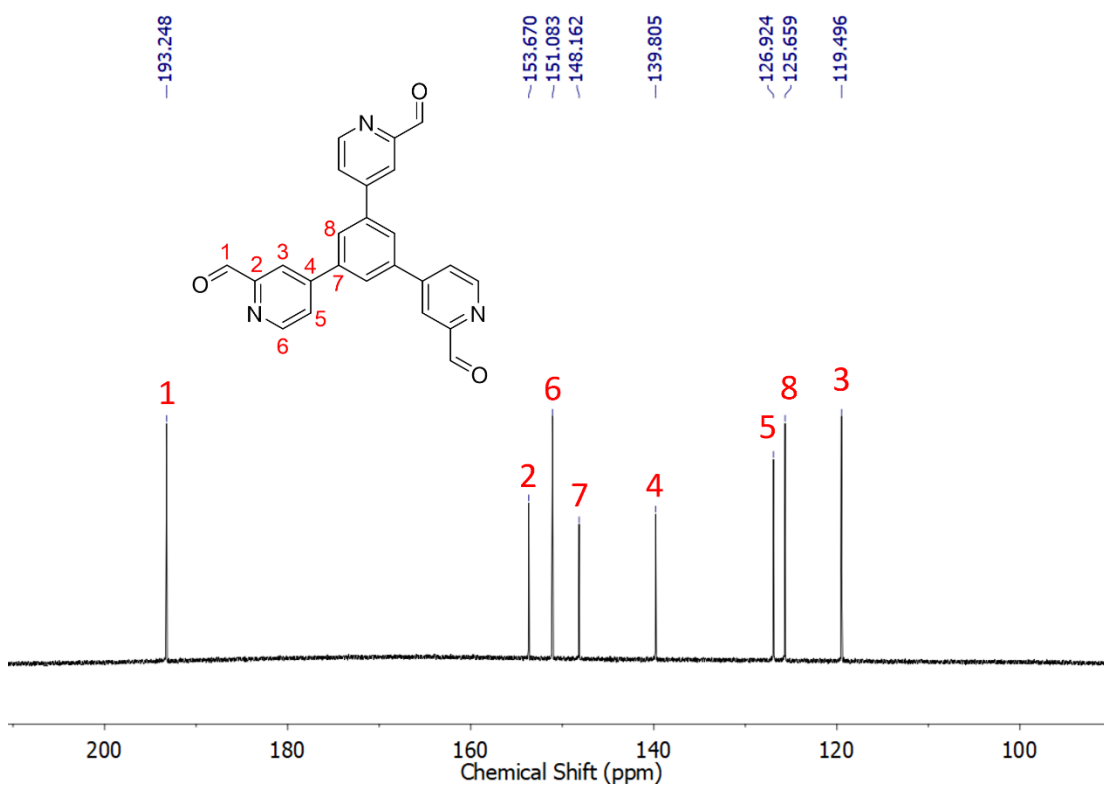

**Figure S2.** <sup>13</sup>C NMR spectrum of **A** (125 MHz, CDCl<sub>3</sub>, 298 K).

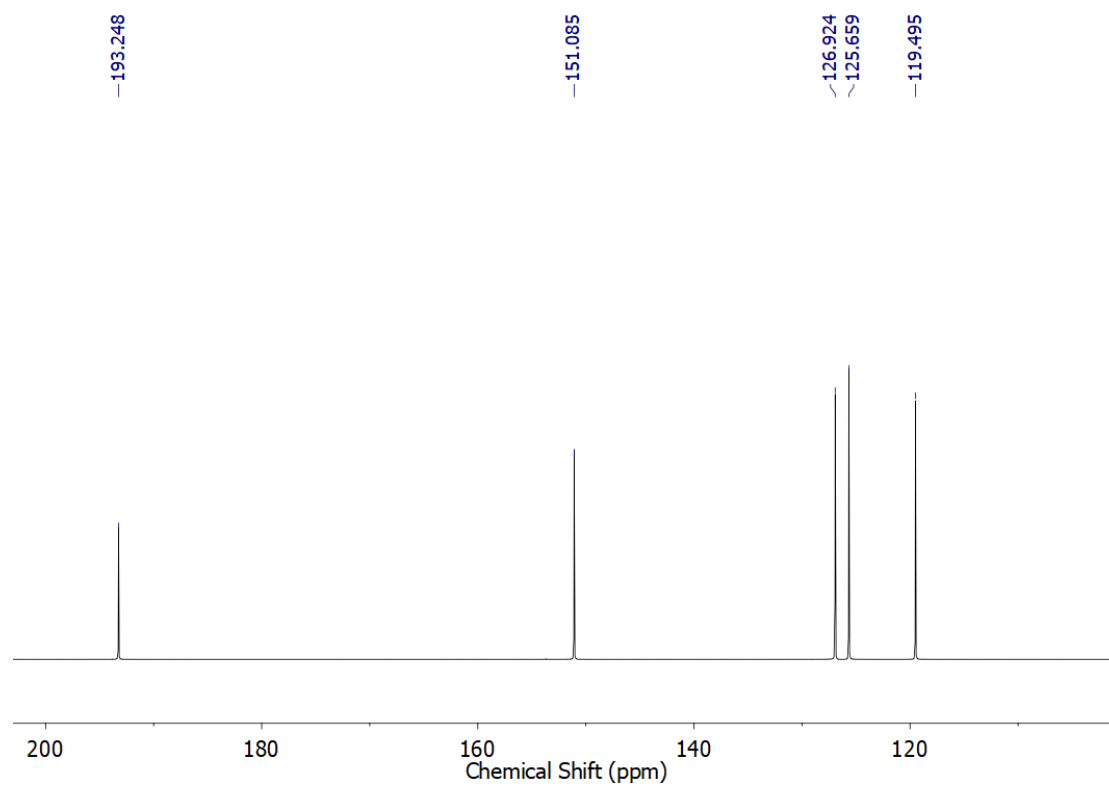

**Figure S3.**  $^{13}\text{C}$  DEPT-135 NMR spectrum of **A** (125 MHz,  $\text{CDCl}_3$ , 298 K).

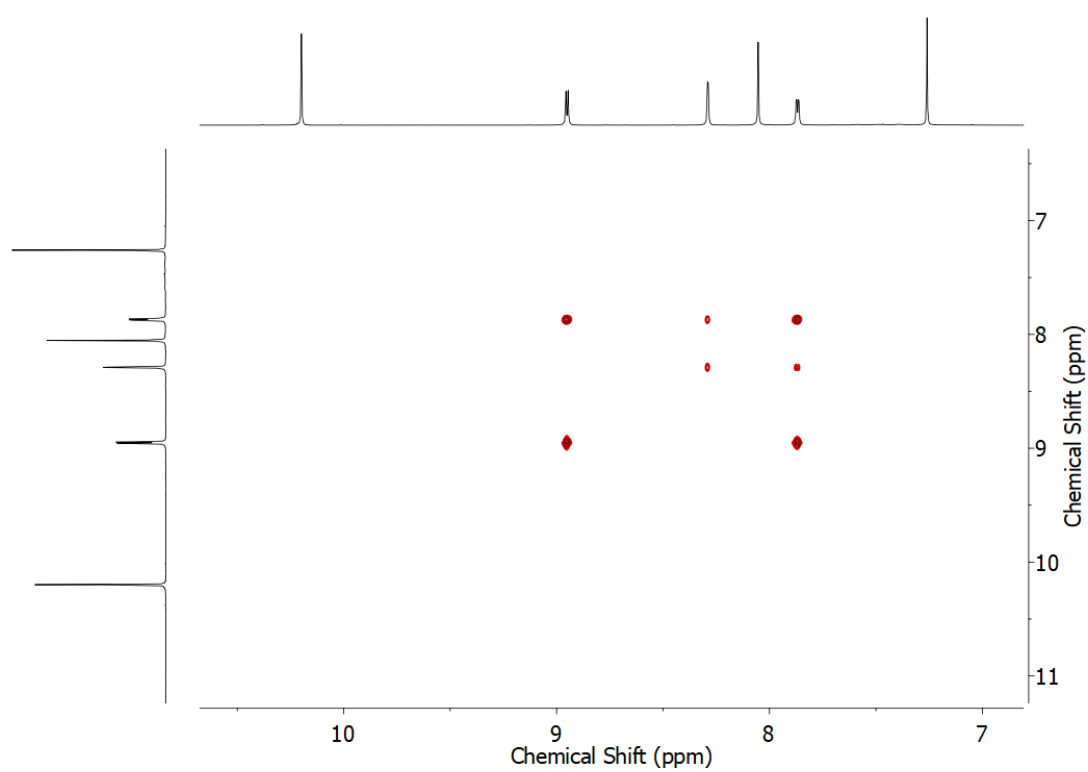

**Figure S4.**  $^1\text{H}$ - $^1\text{H}$  COSY NMR spectrum of **A** (500 MHz,  $\text{CDCl}_3$ , 298 K).

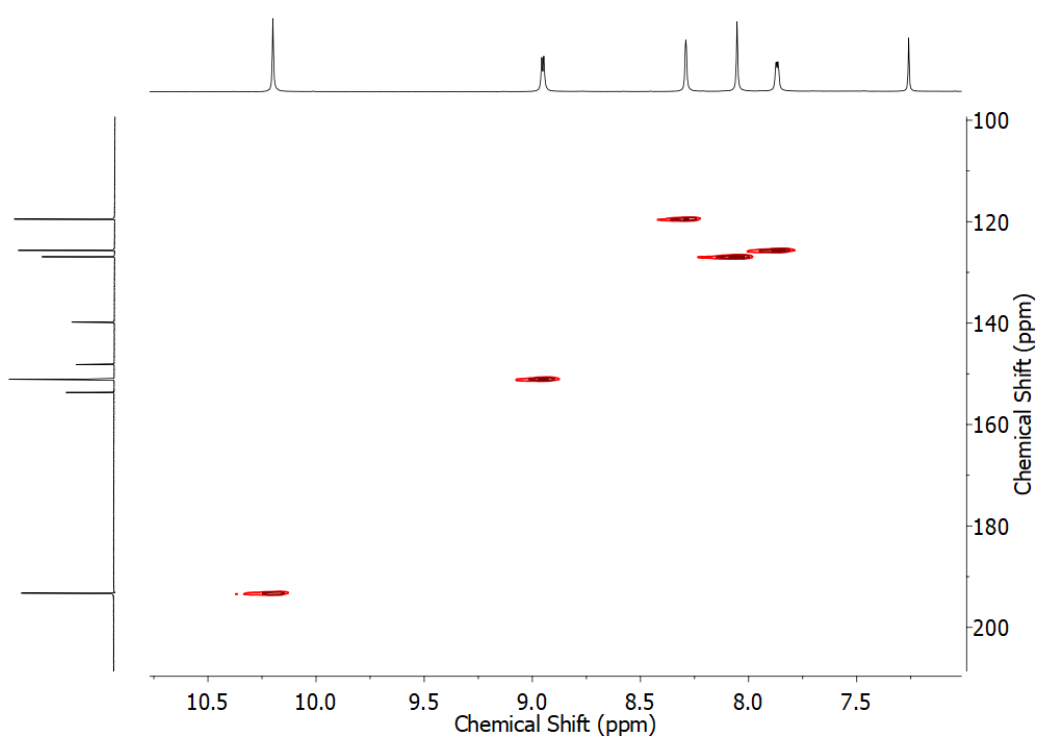

**Figure S5.**  $^1\text{H}$ - $^{13}\text{C}$  HSQC NMR spectrum of **A** (500 MHz,  $\text{CDCl}_3$ , 298 K).

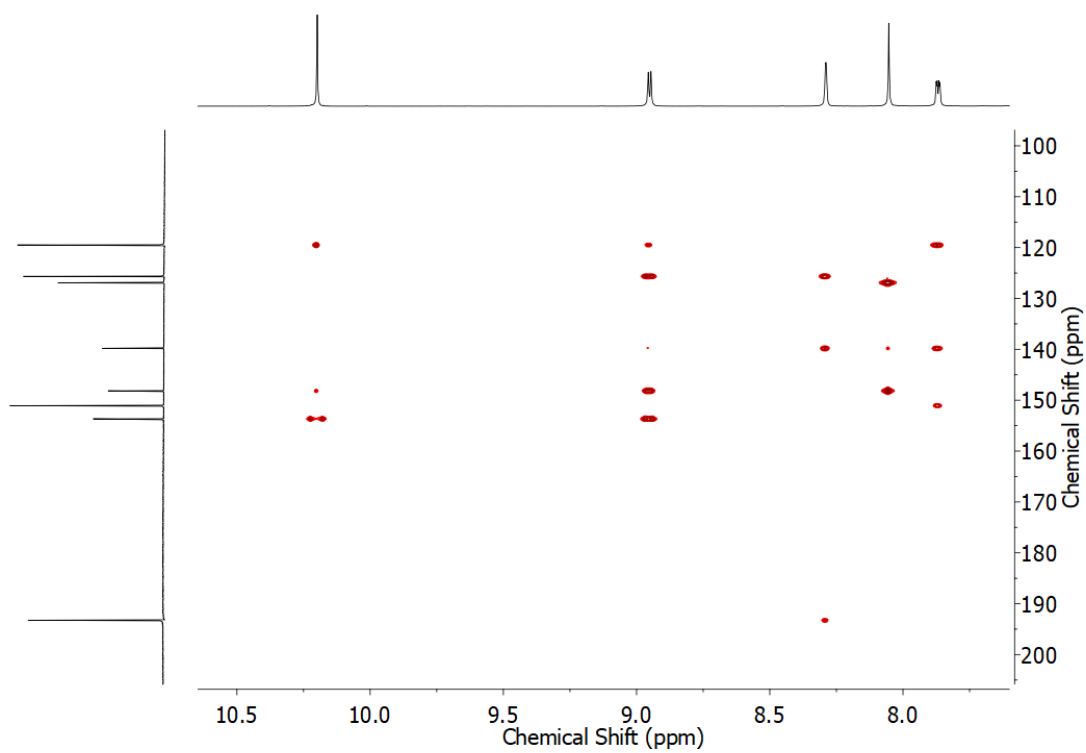

**Figure S6.**  $^1\text{H}$ - $^{13}\text{C}$  HMBC NMR spectrum of **A** (500 MHz,  $\text{CDCl}_3$ , 298 K).

### 3 Self-Assembly and Characterization of Cages 1 and 2

#### 3.1 Self-Assembly and Characterization of Cage 1

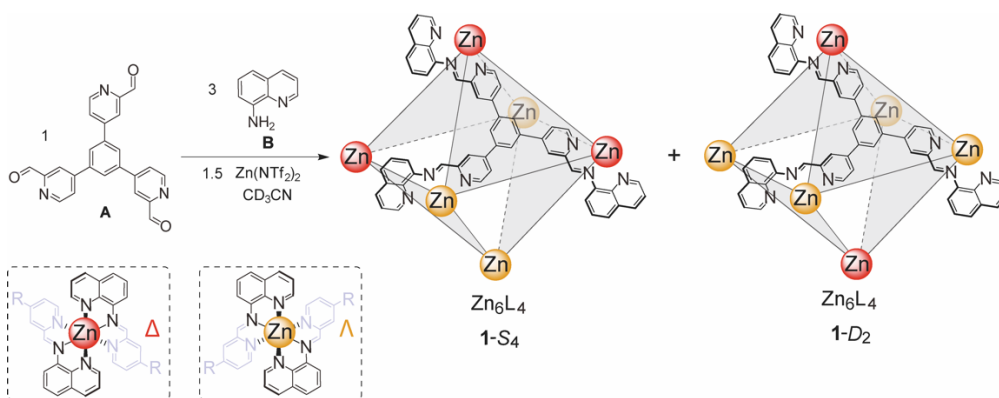

**A** (23.67 mg, 0.06 mmol, 4 equiv), 8-aminoquinoline (25.95 mg, 0.18 mmol, 12 equiv) and  $Zn(NTf_2)_2$  (56.34 mg, 0.09 mmol, 6 equiv) were combined in  $CH_3CN$  (15 mL) in a 50 mL tube. The reaction mixture was sealed and stirred at 70 °C for 5 hours. The solvent was reduced to 0.7 mL, and  $Et_2O$  (30 mL) was then added. The precipitate was collected by centrifugation and washed with excess  $Et_2O$ , affording cage **1** as a dark brown solid (84.41 mg, 82%).

**<sup>1</sup>H NMR** (500 MHz,  $CD_3CN$ ):  $\delta$  10.05 (s, 0.5H), 10.03 (s, 1H), 10.00 (s, 0.5H), 9.99 (s, 1H), 9.72 (s, 0.5H), 9.69 (s, 1H), 8.96–8.79 (m, 5.5H), 8.68–8.47 (m, 9H), 8.46–8.29 (m, 8.5H), 8.28–8.18 (m, 4.5H), 8.17–8.09 (m, 4.5H), 8.09–7.96 (m, 4.5H), 7.76–7.72 (m, 1.5H), 7.70–7.62 (m, 3.0H), 7.60–7.57 (dd,  $J = 8.0, 4.5$  Hz, 1.0H), 7.53–7.50 (m, 1.0H), 7.50–7.47 (m, 1.0H), 7.46–7.43 (m, 1.0H).

**<sup>13</sup>C NMR** (125 MHz,  $CD_3CN$ ):  $\delta$  157.9, 157.8, 157.8, 152.1, 151.5, 151.4, 151.2, 151.1, 151.0, 150.3, 149.9, 149.8, 148.9, 148.8, 148.8, 148.7, 148.6, 141.4, 141.3, 141.3, 139.0, 138.4, 136.1, 135.99, 135.95, 132.7, 132.6, 132.5, 132.4, 130.7, 130.7, 130.6, 129.22, 129.16, 129.1, 129.0, 128.7, 128.6, 128.5, 128.3, 127.9, 127.5, 124.6, 124.5, 122.1, 120.6, 120.5, 119.5.

**HR-ESI-MS**:  $m/z = 575.0298$ , [**1**·( $NTf_2$ )<sub>4</sub>]<sup>8+</sup>, (calc. 575.0555); 697.1657, [**1**·( $NTf_2$ )<sub>5</sub>]<sup>7+</sup>, (calc. 697.2275); 860.1801, [**1**·( $NTf_2$ )<sub>6</sub>]<sup>6+</sup>, (calc. 860.1236); 1088.2021, [**1**·( $NTf_2$ )<sub>7</sub>]<sup>5+</sup>, (calc. 1088.1781); 1430.2286, [**1**·( $NTf_2$ )<sub>8</sub>]<sup>4+</sup>, (calc. 1430.2599).

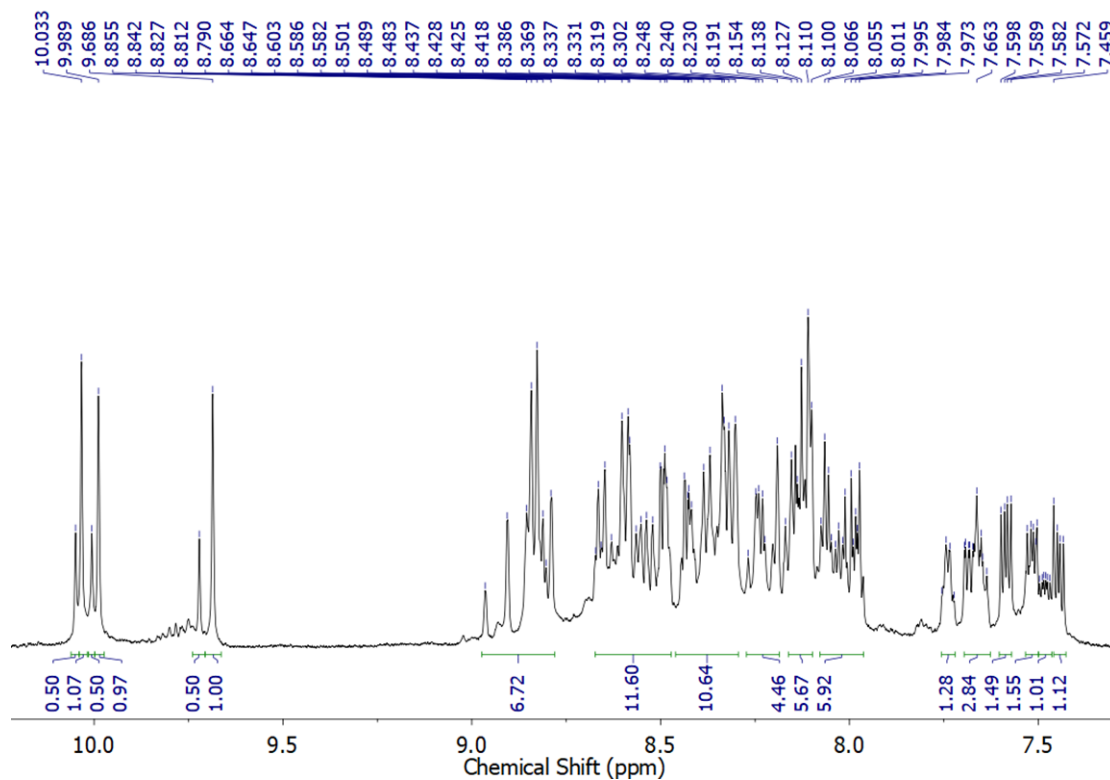

**Figure S7.** <sup>1</sup>H NMR spectrum of cage 1 (500 MHz, CD<sub>3</sub>CN, 298 K) with the integrals of peaks shown.

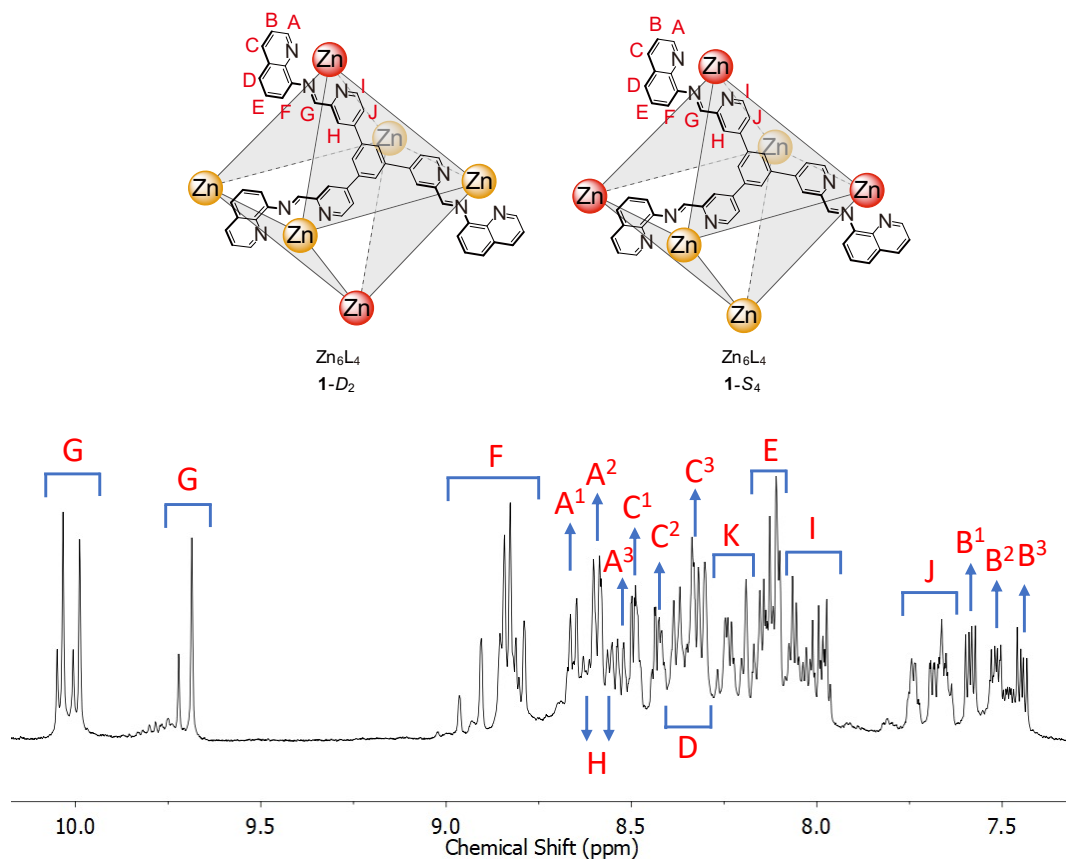

**Figure S8.** <sup>1</sup>H NMR spectrum of cage 1 (500 MHz, CD<sub>3</sub>CN, 298 K) with the assignment of protons shown.

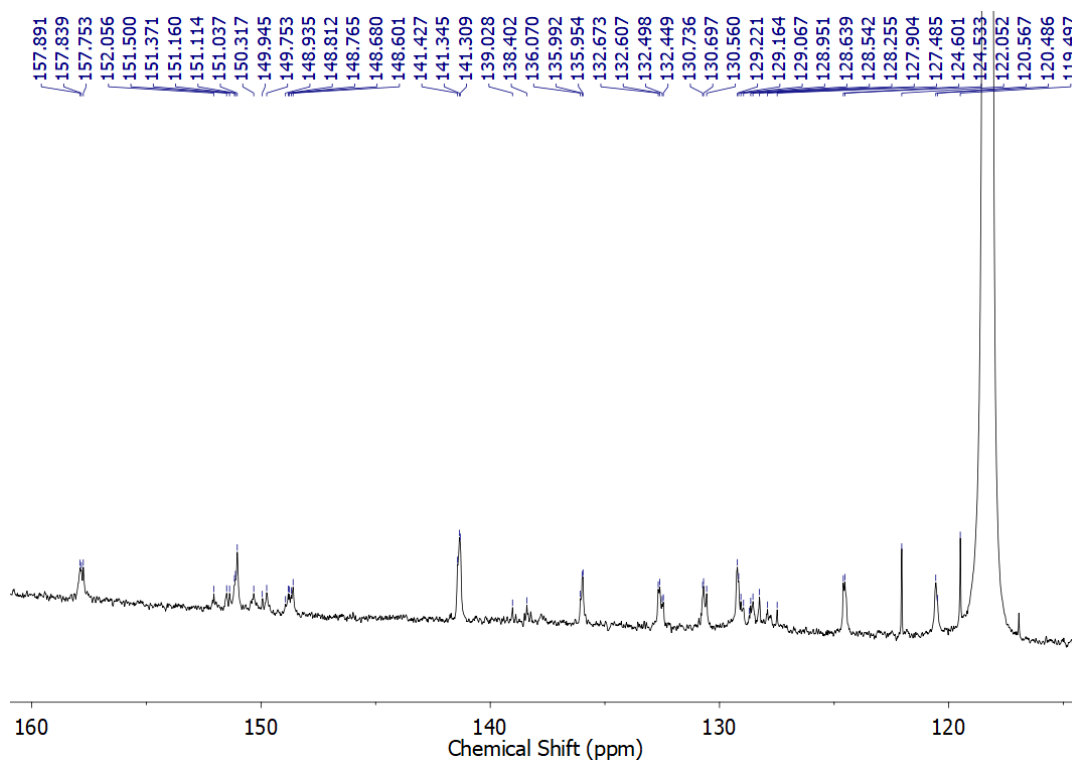

**Figure S9.**  $^{13}\text{C}$  NMR spectrum of cage 1 (125 MHz,  $\text{CD}_3\text{CN}$ , 298 K).

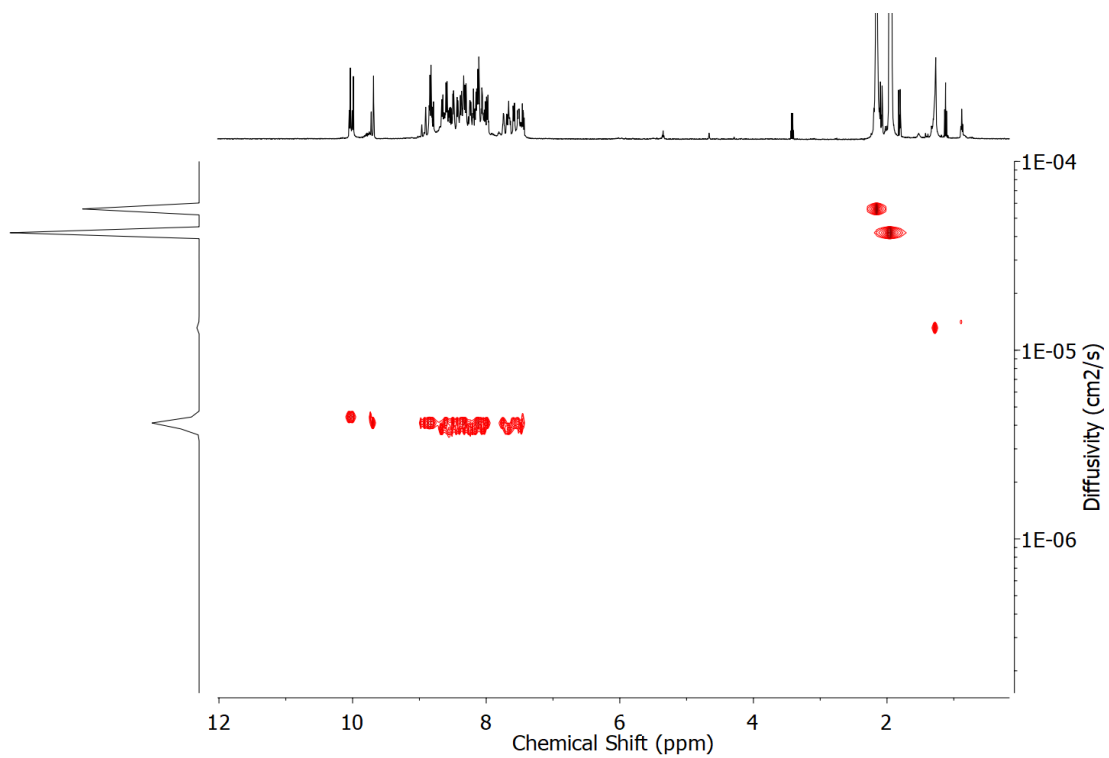

**Figure S10.**  $^1\text{H}$  DOSY NMR spectrum of cage 1 (400 MHz,  $\text{CD}_3\text{CN}$ , 298 K). The diffusion coefficient for both diastereomers was measured to be  $4.05 \times 10^{-6} \text{ cm}^2/\text{s}$ .

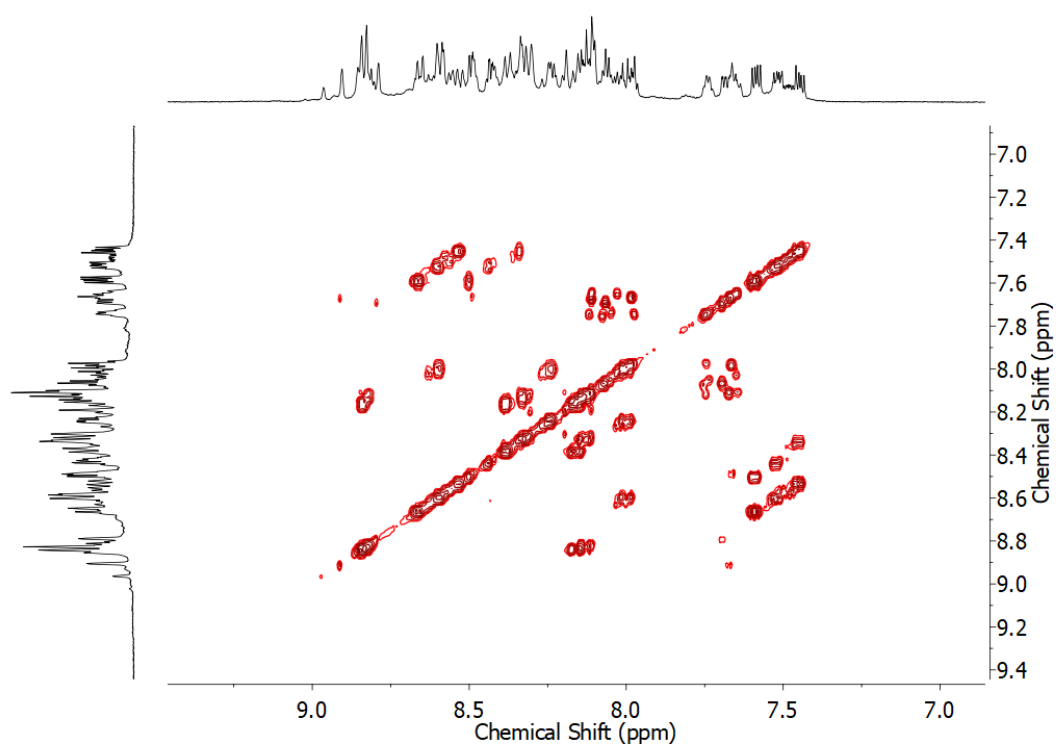

**Figure S11.**  $^1\text{H}$ - $^1\text{H}$  COSY NMR spectrum of cage **1** (500 MHz,  $\text{CD}_3\text{CN}$ , 298 K).

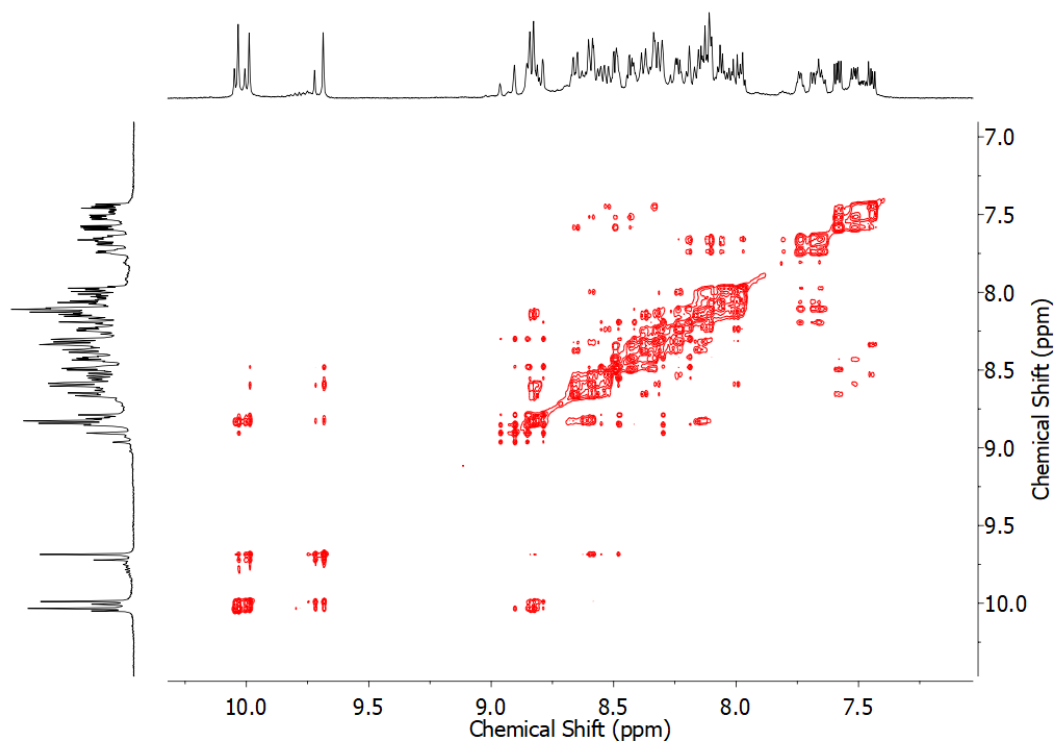

**Figure S12.**  $^1\text{H}$ - $^1\text{H}$  NOESY NMR spectrum of cage **1** (500 MHz,  $\text{CD}_3\text{CN}$ , 298 K).

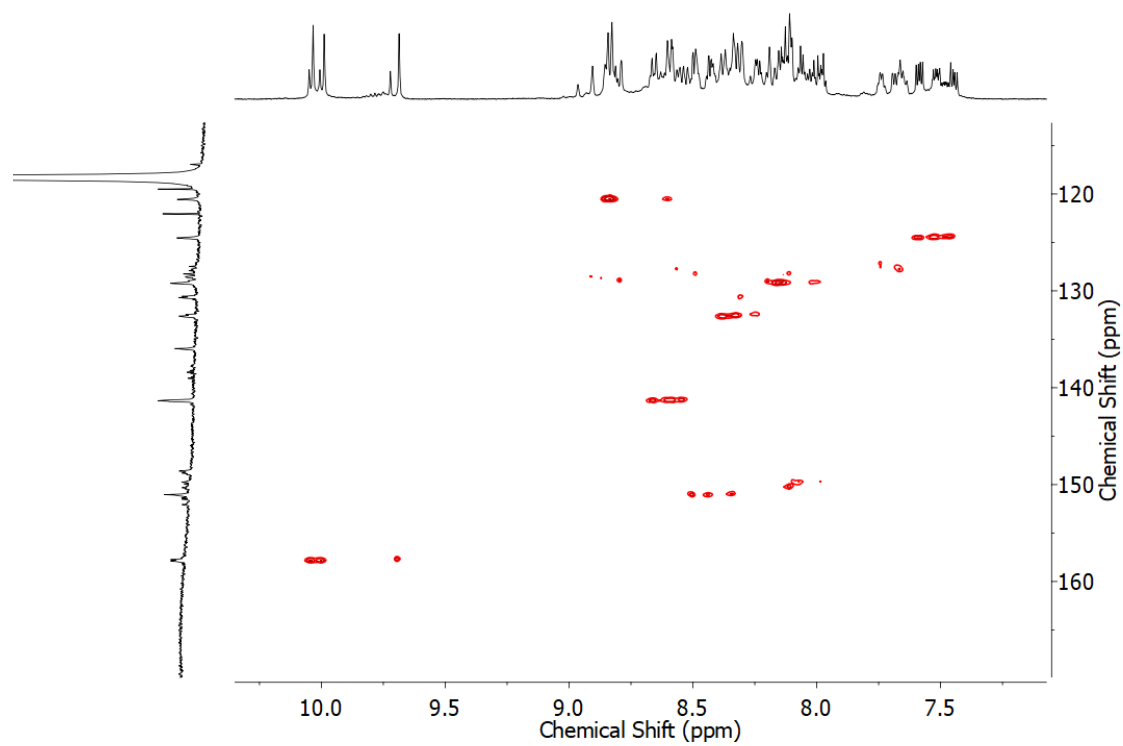

**Figure S13.**  $^1\text{H}$ - $^{13}\text{C}$  HSQC NMR spectrum of cage **1** (500 MHz,  $\text{CD}_3\text{CN}$ , 298 K).

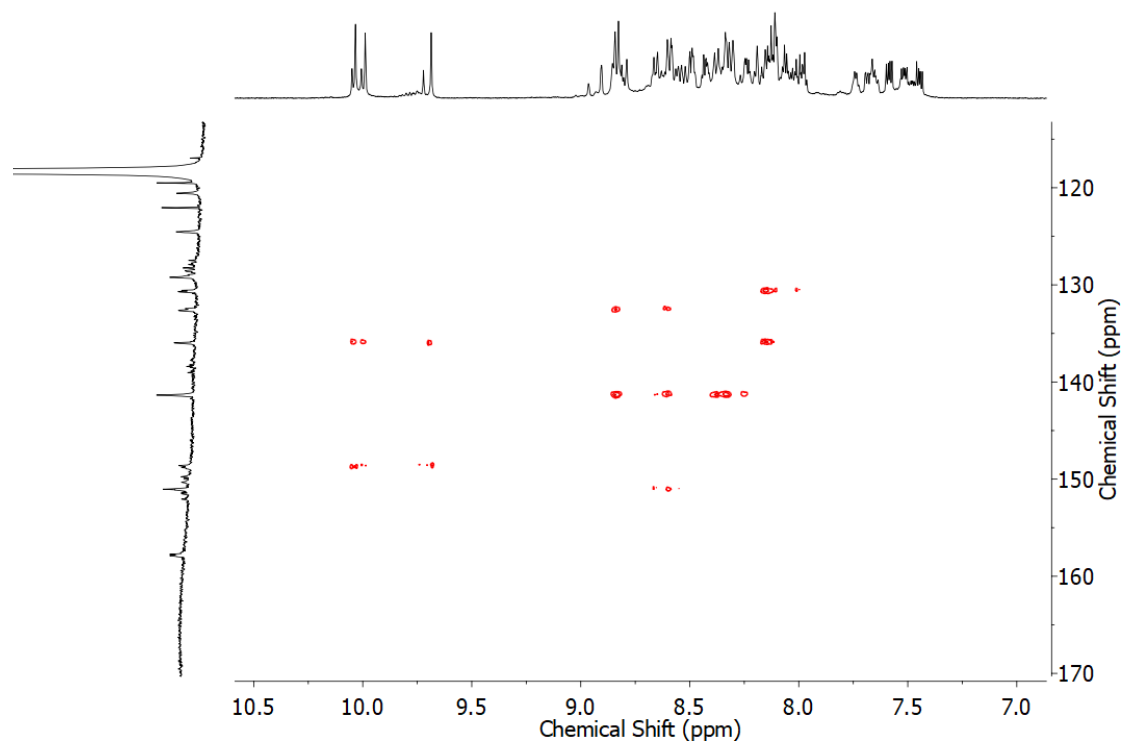

**Figure S14.**  $^1\text{H}$ - $^{13}\text{C}$  HMBC NMR spectrum of cage **1** (500 MHz,  $\text{CD}_3\text{CN}$ , 298 K).



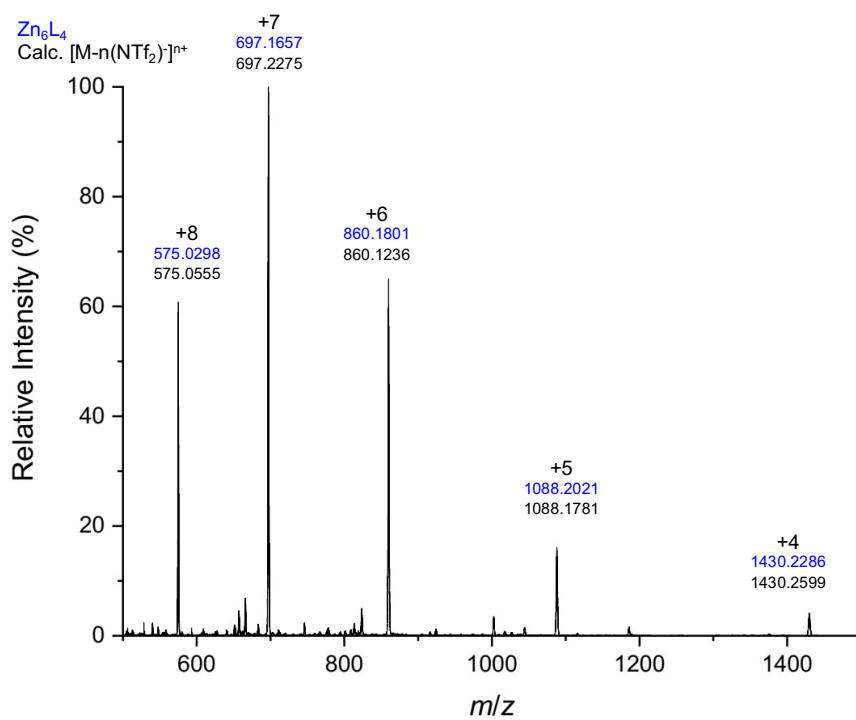

**Figure S15.** HR-ESI-MS spectrum of cage **1** in  $CH_3CN$ . Experimental (blue) and calculated (black)  $m/z$  values for each charge state are shown.

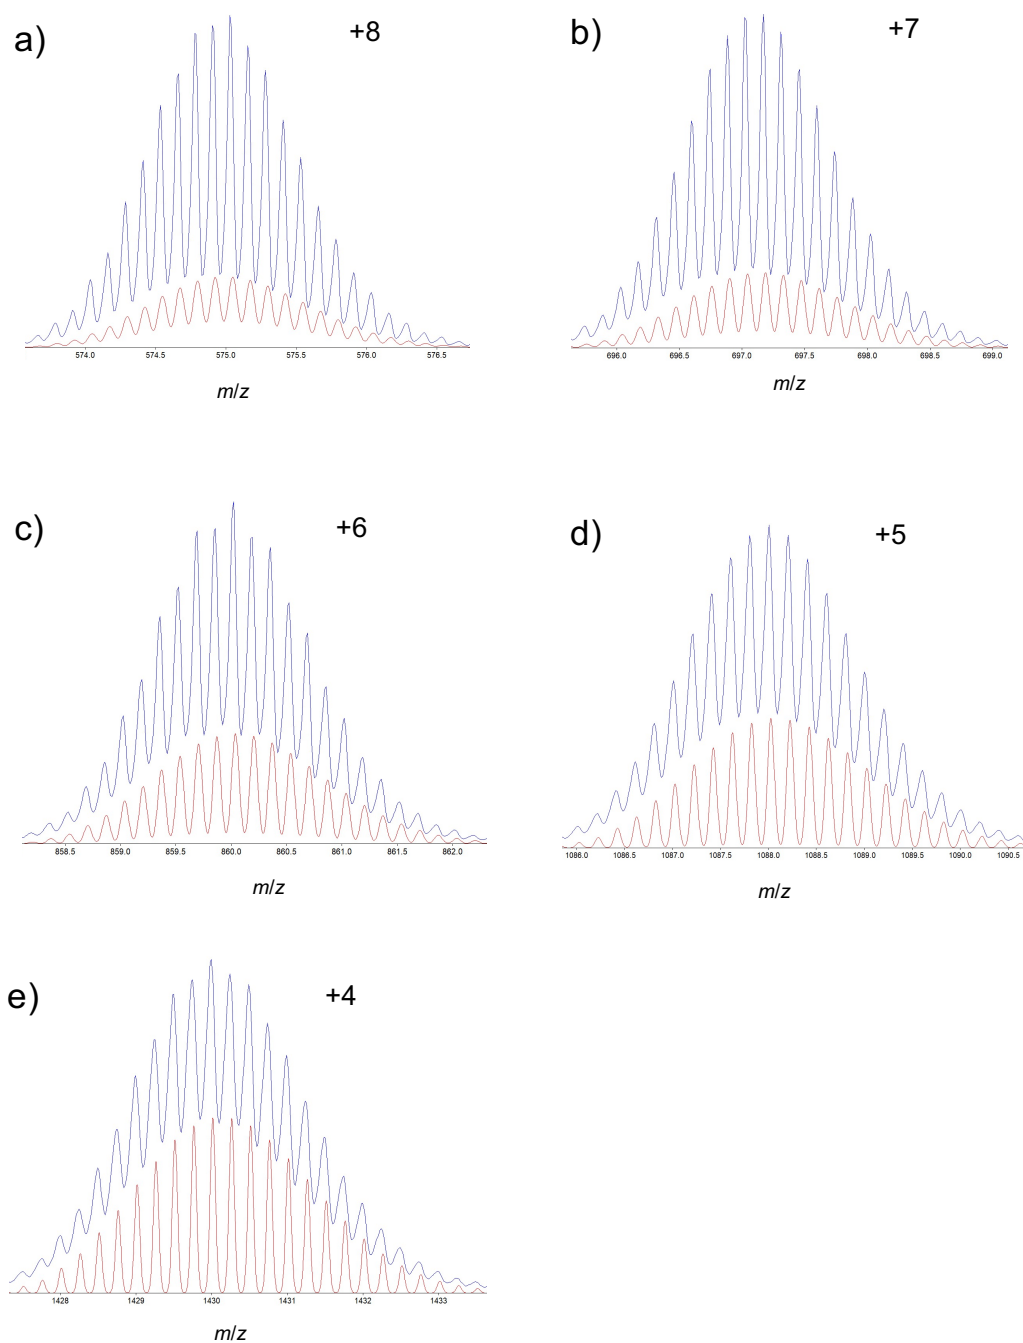

**Figure S16.** HR-ESI-MS spectra of cage **1** in CH<sub>3</sub>CN. Experimental (blue) and calculated (red) peaks for a) [1·(NTf<sub>2</sub>)<sub>4</sub>]<sup>8+</sup>; b) [1·(NTf<sub>2</sub>)<sub>5</sub>]<sup>7+</sup>; c) [1·(NTf<sub>2</sub>)<sub>6</sub>]<sup>6+</sup>; d) [1·(NTf<sub>2</sub>)<sub>7</sub>]<sup>5+</sup>; e) [1·(NTf<sub>2</sub>)<sub>8</sub>]<sup>4+</sup>.

### 3.2 Self-Assembly and Characterization of Cage 2

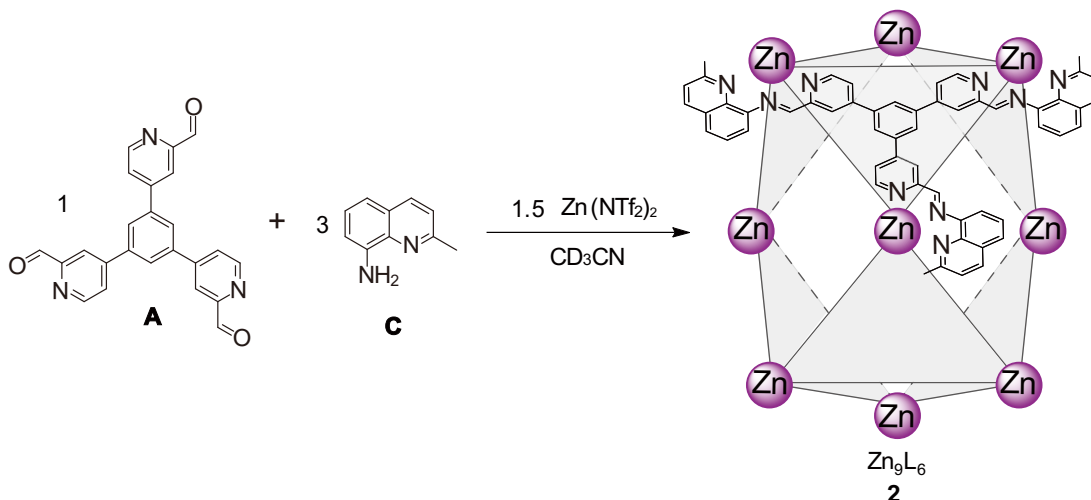

**A** (23.6 mg, 0.06 mmol, 6 equiv), 2-methyl-8-aminoquinoline **C** (28.48 mg, 0.12 mmol, 18 equiv) and  $Zn(NTf_2)_2$  (56.32 mg, 0.09 mmol, 9 equiv) were combined in  $CH_3CN$  (3.0 mL) in a 15 mL tube. The reaction mixture was sealed and stirred at 70 °C overnight. The solvent was reduced to 0.3 mL, and  $Et_2O$  (10 mL) was then added. The precipitate was collected by centrifugation and washed with excess diethyl ether, affording cage **2** as a dark solid (98.65 mg, 91%).

$^{13}C$  NMR (125 MHz,  $CD_3CN$ ):  $\delta$  163.7, 163.4, 157.0, 150.3, 148.2, 141.6, 141.2, 134.7, 133.1, 129.4, 128.4, 126.6, 121.0, 24.9. Due to the presence of multiple isomers and low symmetry of cage **2**, many  $^{13}C$  signals overlap, thus fewer than the expected number of signals are observed.

**HR-ESI-MS**:  $m/z = 771.2788$ ,  $[1 \cdot (NTf_2)_8]^{10+}$ , (calc. 771.3443); 888.0794,  $[1 \cdot (NTf_2)_9]^{9+}$ , (calc. 888.1769); 1034.2069,  $[1 \cdot (NTf_2)_{10}]^{8+}$ , (calc. 1034.2176); 1221.9398,  $[1 \cdot (NTf_2)_{11}]^{7+}$ , (calc. 1221.9842); 1472.2504,  $[1 \cdot (NTf_2)_{12}]^{6+}$ , (calc. 1472.3398); 1822.6828,  $[1 \cdot (NTf_2)_{13}]^{5+}$ , (calc. 1822.8375).

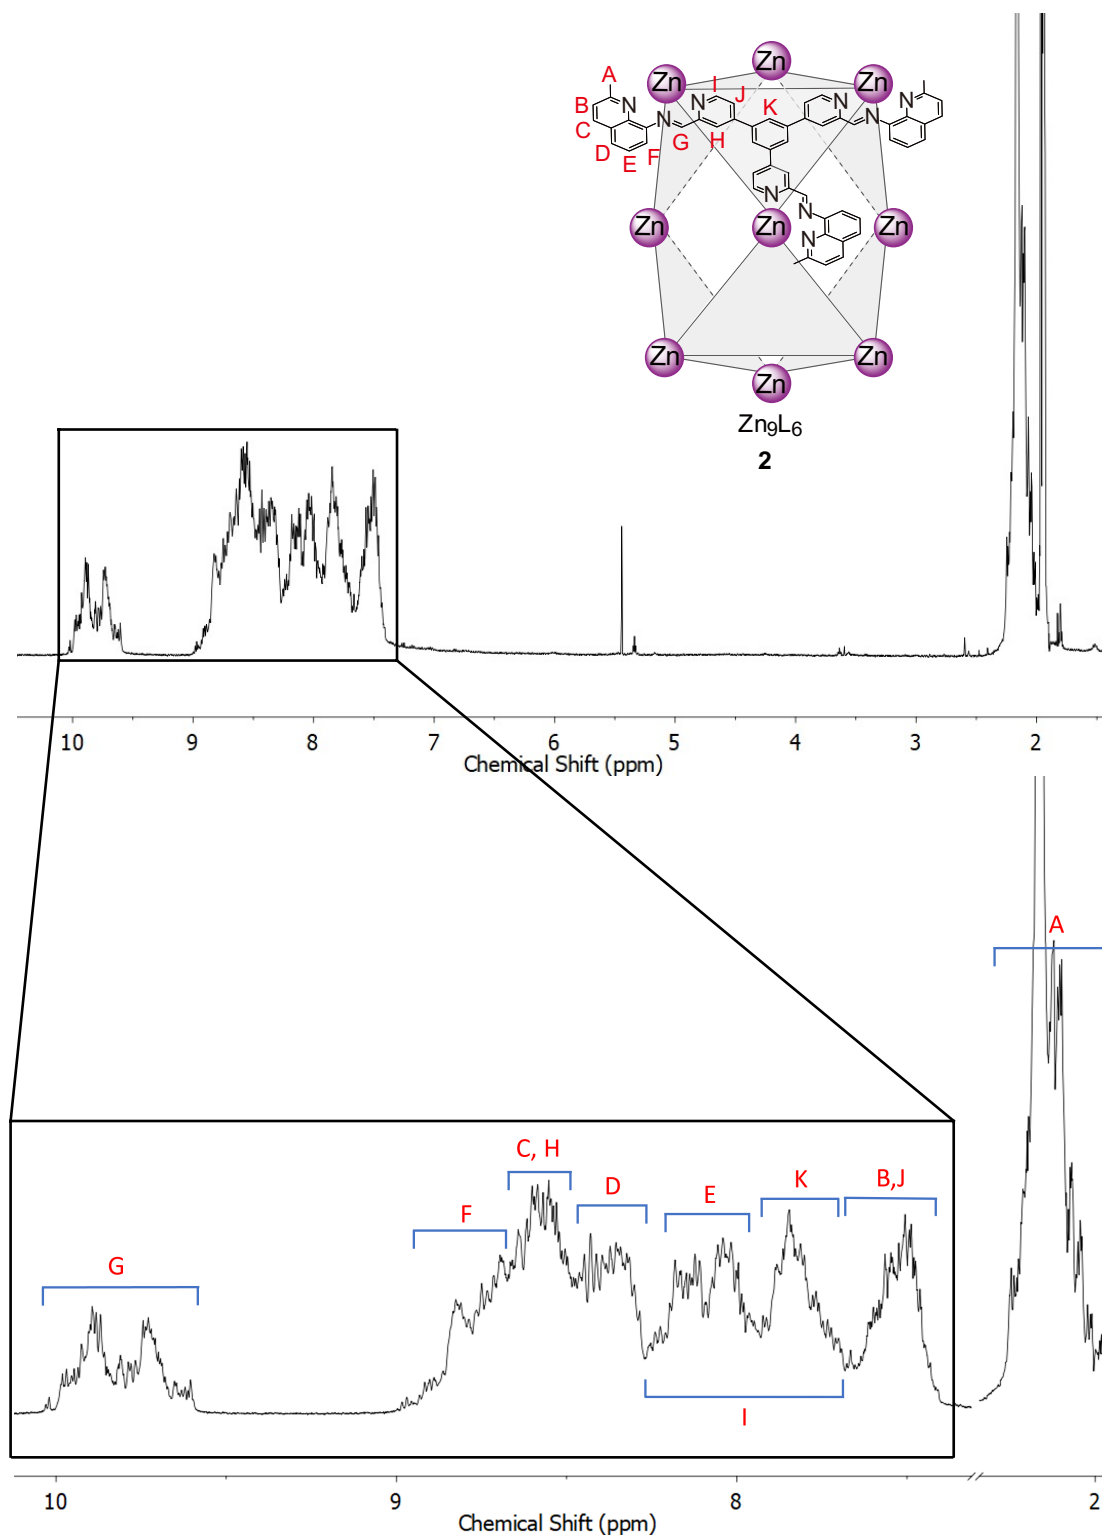

**Figure S17.**  $^1\text{H}$  NMR spectrum of cage **2** (500 MHz,  $\text{CD}_3\text{CN}$ , 298 K) with assignments of protons shown.

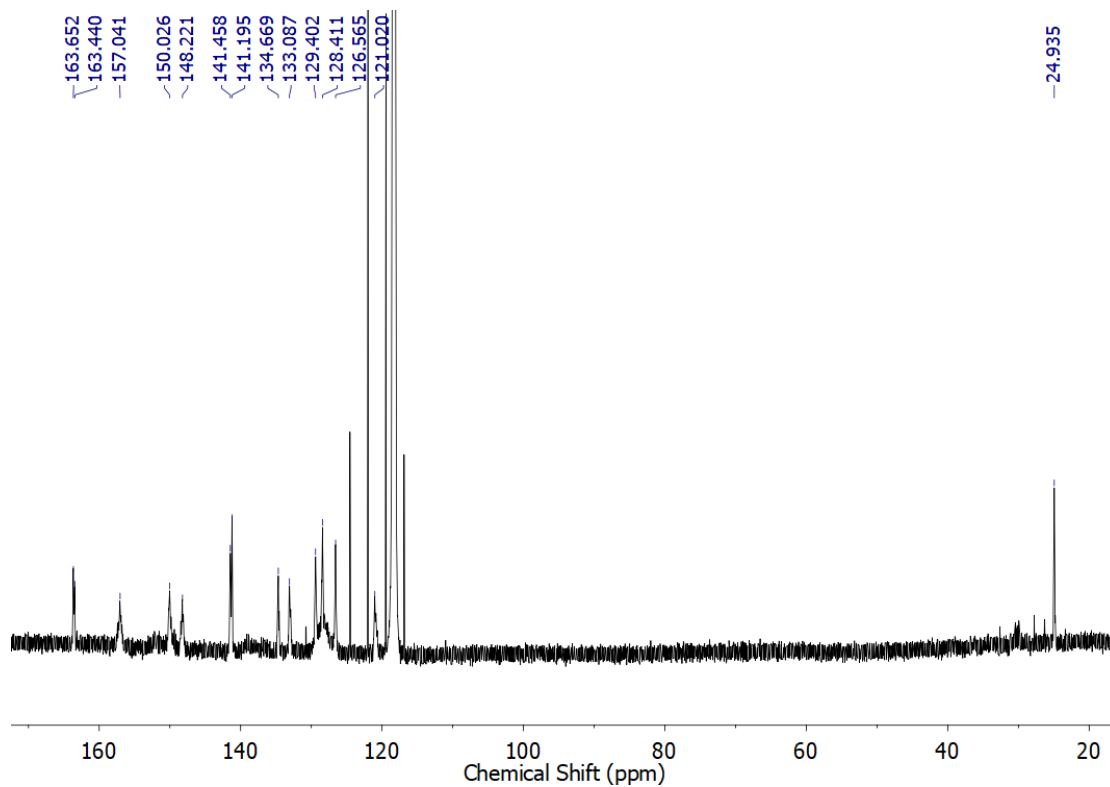

**Figure S18.**  $^{13}\text{C}$  NMR spectrum of cage 2 (125 MHz,  $\text{CD}_3\text{CN}$ , 298 K).

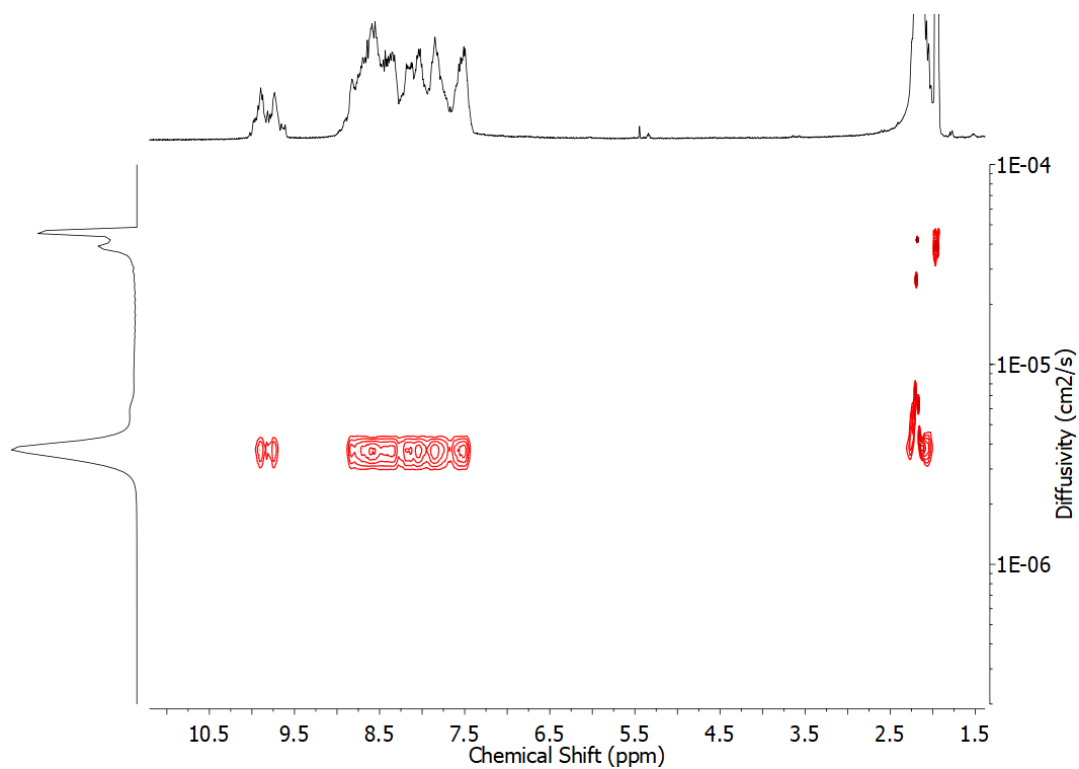

**Figure S19.**  $^1\text{H}$  DOSY spectrum of cage 2 (400 MHz,  $\text{CD}_3\text{CN}$ , 298 K). The diffusion coefficient for all diastereomers was measured to be  $3.75 \times 10^{-6} \text{ cm}^2/\text{s}$ .

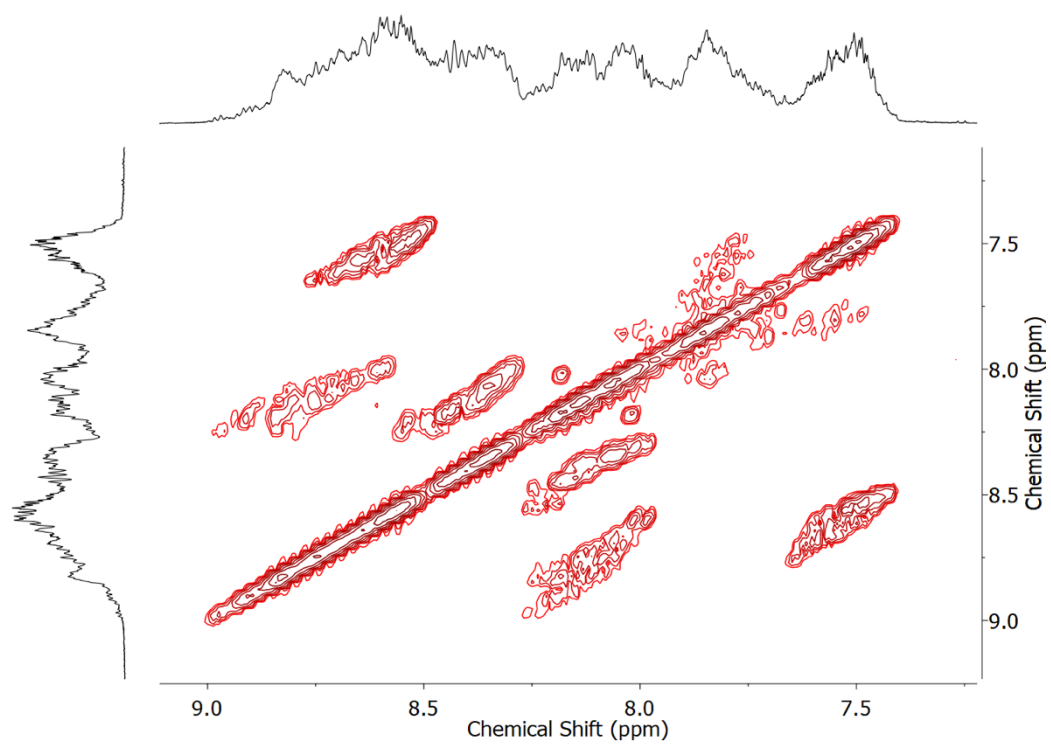

**Figure S20.**  $^1\text{H}$ - $^1\text{H}$  COSY NMR spectrum of cage **2** (500 MHz,  $\text{CD}_3\text{CN}$ , 298 K).

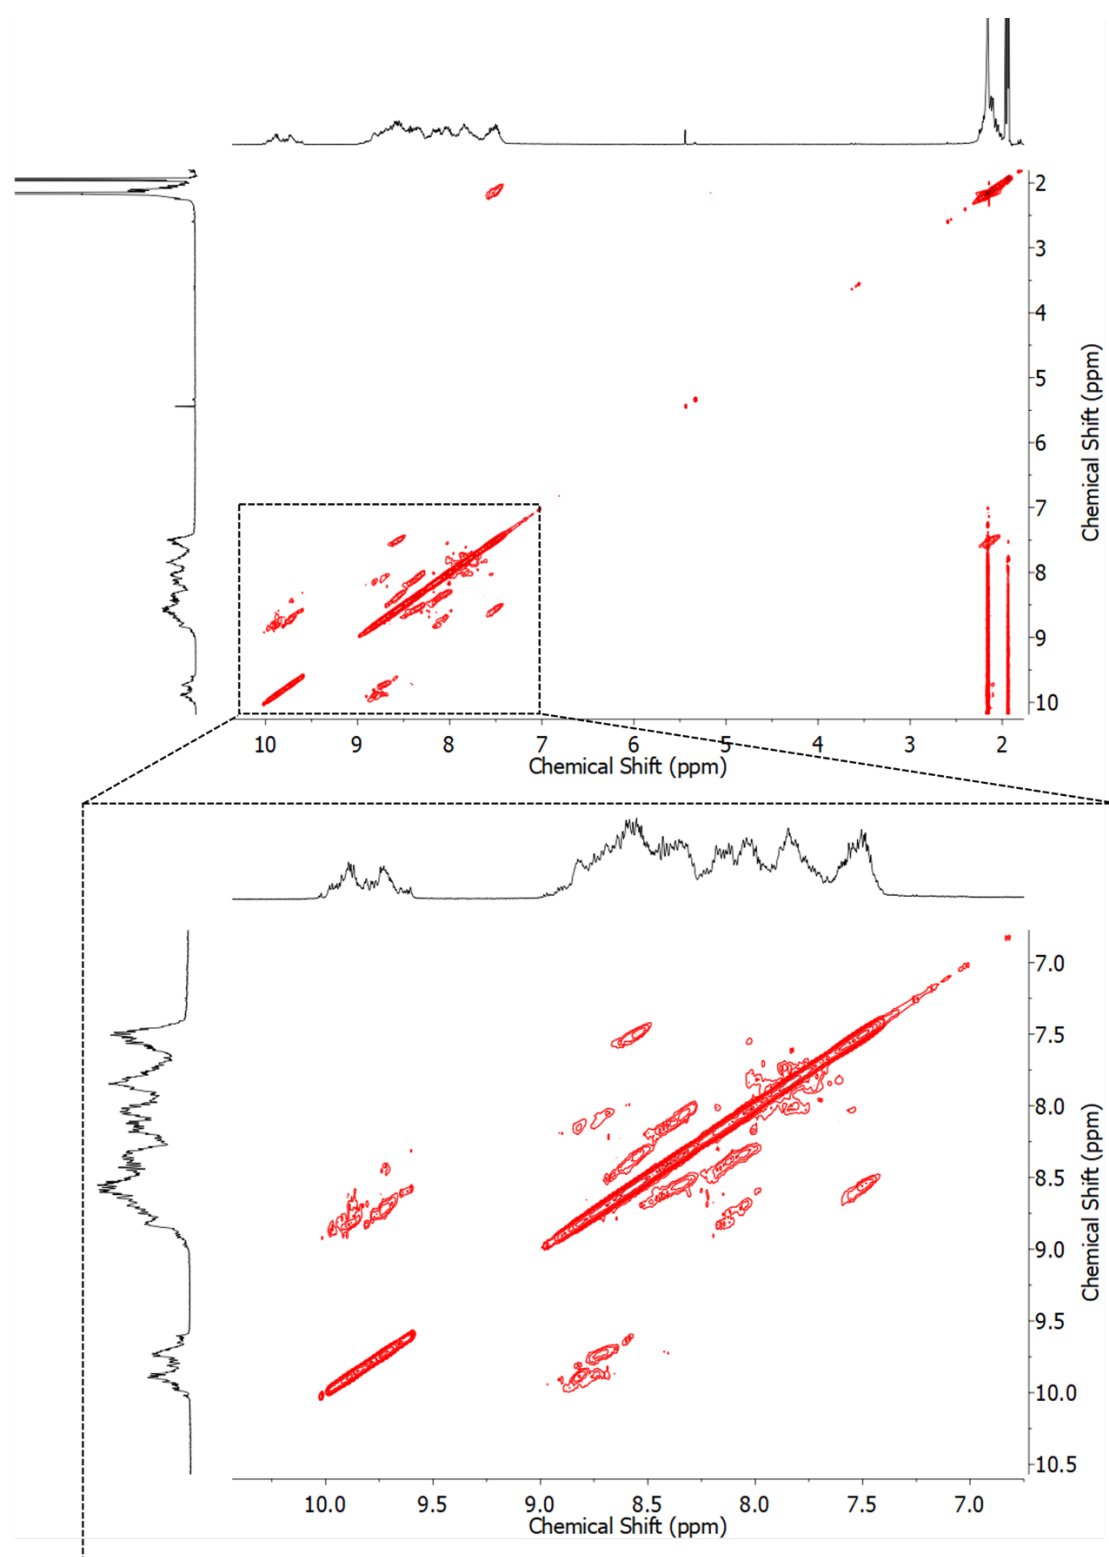

**Figure S21.**  $^1\text{H}$ - $^1\text{H}$  NOESY NMR spectrum of cage **2** (500 MHz,  $\text{CD}_3\text{CN}$ , 298 K).

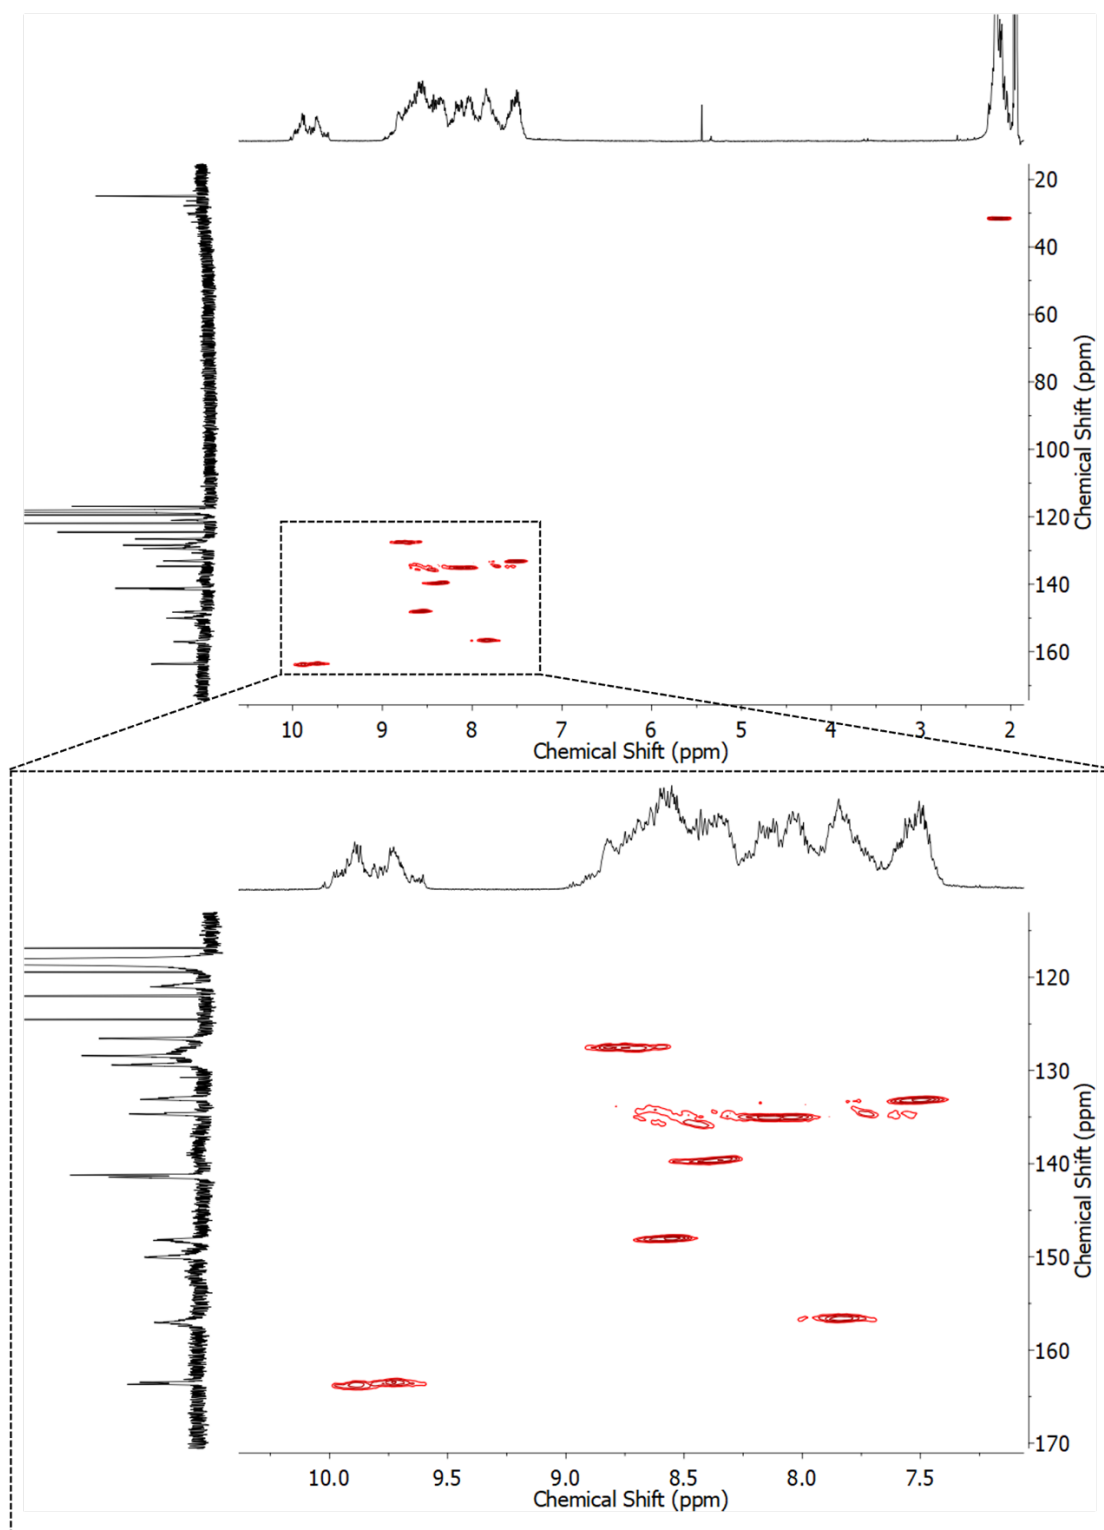

**Figure S22.**  $^1\text{H}$ - $^{13}\text{C}$  HSQC NMR spectrum of cage **2** (500 MHz,  $\text{CD}_3\text{CN}$ , 298 K).



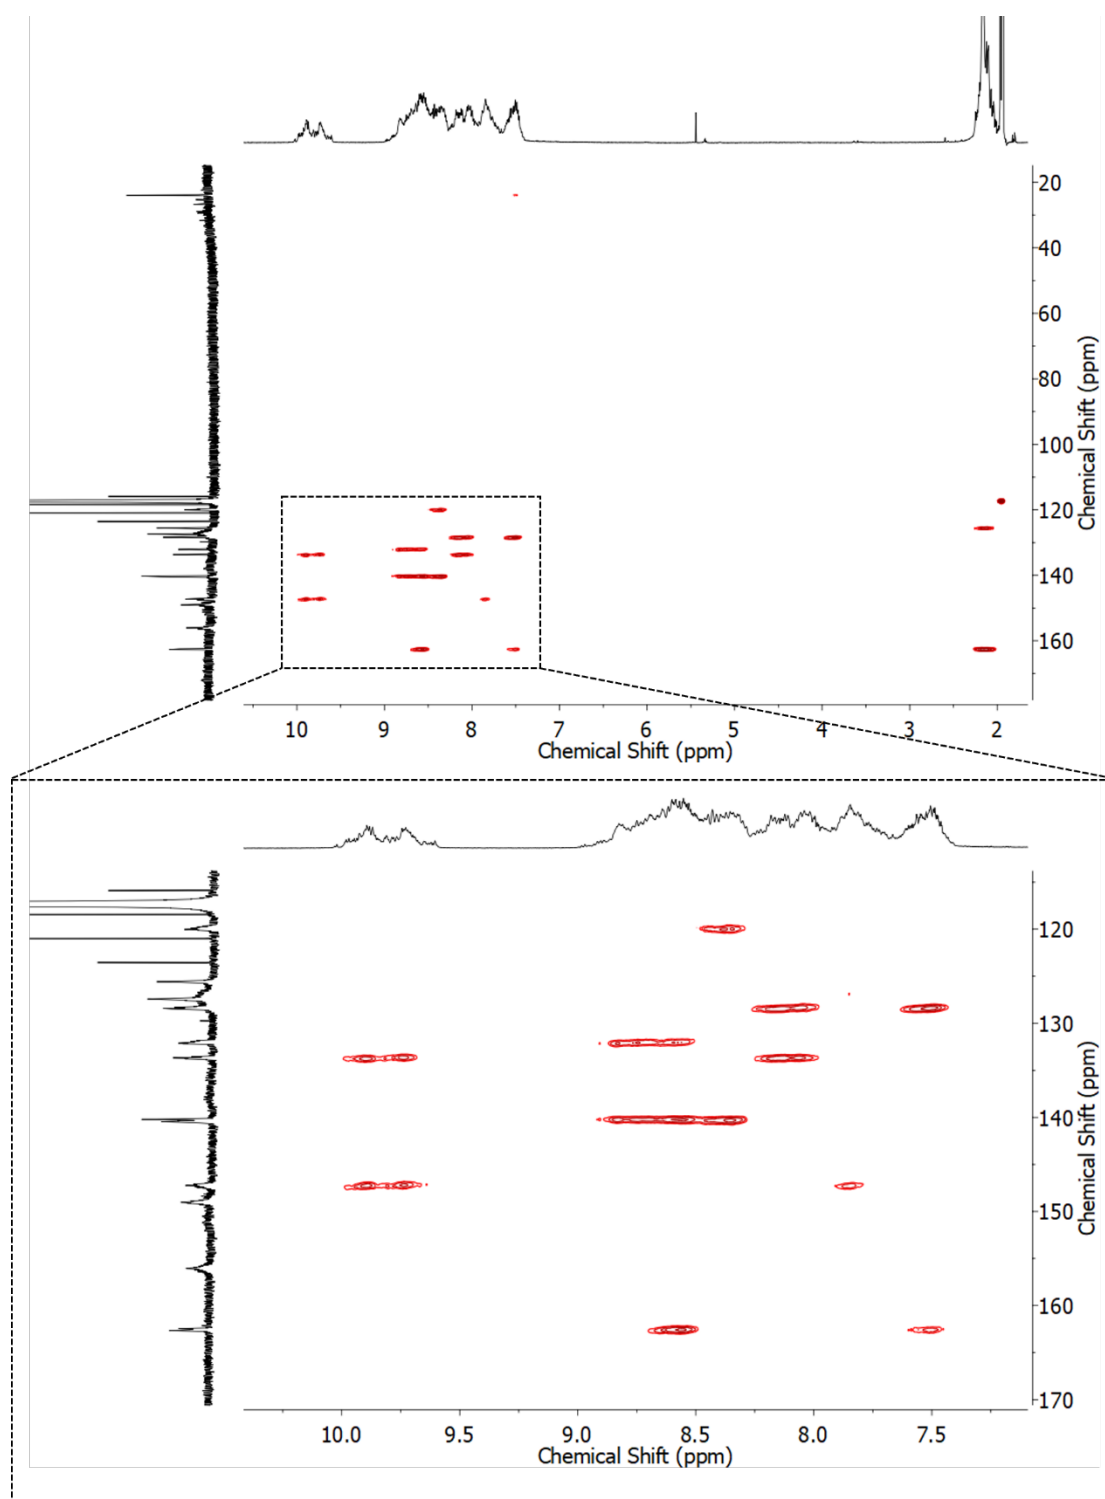

**Figure S23.**  $^1\text{H}$ - $^{13}\text{C}$  HMBC NMR spectrum of cage **2** (500 MHz,  $\text{CD}_3\text{CN}$ , 298 K).

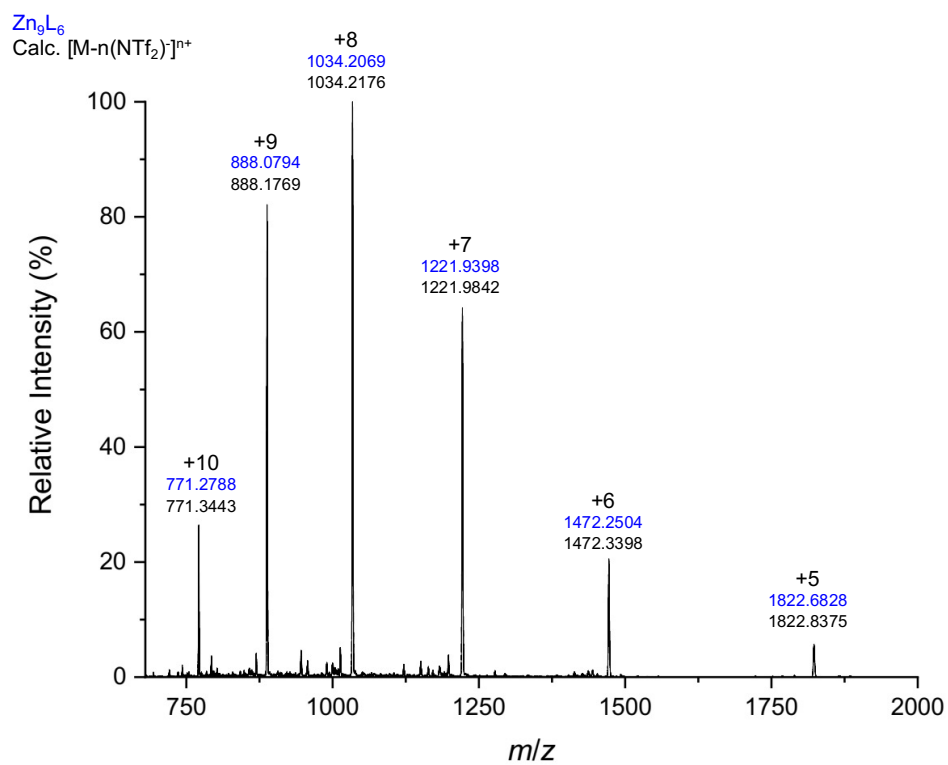

**Figure S24.** HR-ESI-MS spectrum of cage **2** in  $CH_3CN$ . Experimental (blue) and calculated (black) peaks.

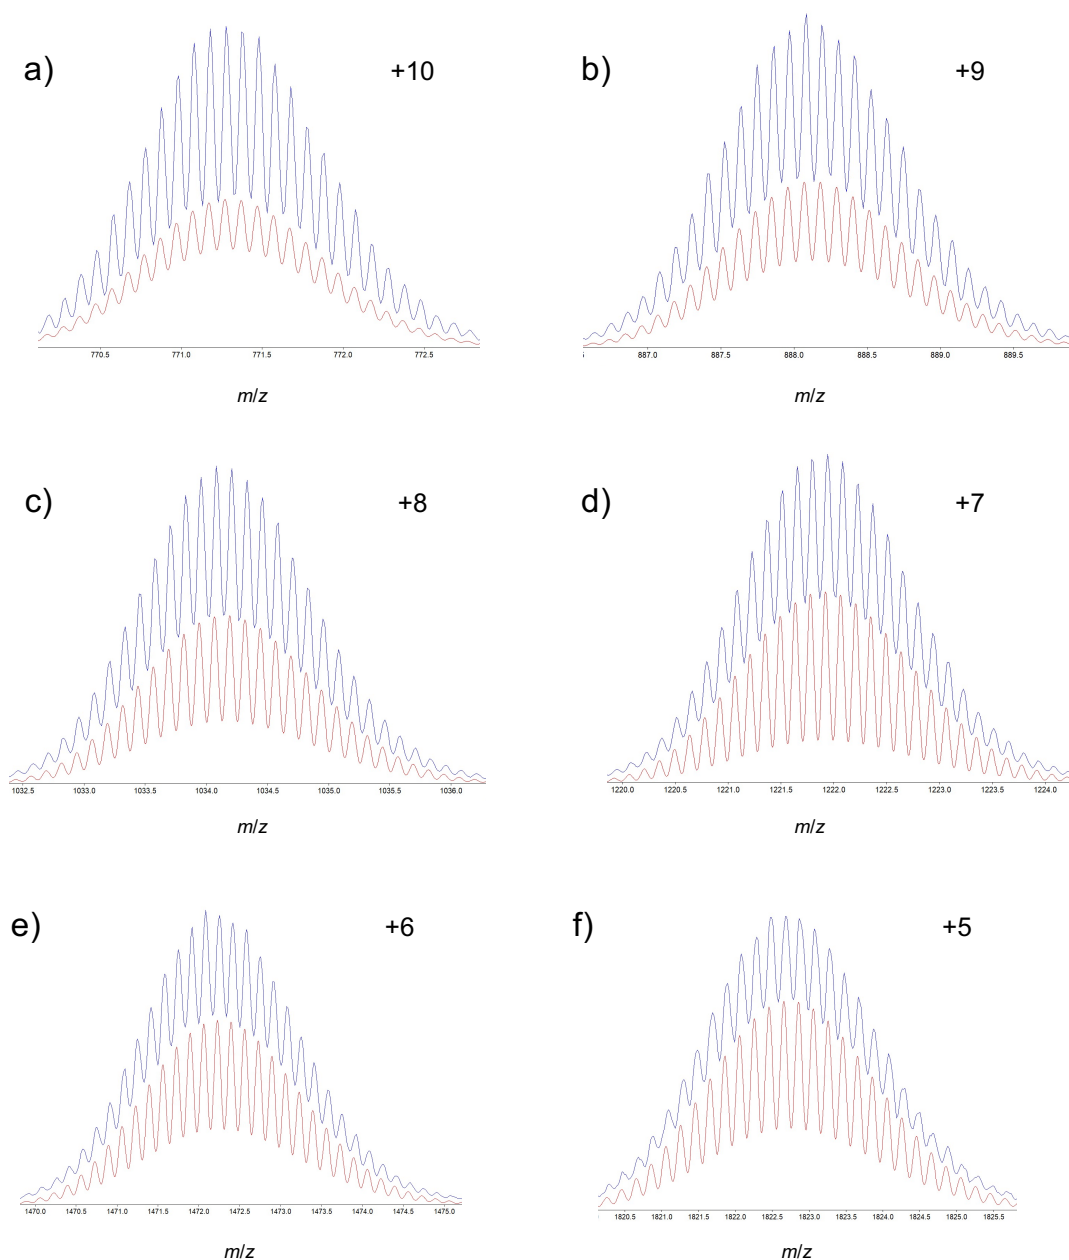

**Figure S25.** HR-ESI-MS spectra of cage **2** in CH<sub>3</sub>CN. Experimental (blue) and calculated (red) peaks for a)  $[2 \cdot (\text{NTf}_2)_8]^{10+}$ ; b)  $[2 \cdot (\text{NTf}_2)_9]^{9+}$ ; c)  $[2 \cdot (\text{NTf}_2)_{10}]^{8+}$ ; d)  $[2 \cdot (\text{NTf}_2)_{11}]^{7+}$ ; e)  $[2 \cdot (\text{NTf}_2)_{12}]^{6+}$ ; f)  $[2 \cdot (\text{NTf}_2)_{13}]^{5+}$ .



## 4.2 Trianionic Dodecatungstophosphate as a Template

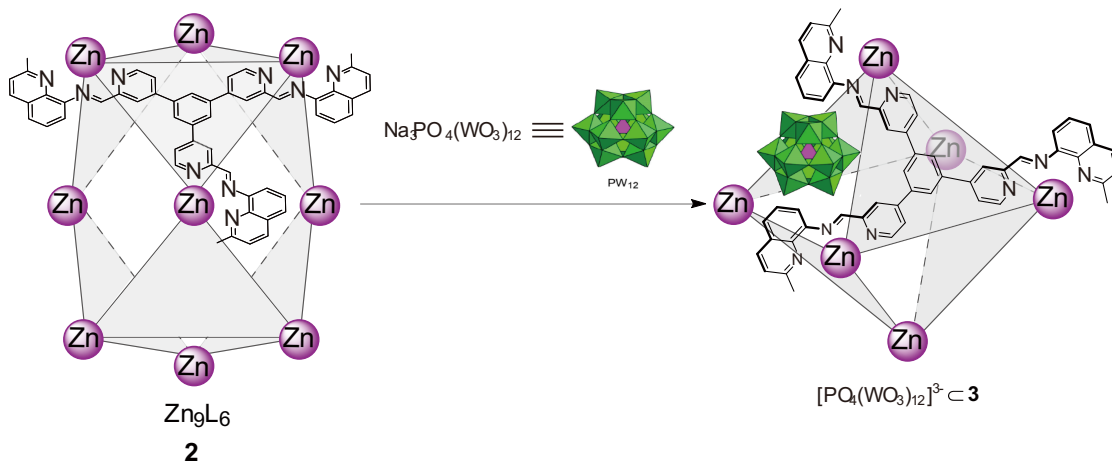

Cage **2** (1.60 mg, 1.0 equiv), sodium dodecatungstophosphate hydrate (1.13 mg, 1.2 equiv) were combined in  $\text{CD}_3\text{CN}$  (0.5 mL) in a 5 mL tube. The reaction mixture was sealed and stirred with 1200 rds at 70 °C for 5 days. The host–guest complex  $[\text{PO}_4(\text{WO}_3)_{12}]^{3-} \text{c } \mathbf{3}$  with low solubility was obtained.

**HR-ESI-MS:**  $m/z = 850.6223$ ,  $[\mathbf{3} \cdot (\text{PO}_4(\text{WO}_3)_{12})(\text{NTf}_2)]^{8+}$ , (calc. 850.6711); 1012.1293,  $[\mathbf{3} \cdot (\text{PO}_4(\text{WO}_3)_{12})(\text{NTf}_2)_2]^{7+}$ , (calc. 1012.2169); 1227.6374,  $[\mathbf{3} \cdot (\text{PO}_4(\text{WO}_3)_{12})(\text{NTf}_2)_3]^{6+}$ , (calc. 1227.6112); 1529.1494,  $[\mathbf{3} \cdot (\text{PO}_4(\text{WO}_3)_{12})(\text{NTf}_2)_4]^{5+}$ , (calc. 1529.1632); 1981.4172,  $[\mathbf{3} \cdot (\text{PO}_4(\text{WO}_3)_{12})(\text{NTf}_2)_5]^{4+}$ , (calc. 1981.4913).

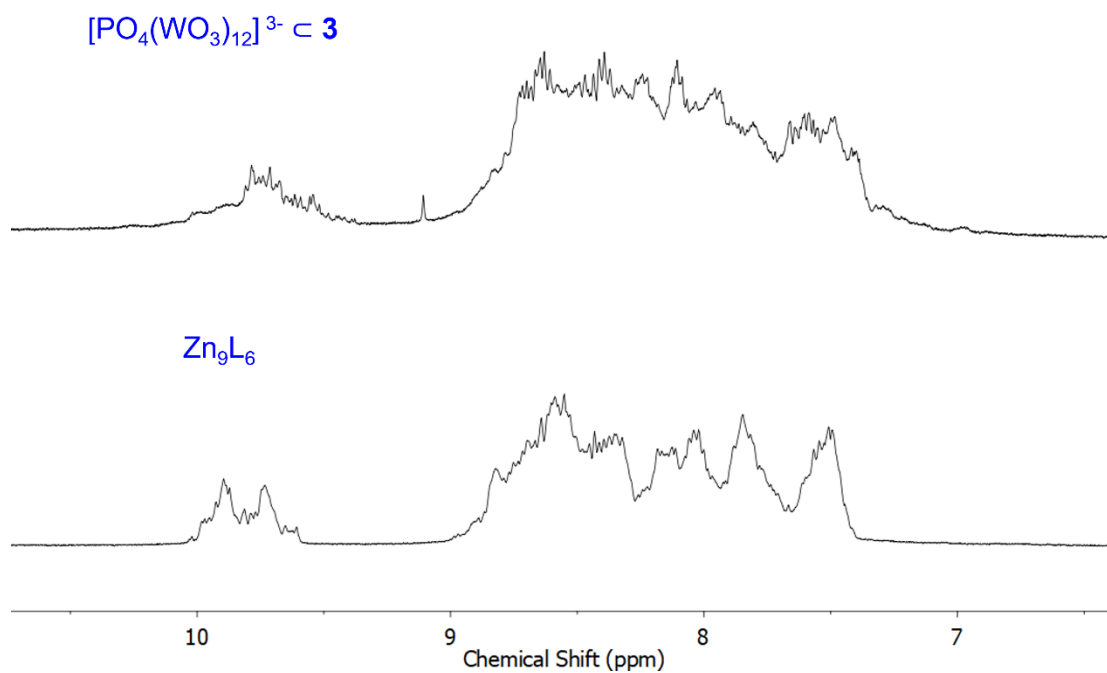

**Figure S27.**  $^1\text{H}$  NMR spectra (500 MHz,  $\text{CD}_3\text{CN}$ , 298 K) of  $[\text{PO}_4(\text{WO}_3)_{12}]^{3-} \text{c } \mathbf{3}$  (top spectrum), compared to the free cage  $\mathbf{2}$  (bottom spectrum).

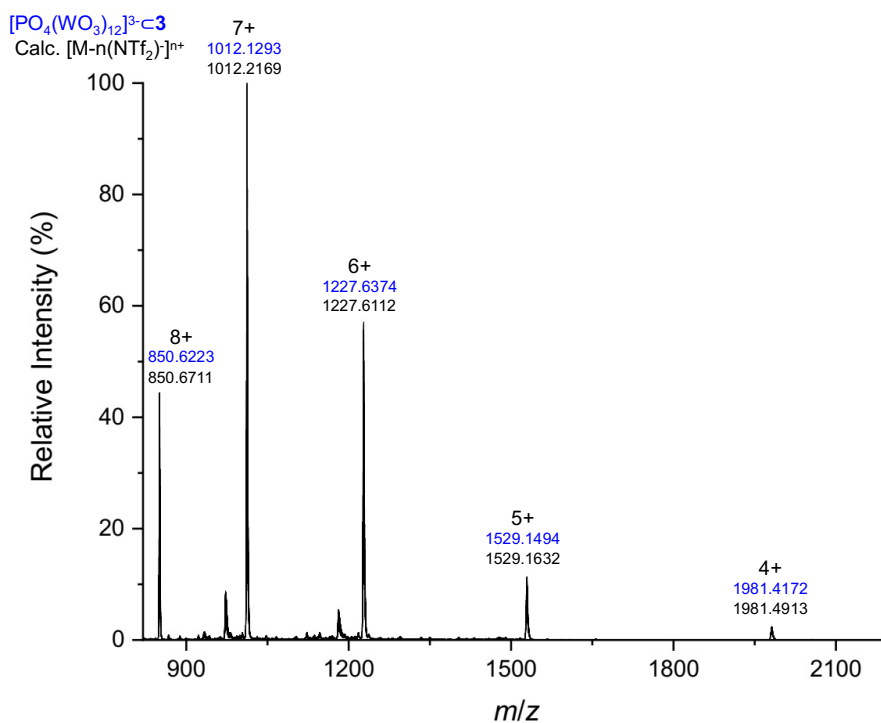

**Figure S28.** HR-ESI-MS spectrum of  $[\text{PO}_4(\text{WO}_3)_{12}]^{3-} \text{c } \mathbf{3}$  in  $\text{CH}_3\text{CN}$ . Experimental (blue) and calculated (black) peaks.

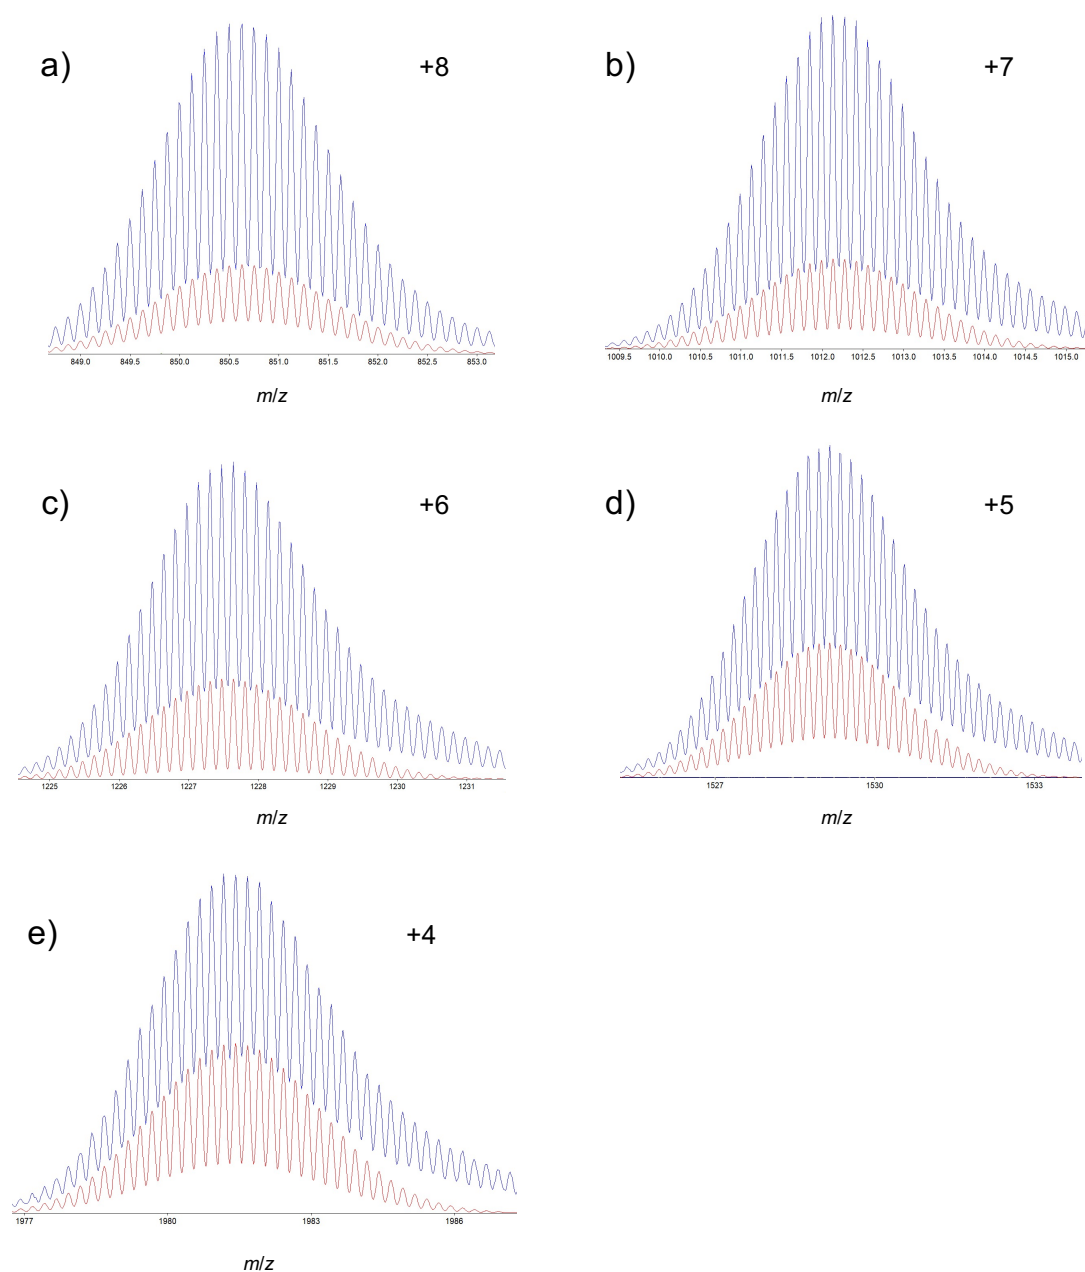

**Figure S29.** HR-ESI-MS spectra of  $[\text{PO}_4(\text{WO}_3)_{12}]^{3-} \text{c}3$  in  $\text{CH}_3\text{CN}$ . Experimental (blue) and calculated (red) peaks for a)  $[\mathbf{3} \cdot (\text{NTf}_2)(\text{PO}_4(\text{WO}_3)_{12})]^{8+}$ ; b)  $[\mathbf{3} \cdot (\text{NTf}_2)_2(\text{PO}_4(\text{WO}_3)_{12})]^{7+}$ ; c)  $[\mathbf{3} \cdot (\text{NTf}_2)_3(\text{PO}_4(\text{WO}_3)_{12})]^{6+}$ ; d)  $[\mathbf{3} \cdot (\text{NTf}_2)_4(\text{PO}_4(\text{WO}_3)_{12})]^{5+}$ ; e)  $[\mathbf{3} \cdot (\text{NTf}_2)_5(\text{PO}_4(\text{WO}_3)_{12})]^{4+}$ .

### 4.3 Dianionic 4,4'-Dinitrostilbene-2,2'-disulfonate as a Template

#### 4.3.1 Characterization of (G)<sub>4</sub>C<sub>3</sub>-S<sub>4</sub>

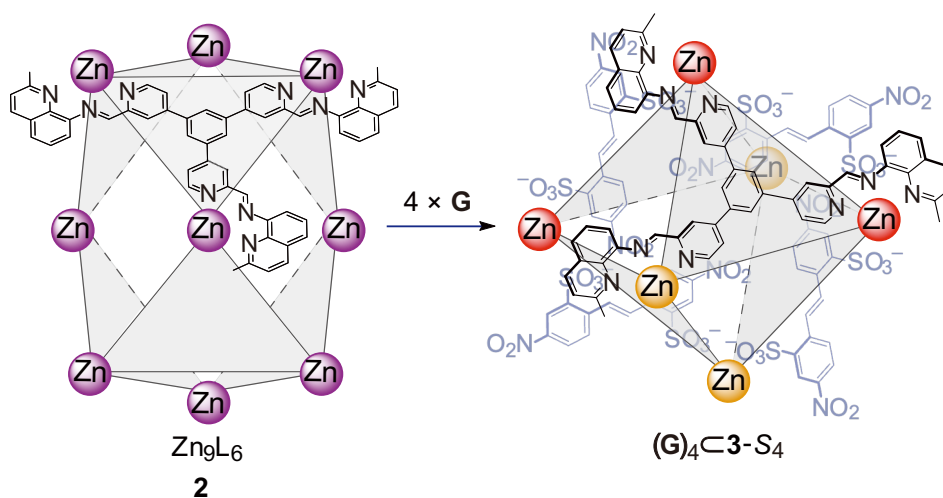

Cage **2** (3.0 mg), disodium 4,4'-dinitrostilbene-2,2'-disulfonate (**G**, 3.0 mg, 0.12 mmol, 18 equiv) were combined in CD<sub>3</sub>CN (0.5 mL) in a 5 mL tube. The reaction mixture was sealed and stirred with 1200 rds at 70 °C for 6 h. The complex (G)<sub>4</sub>C<sub>3</sub>-S<sub>4</sub> with bad solubility was obtained.

<sup>1</sup>H NMR (500 MHz, CD<sub>3</sub>CN): δ 10.94 (s, 1H), 10.54 (s, 1H), 10.28 (s, 1H), 9.23 – 9.19 (m, 2H), 9.09 (s, 1H), 9.01 (d, *J* = 9.5 Hz, 1H), 8.93 (s, 1H), 8.83 (s, 1H), 8.54 – 8.52 (m, 2H), 8.49 – 8.48 (m, 2H), 8.43 (d, *J* = 10.5 Hz, 1H), 8.38 – 8.34 (m, 3H), 8.21 – 8.17 (m, 2H), 8.13 – 8.12 (m, 2H), 7.97 (d, *J* = 10.5 Hz, 1H), 7.88 – 7.83 (m, 2H), 7.75 (d, *J* = 6.0 Hz, 1H), 7.62 – 7.58 (m, 3H), 7.53 – 7.33 (m, 8H), 7.14 (d, *J* = 7.0 Hz, 1H), 5.93 (d, *J* = 6.0 Hz, 1H), 2.15 (s, 1H), 2.14 (s, 1H), 2.01 (s, 1H).

<sup>13</sup>C NMR (125 MHz, CD<sub>3</sub>CN): δ 163.5, 163.3, 163.1, 161.4, 159.1, 158.6, 151.4, 150.8, 150.5, 149.1, 149.0, 148.6, 148.6, 148.2, 147.1, 141.8, 141.4, 141.32, 141.26, 141.2, 141.0, 140.9, 139.8, 138.9, 136.2, 135.3, 135.1, 134.8, 132.3, 131.9, 131.4, 131.1, 129.8, 129.6, 129.0, 129.0, 128.9, 128.8, 128.1, 128.1, 127.9, 127.4, 127.3, 126.8, 126.7, 126.3, 126.2, 126.1, 124.7, 123.0, 122.3, 122.0, 121.6, 24.9, 24.8, 24.7.

HR-ESI-MS: *m/z* = 1340.4283, [**3** · (G)<sub>4</sub>]<sup>4+</sup>, (calc. 1340.3965); 1880.5372, [**3** · (G)<sub>4</sub>(NTf<sub>2</sub>)]<sup>3+</sup>, (calc. 1880.5783). **G** = 4,4'-dinitrostilbene-2,2'-disulfonate.



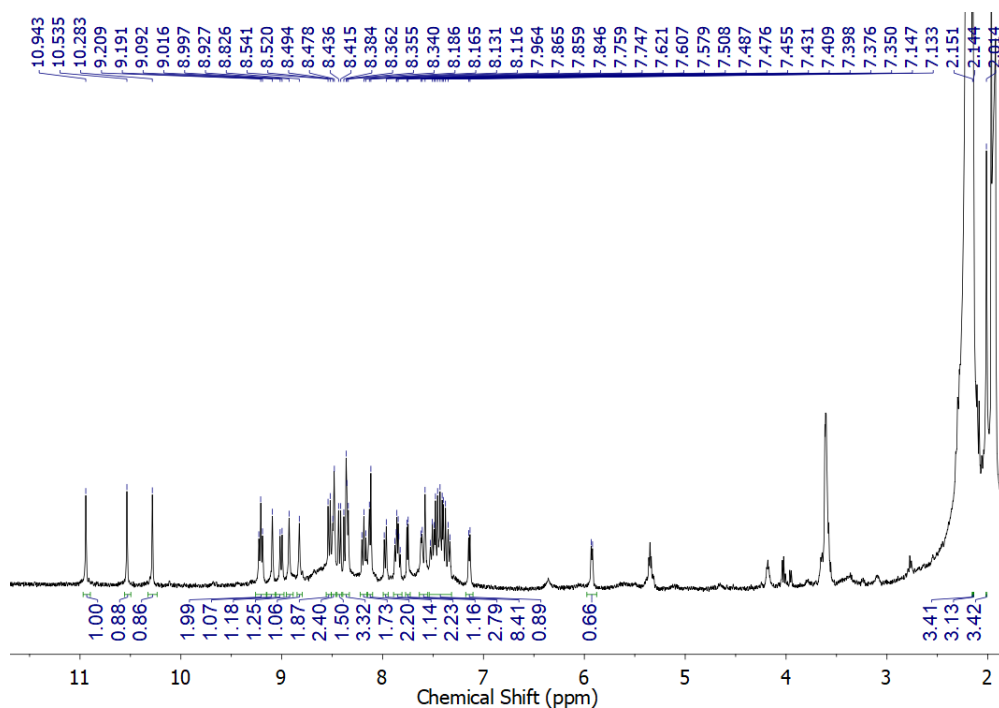

**Figure S30.** <sup>1</sup>H NMR spectrum of (G)<sub>4</sub>C<sub>3</sub>-S<sub>4</sub> (500 MHz, CD<sub>3</sub>CN, 298 K) with the integrals of peaks shown.

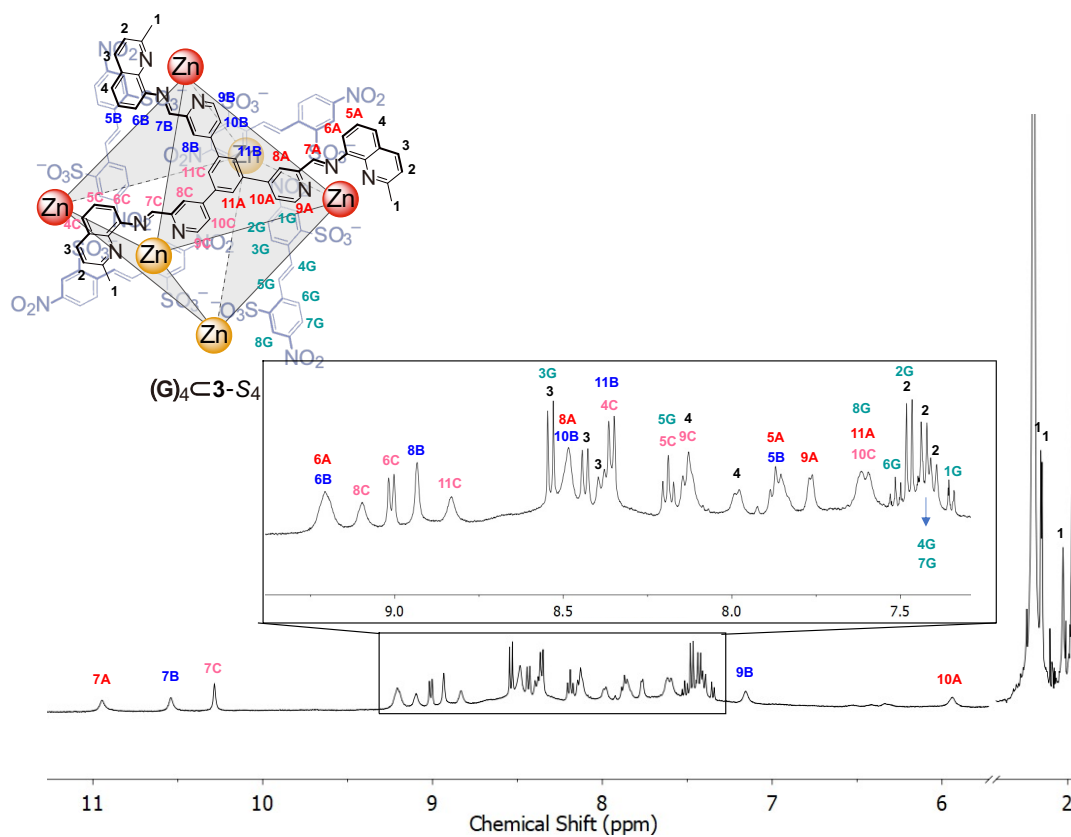

**Figure S31.** <sup>1</sup>H NMR spectrum of (G)<sub>4</sub>C<sub>3</sub>-S<sub>4</sub> (500 MHz, CD<sub>3</sub>CN, 298 K) with assignments of protons shown.

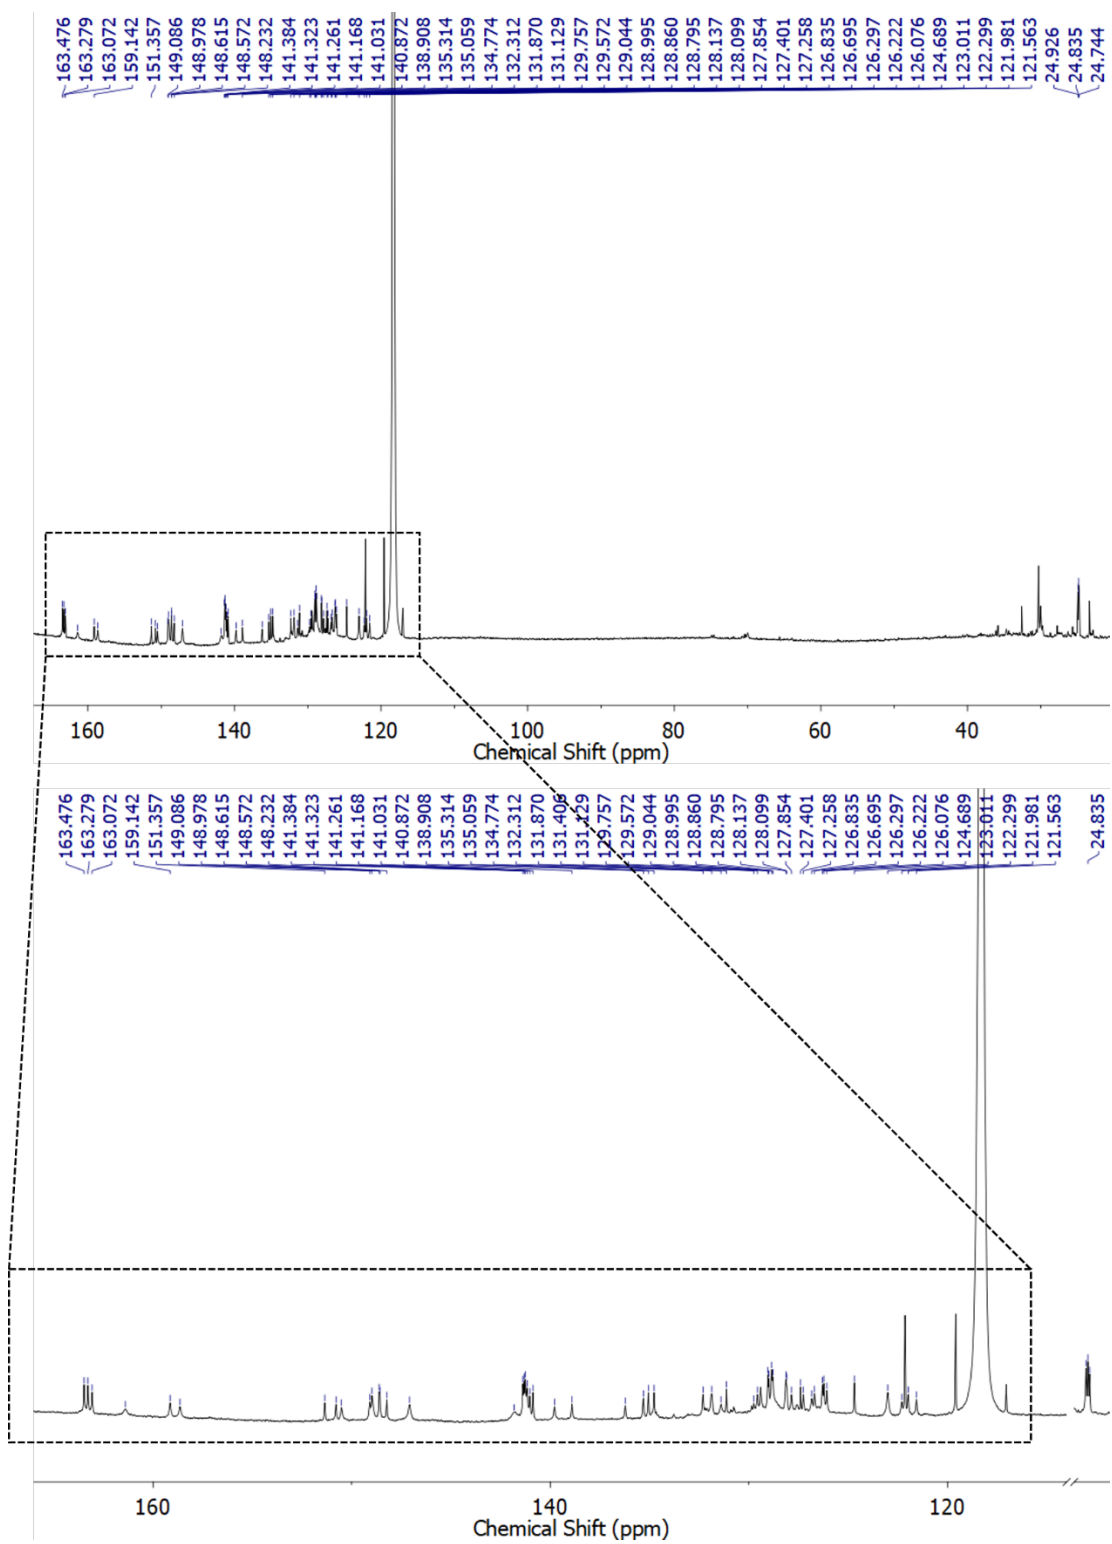

Figure S32.  $^{13}\text{C}$  NMR spectrum of  $(\text{G})_4\text{-3-S}_4$  (125 MHz,  $\text{CD}_3\text{CN}$ , 298 K).

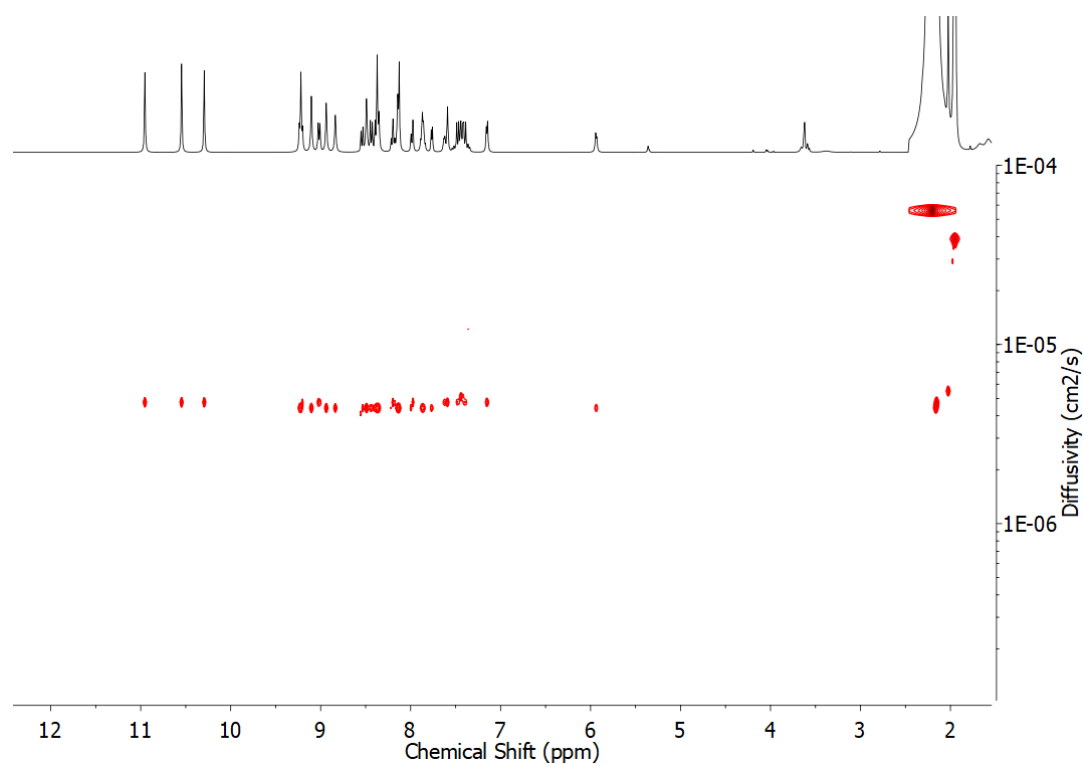

**Figure S33.**  $^1\text{H}$  DOSY spectrum of  $(\mathbf{G})_4\mathbf{c3-S}_4$  (400 MHz,  $\text{CD}_3\text{CN}$ , 298 K). The diffusion coefficient for both diastereomers in  $\text{CD}_3\text{CN}$  was measured to be  $4.53 \times 10^{-6} \text{ cm}^2/\text{s}$ .

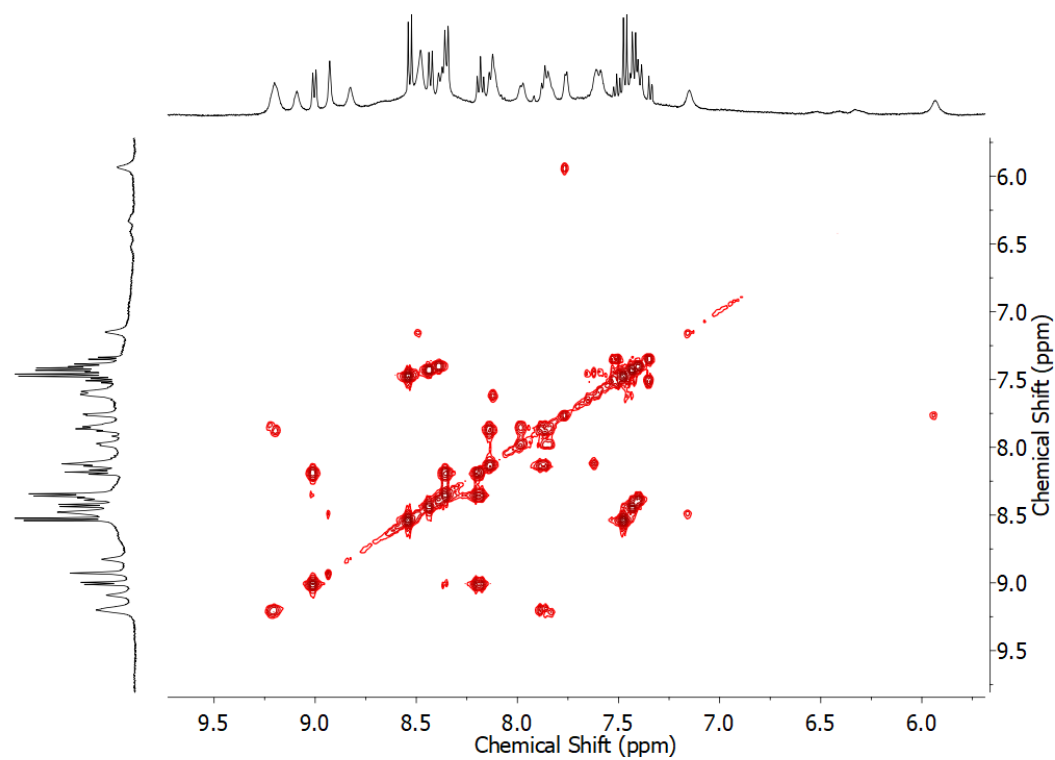

**Figure S34.**  $^1\text{H}$ - $^1\text{H}$  COSY NMR spectrum of  $(\mathbf{G})_4\mathbf{c3-S}_4$  (500 MHz,  $\text{CD}_3\text{CN}$ , 298 K).

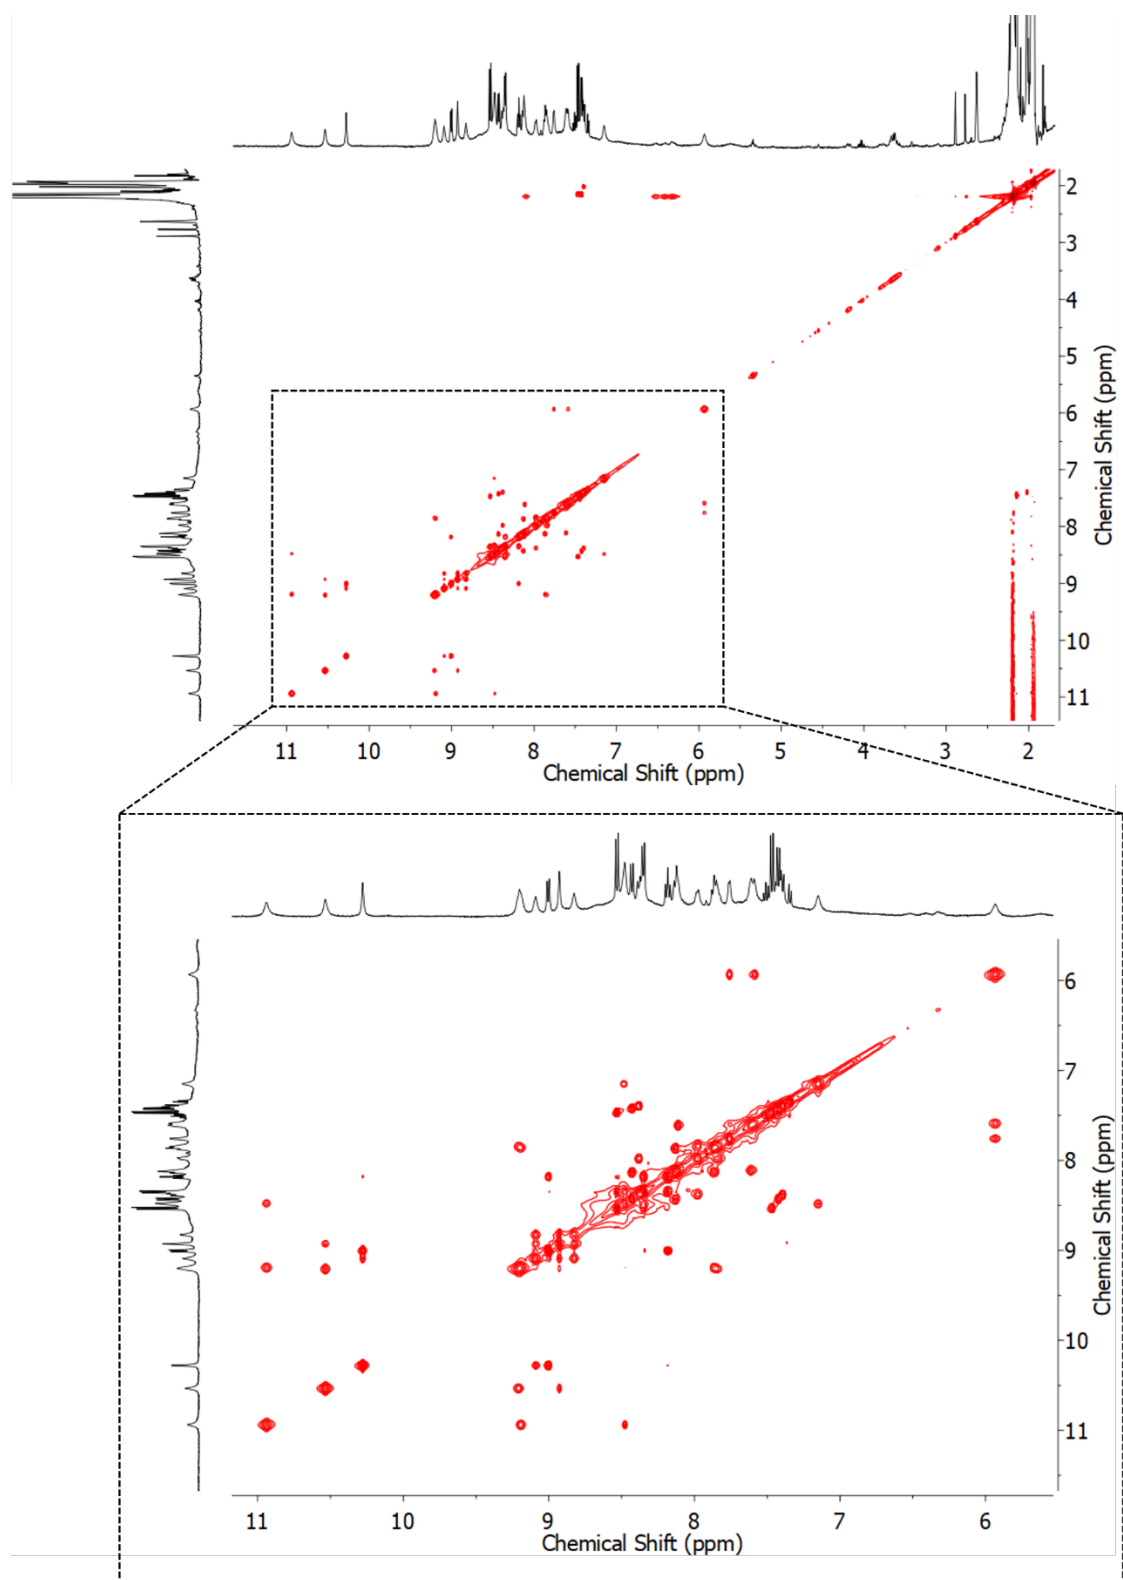

**Figure S35.**  $^1\text{H}$ - $^1\text{H}$  NOESY NMR spectrum of  $(\text{G})_4\text{c}3\text{-S}_4$  (500 MHz,  $\text{CD}_3\text{CN}$ , 298 K).

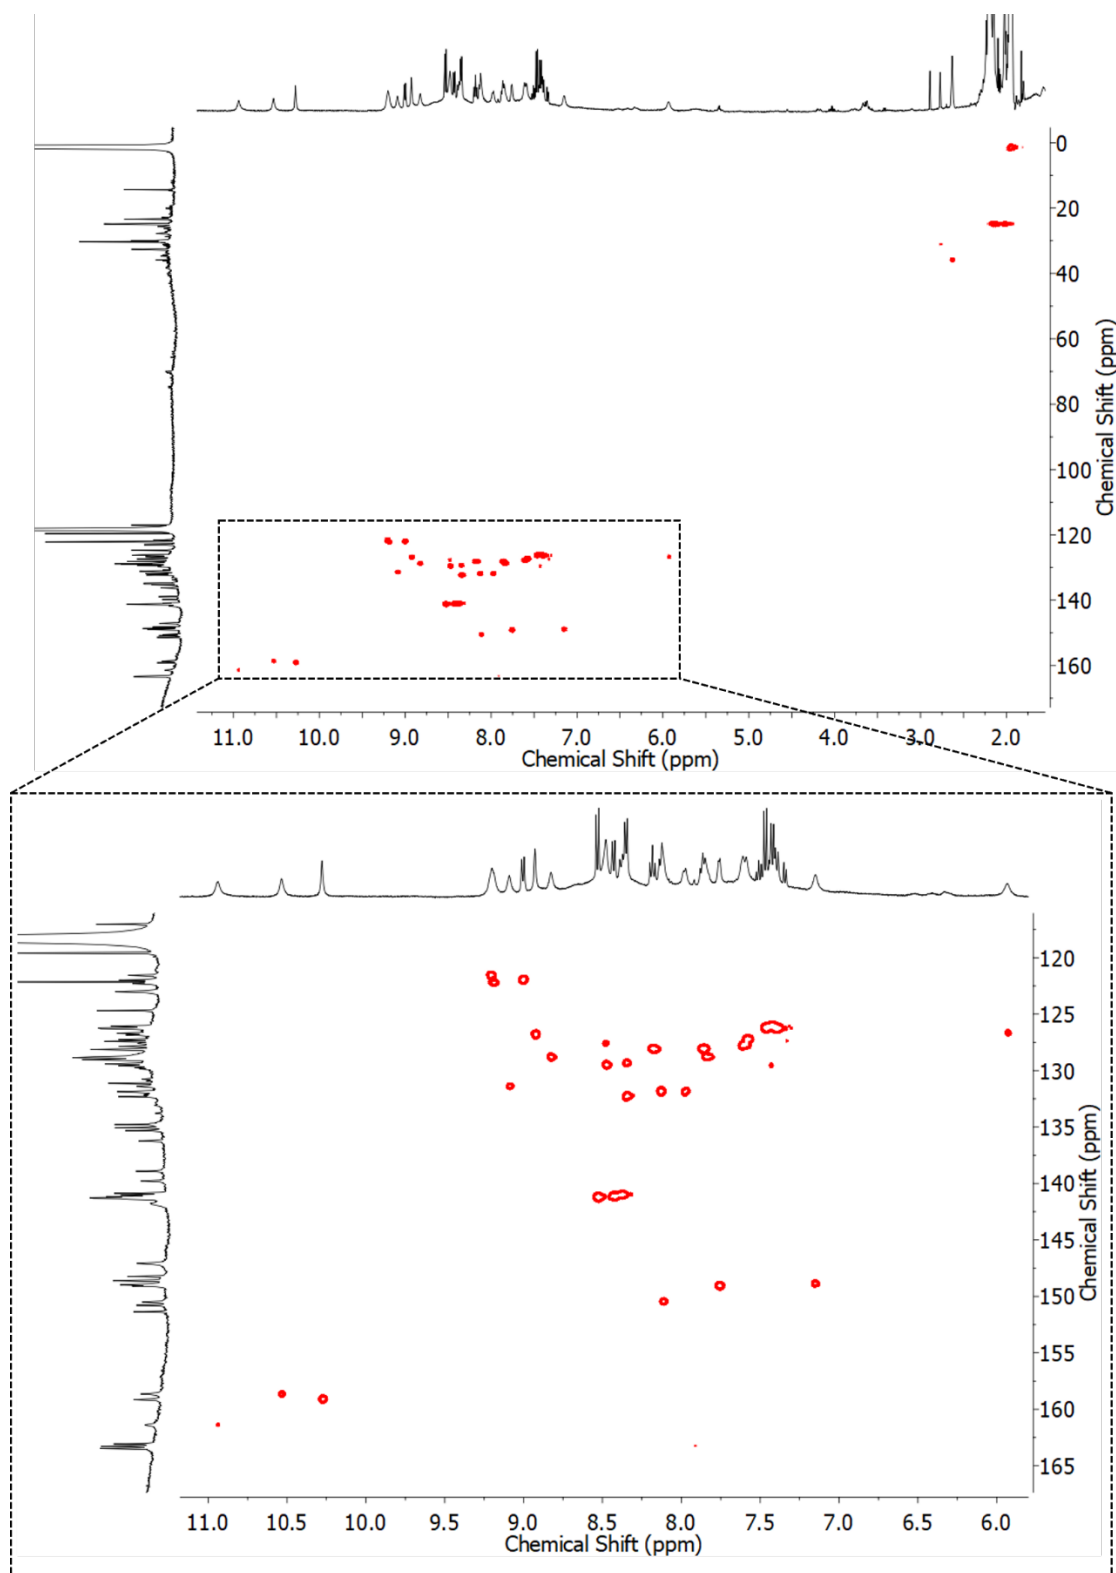

**Figure S36.**  $^1\text{H}$ - $^{13}\text{C}$  HSQC NMR spectrum of  $(\text{G})_4\text{c}3\text{-S}_4$  (500 MHz,  $\text{CD}_3\text{CN}$ , 298 K).

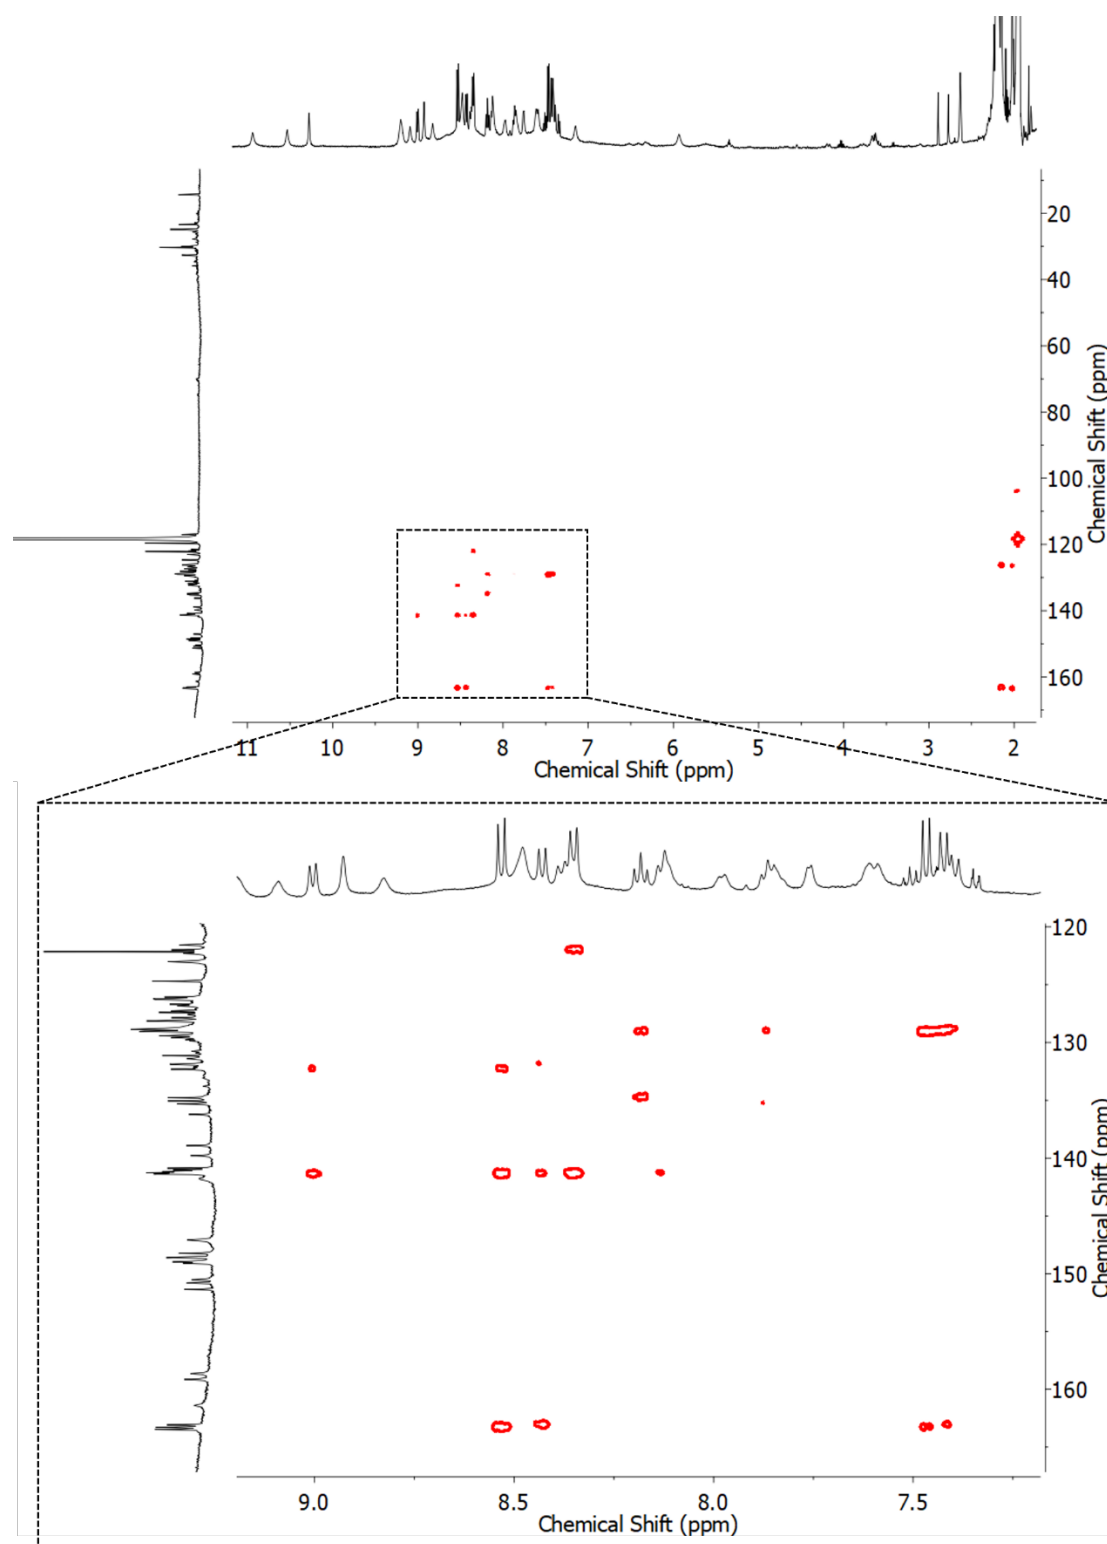

**Figure S37.**  $^1\text{H}$ - $^{13}\text{C}$  HMBC NMR spectrum of  $(\text{G})_4\text{-3-S}_4$  (500 MHz,  $\text{CD}_3\text{CN}$ , 298 K).

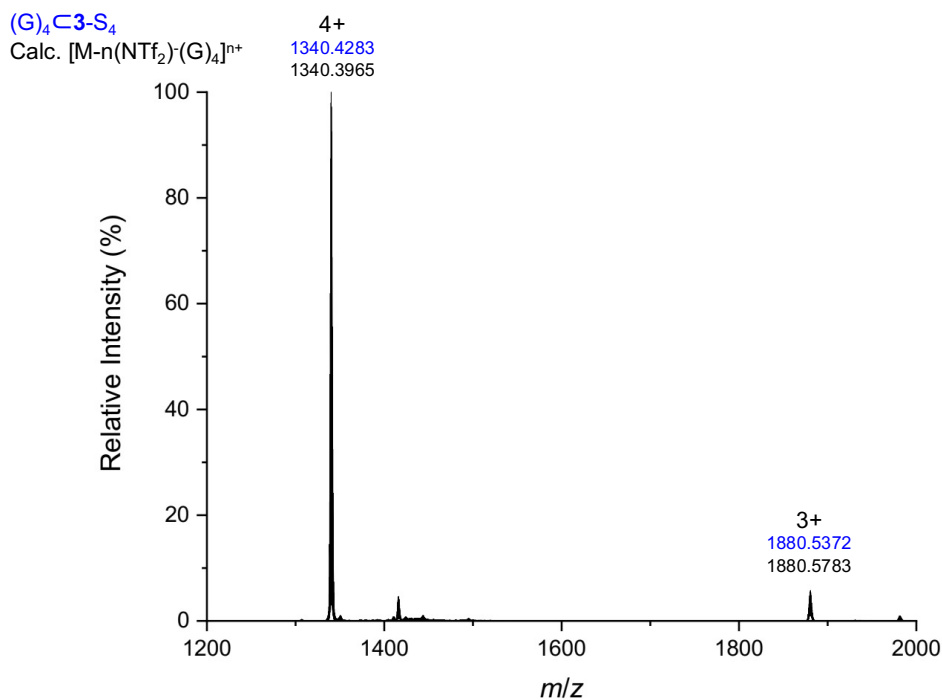

**Figure S38.** HR-ESI-MS spectrum of (G)<sub>4</sub>⊂3-S<sub>4</sub> in CH<sub>3</sub>CN. Experimental (blue) and calculated (black) peaks. G = 4,4'-dinitrostilbene-2,2'-disulfonate.

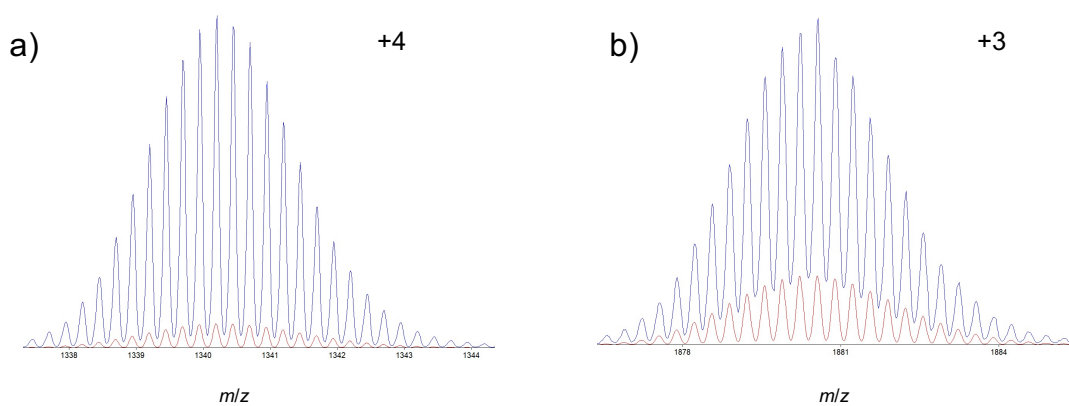

**Figure S39.** HR-ESI-MS spectra of (G)<sub>4</sub>⊂3-S<sub>4</sub> in CH<sub>3</sub>CN. Experimental (blue) and calculated (red) peaks for a) [2·(G)<sub>4</sub>]<sup>4+</sup>; b) [2·(NTf<sub>2</sub>)(G)<sub>4</sub>]<sup>3+</sup>. G = 4,4'-dinitrostilbene-2,2'-disulfonate.

### 4.3.2 Investigation of whether dilution of **2** is a factor in conversion of **2** to **(G)<sub>4</sub>C<sub>3</sub>**.

We monitored the reaction at ligand concentration of 5 or 2.5 mM at r.t. or 70 °C (Figures S40-S42). The dilution of the ligand accelerated the conversion of **2** into **(G)<sub>4</sub>C<sub>3</sub>** because of the poor solubility of **G** and **(G)<sub>4</sub>C<sub>3</sub>**.

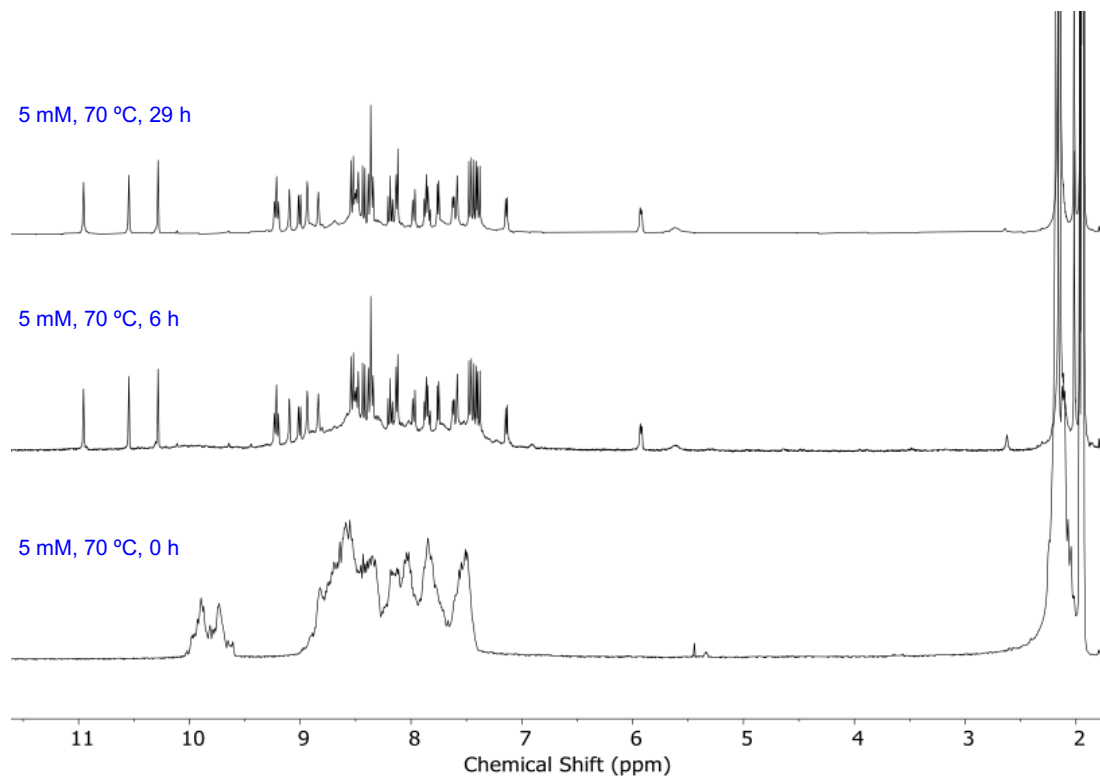

**Figure S40.** <sup>1</sup>H NMR spectra monitoring the conversion of **2** to **(G)<sub>4</sub>C<sub>3</sub>** in the presence of **G** over different reaction times (400 MHz, 298 K, CD<sub>3</sub>CN, 5 mM ligand concentration at 70 °C).



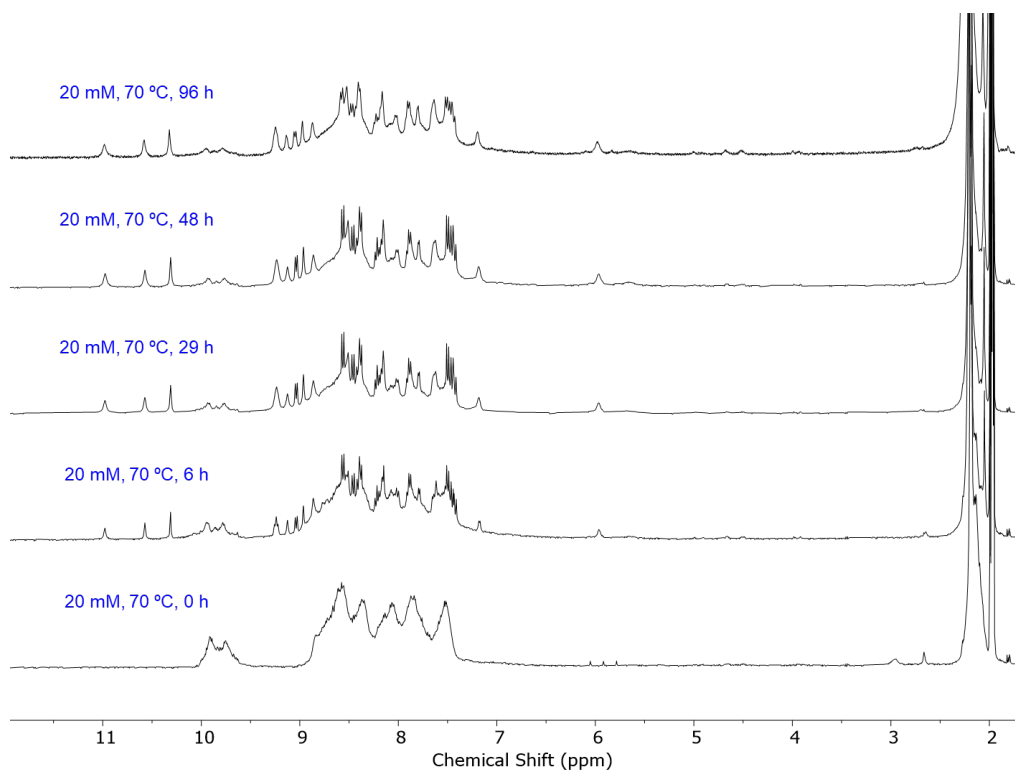

**Figure S41.** <sup>1</sup>H NMR spectra monitoring the conversion of **2** to **(G)<sub>4</sub>C<sub>3</sub>** in the presence of **G** over different reaction times (400 MHz, 298 K, CD<sub>3</sub>CN, 20 mM ligand concentration at 70 °C).

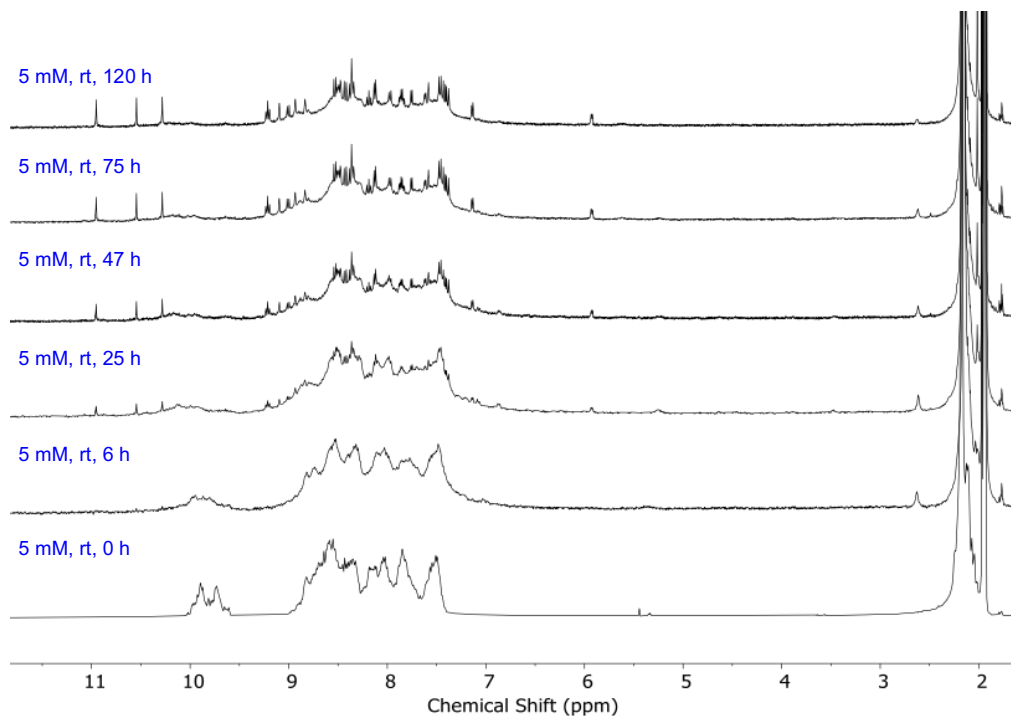

**Figure S42.** <sup>1</sup>H NMR spectra monitoring the conversion of **2** to **(G)<sub>4</sub>C<sub>3</sub>** in the presence of **G** over different reaction times (400 MHz, 298 K, CD<sub>3</sub>CN, 5 mM ligand concentration at room temperature).

### 4.3.3 Crystallographic analysis of interactions between $\text{Zn}^{\text{II}}_6\text{L}_4$ host and guests.

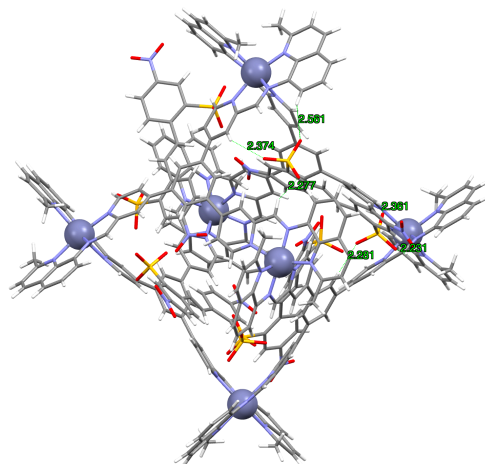

**Figure S43.** Distances between hydrogen atoms on the ligands of cage and oxygen atoms on the sulfonate groups of guests.

The driving force for the binding of negatively-charged guests by positively-charged hosts is primarily electrostatic attraction. The conversion from  $\text{Zn}^{\text{II}}_9\text{L}_6$  to  $\text{Zn}^{\text{II}}_6\text{L}_4$  was realized not only due to electrostatic interactions, but also to van der Waals interactions and hydrogen bonding between the cage and the guests.

In the crystal structure of  $(\mathbf{G})_4\mathbf{C}\mathbf{3}$ , the distances between hydrogen atoms on the host ligands and oxygen atoms on the sulfonate groups of guests are 2.23 to 2.56 Å, less than the 2.6 Å sum of the van der Waals radii, which suggests the existence of hydrogen bonding between them.<sup>2</sup> Evidence for the presence of these interactions in solution is given by NMR spectroscopy, for example by the changes in chemical shift of the imine protons following guest addition (Figures S46, S48, S54 and S56).

## 5. NMR Titrations of Guests with Cage 1

### 5.1 Job Plots of NMR Titrations

#### 5.1.1 Job Plot of Tetrakis(4-chlorophenyl)borate as a Guest for 1

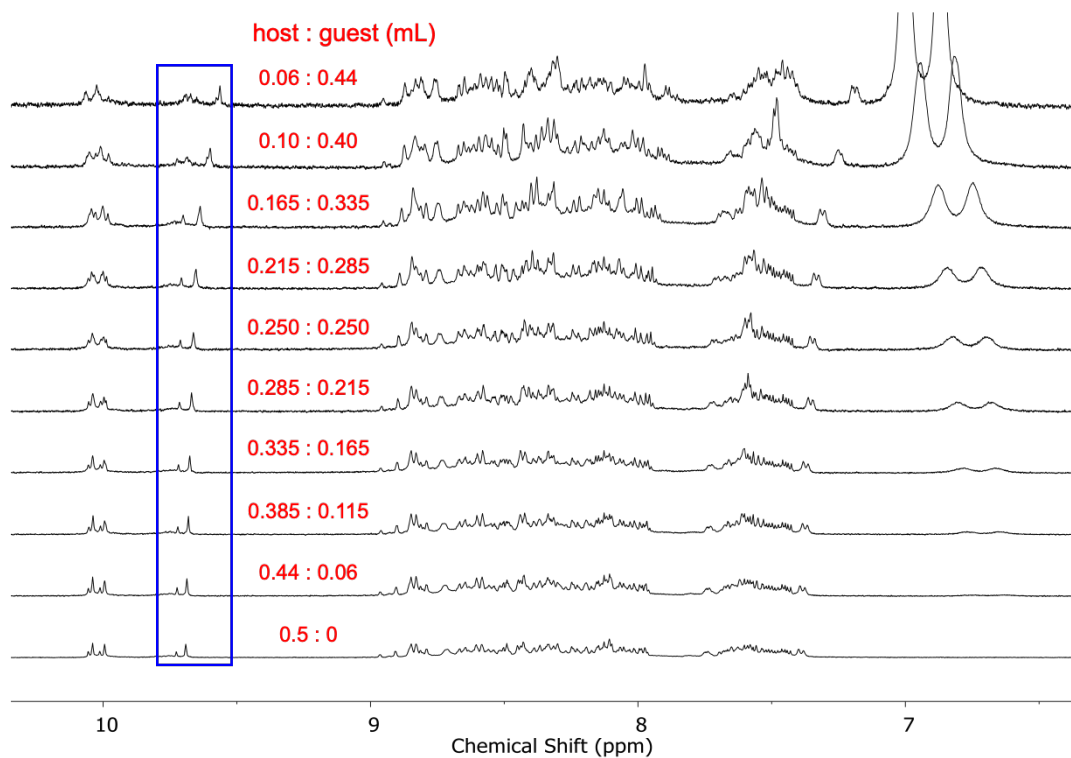

**Figure S44.**  $^1\text{H}$  NMR titration of **1** with  $\text{KB}(p\text{-C}_6\text{H}_4\text{Cl})_4$  (400 MHz, 298 K,  $\text{CD}_3\text{CN}$ , 1.0 mM in both **1** and  $\text{KB}(p\text{-C}_6\text{H}_4\text{Cl})_4$ ).

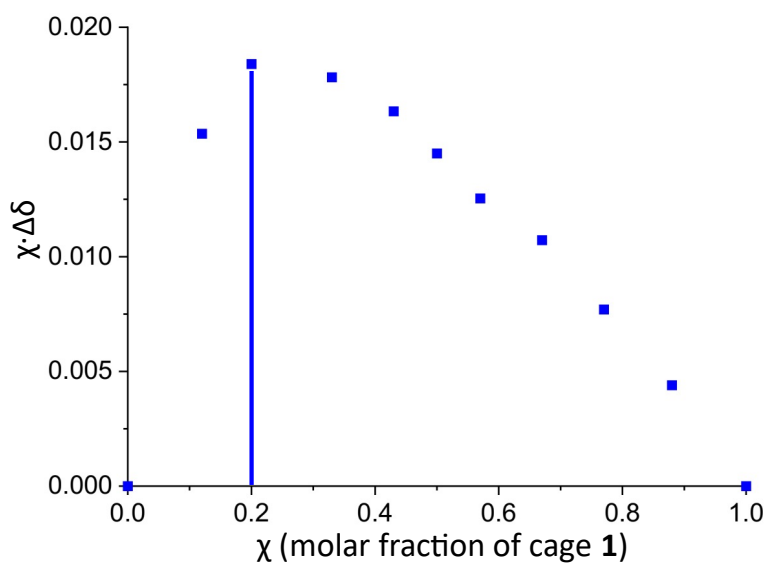

**Figure S45.** Job plot revealed a 1:4 H:G ratio for  $\mathbf{1} \cdot (\text{B}(p\text{-C}_6\text{H}_4\text{Cl})_4^-)_4$ .

5.1.2 Job Plot of Periodate as a Guest for **1**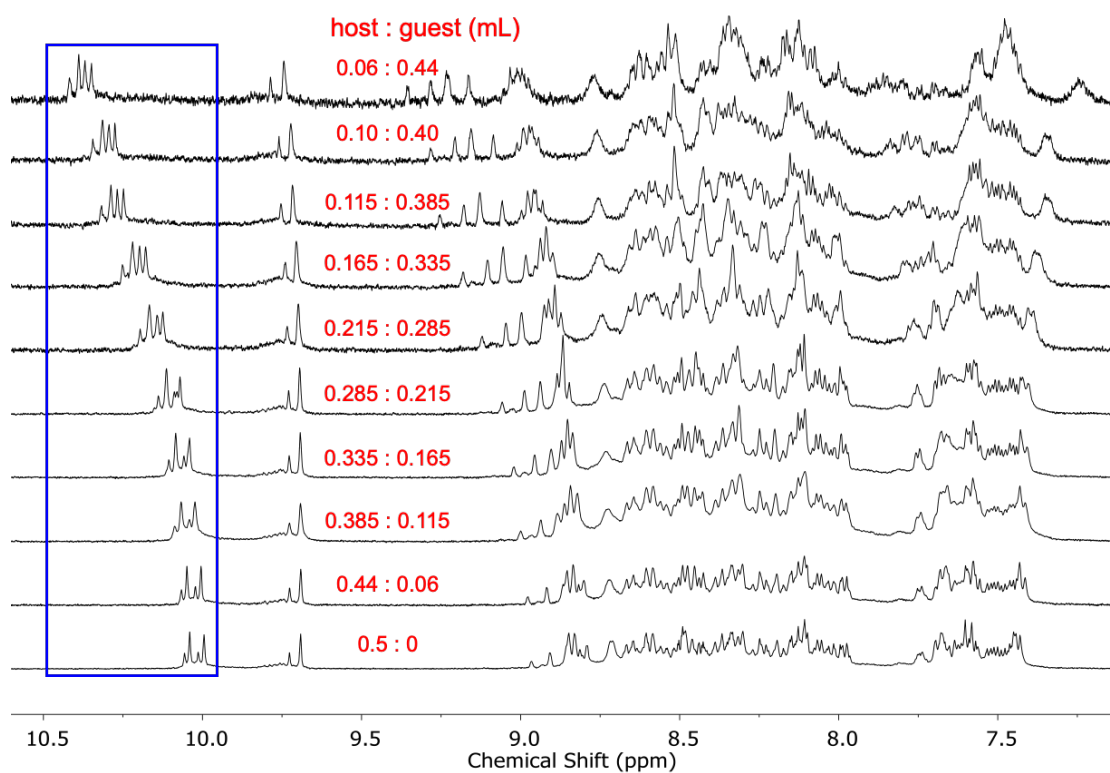

**Figure S46.**  $^1\text{H}$  NMR spectra of titration of **1** with  $\text{TBAIO}_4$  (400 MHz, 298 K,  $\text{CD}_3\text{CN}$ , 1.0 mM in both **1** and  $\text{TBAIO}_4$ ).

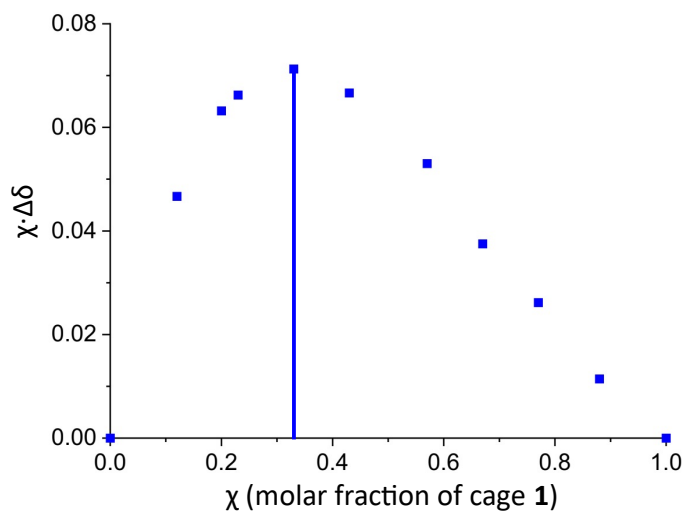

**Figure S47.** Job plot revealed a 1:2 H:G ratio for  $\mathbf{1} \cdot (\text{IO}_4^-)_2$

5.1.3 Job Plot of Perrhenate as a Guest for **1**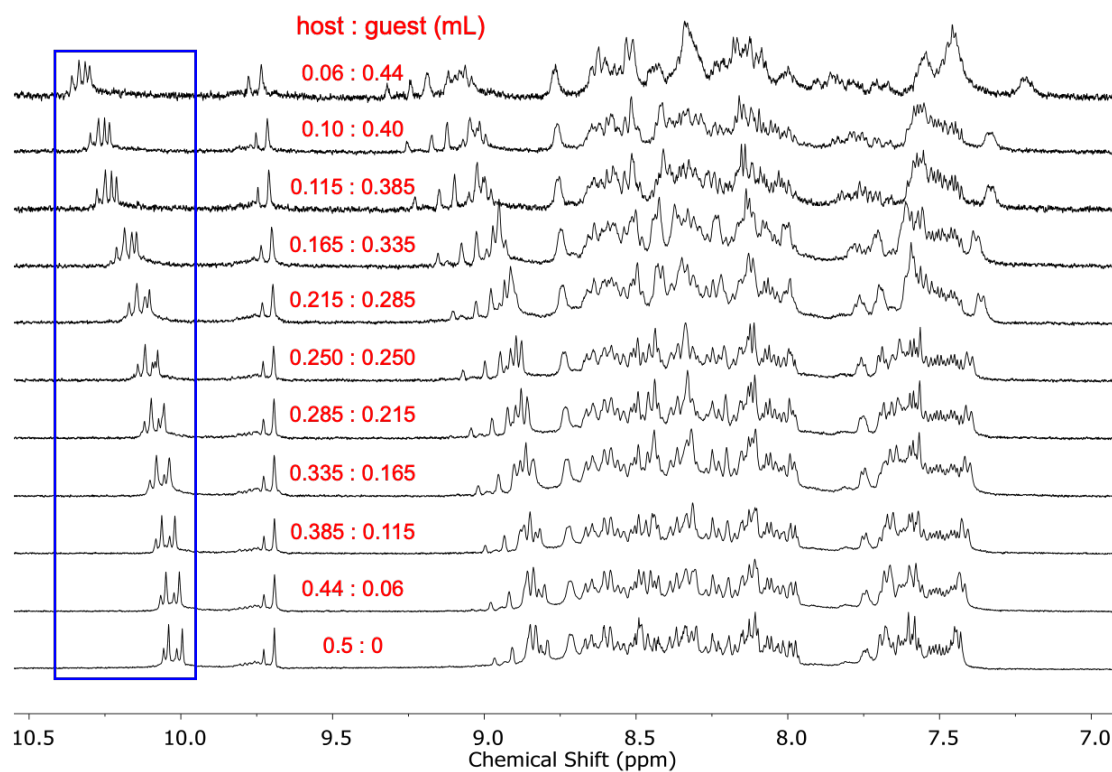

**Figure S48.**  $^1\text{H}$  NMR spectra of titration of **1** with  $\text{TBAREO}_4$  (400 MHz, 298 K,  $\text{CD}_3\text{CN}$ , 1.0 mM in both **1** and  $\text{TBAREO}_4$ ).

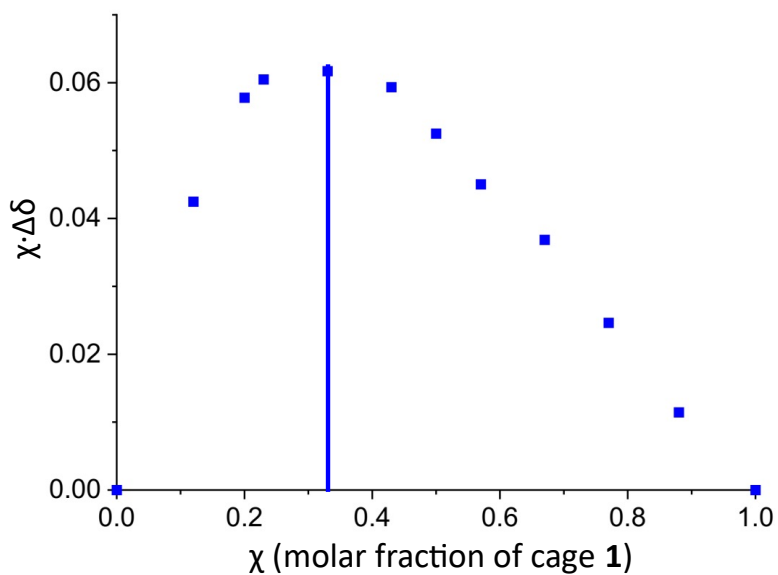

**Figure S49.** Job plot revealed a 1:2 H:G ratio for  $\mathbf{1} \cdot (\text{ReO}_4^-)_2$ .

## 5.2 Hill Equation Analyses of NMR Titrations

The binding behavior of cage **1** was studied by  $^1\text{H}$  NMR titration of  $\text{B}(\text{p-C}_6\text{H}_4\text{Cl})_4^-$ ,  $\text{B}(\text{p-C}_6\text{H}_4\text{F})_4^-$ ,  $\text{ReO}_4^-$ , and  $\text{IO}_4^-$  into solutions of  $\mathbf{1}\cdot(\text{NTf}_2)_{12}$ , respectively. Titration experiments were carried out in  $\text{CD}_3\text{CN}$ . The  $\text{CD}_3\text{CN}$  solution cage **1** (1.0 mM) was prepared. The  $\text{CD}_3\text{CN}$  solution of both corresponding guest (25.0 mM) and cage **1** (1.0 mM) were also prepared and used for the titrations. The  $^1\text{H}$  NMR titration were performed by adding aliquots of guest mixed with cage **1** stock solution to 500  $\mu\text{L}$  of cage **1** stock solution. It was found that guests  $\text{B}(\text{p-C}_6\text{H}_4\text{Cl})_4^-$ ,  $\text{B}(\text{p-C}_6\text{H}_4\text{F})_4^-$ ,  $\text{ReO}_4^-$ , and  $\text{IO}_4^-$  were bound by **1** in fast-exchange on the NMR time scale at 25  $^\circ\text{C}$ .

The binding constant ( $K_a$ ) and coefficient value ( $n$ ) were calculated using the Hill equation.<sup>3</sup>

$$\theta = \frac{[\text{HG}_n]}{[\text{HG}_n] + [\text{H}]} \quad (\text{S1})$$

$$\log \frac{\theta}{1 - \theta} = n \log[\text{G}] + n \log K_a \quad (\text{S2})$$

Where  $\theta$  is the fraction of binding sites occupied by the guest,  $[\text{G}]$  is the guest concentration,  $n$  is the Hill coefficient describing cooperativity, and  $K_a$  is the apparent association constant.

In the Hill equation, the value of  $\theta$  was obtained using Equation S1. For the fast-exchange bound guests:  $\text{B}(\text{p-C}_6\text{H}_4\text{Cl})_4^-$ ,  $\text{B}(\text{p-C}_6\text{H}_4\text{F})_4^-$ ,  $\text{ReO}_4^-$ , and  $\text{IO}_4^-$ , the value of  $\theta$  was obtained by using  $\Delta\delta_{\text{observed}}$  as compared against the maximum change of chemical shift  $\Delta\delta$  of corresponding protons in  $^1\text{H}$  NMR spectra.

Cooperativity is quantified by the Hill coefficient  $n$ , where  $n > 1$  indicates positively cooperative binding,  $n < 1$  indicates negatively cooperative binding, and  $n = 1$  indicates noncooperative binding.

5.2.1 Hill Equation Analysis of Tetrakis(4-chlorophenyl)borate as a Guest for **1**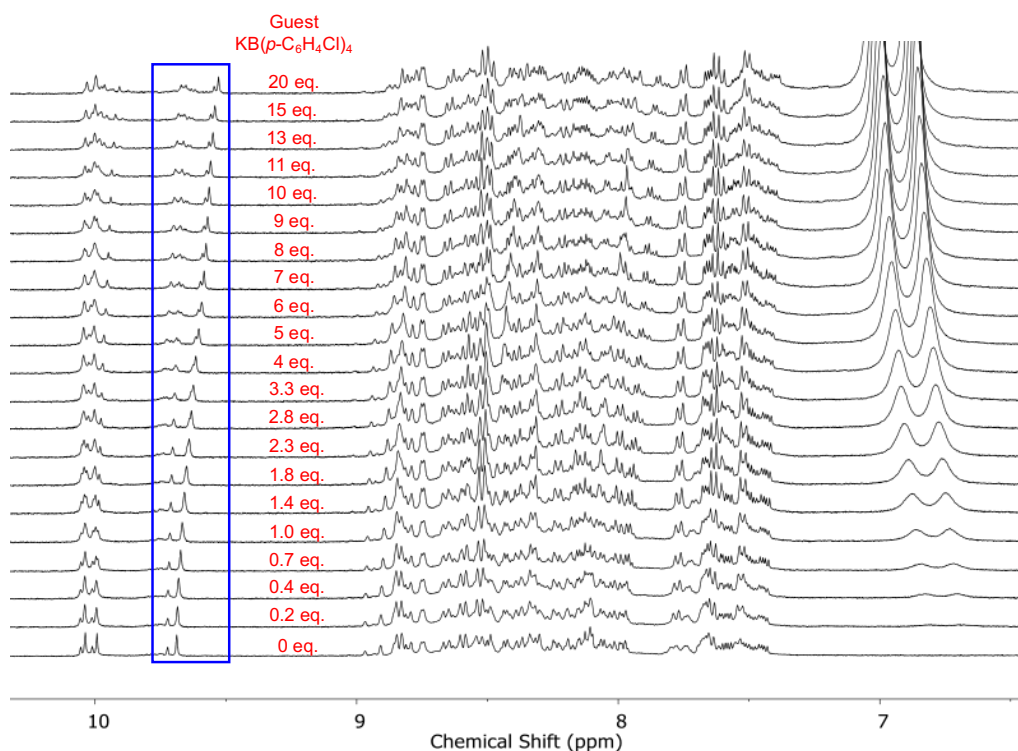

**Figure S50.**  $^1\text{H}$  NMR spectra (400 MHz, 298 K,  $\text{CD}_3\text{CN}$ ) **1** ( $c = 1.0$  mM) upon addition of 0 – 20 equiv of  $\text{KB}(\text{p-C}_6\text{H}_4\text{Cl})_4$ . Guest equivalents with respect to the complete host mixture are given in red.

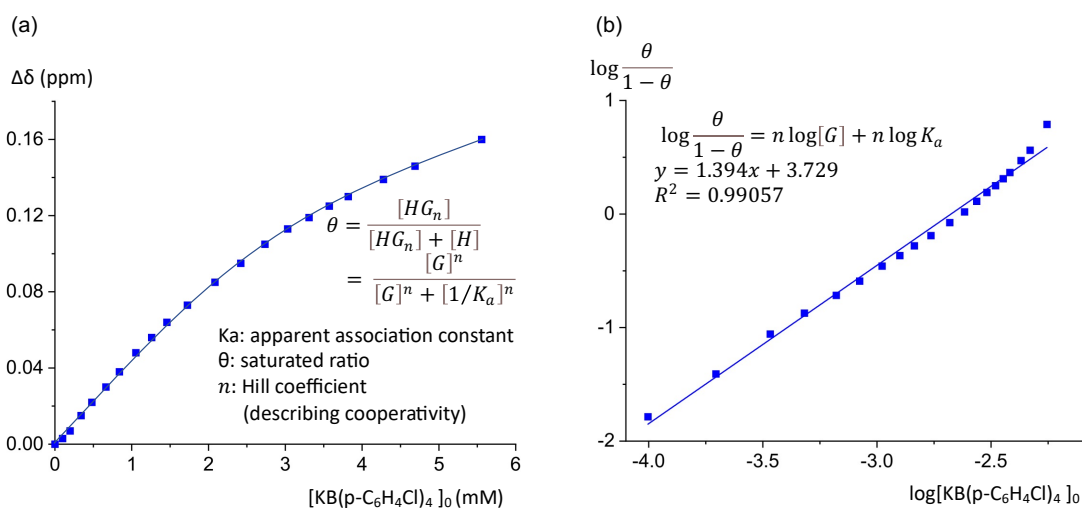

**Figure S51.** Titration curves of **1** vs  $\text{KB}(\text{p-C}_6\text{H}_4\text{Cl})_4$  and Hill function analysis. (a)  $\Delta\delta$  vs  $[\text{KB}(\text{p-C}_6\text{H}_4\text{Cl})_4]_0$  and (b)  $\theta$  vs  $\log[\text{KB}(\text{p-C}_6\text{H}_4\text{Cl})_4]_0$ .

## 5.2.2 Hill Equation Analysis of Tetrakis(4-fluorophenyl)borate as a Guest for 1

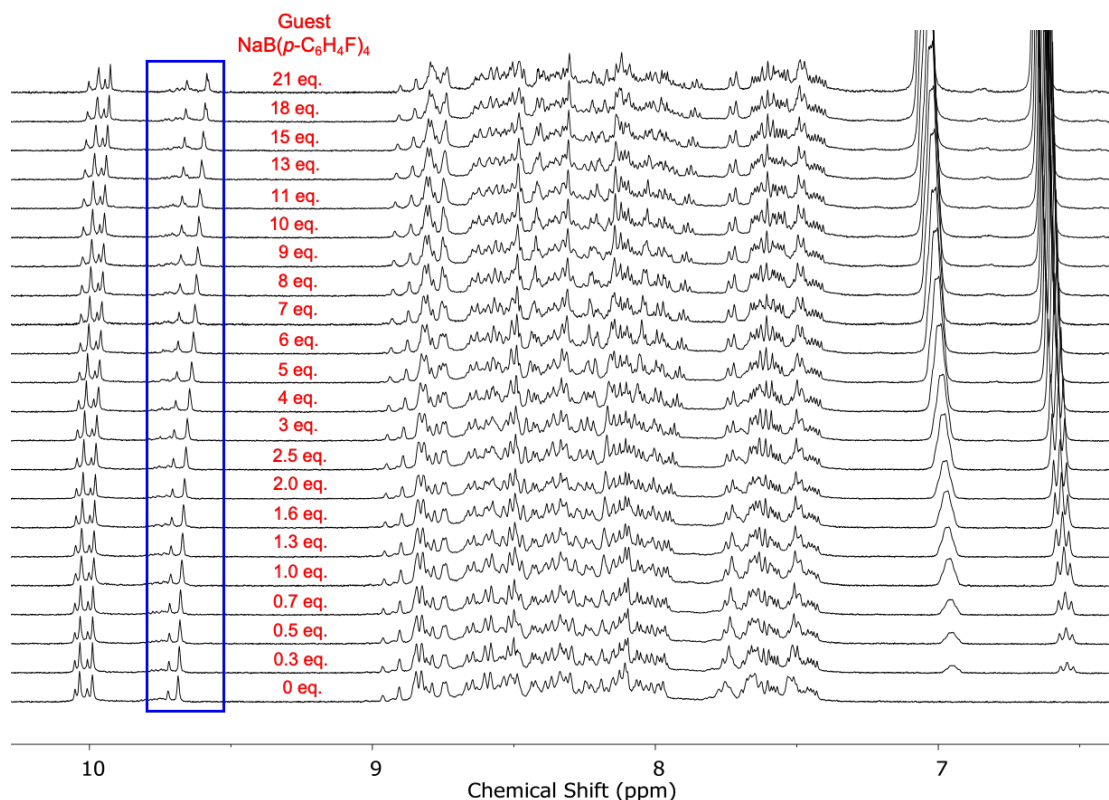

**Figure S52.**  $^1\text{H}$  NMR spectra (400 MHz, 298 K,  $\text{CD}_3\text{CN}$ ) of **1** ( $c = 1.0$  mM) upon addition of 0 – 21 equiv of  $\text{NaB}(\text{p-C}_6\text{H}_4\text{F})_4$ . Guest equivalents with respect to the complete host mixture are given in red.

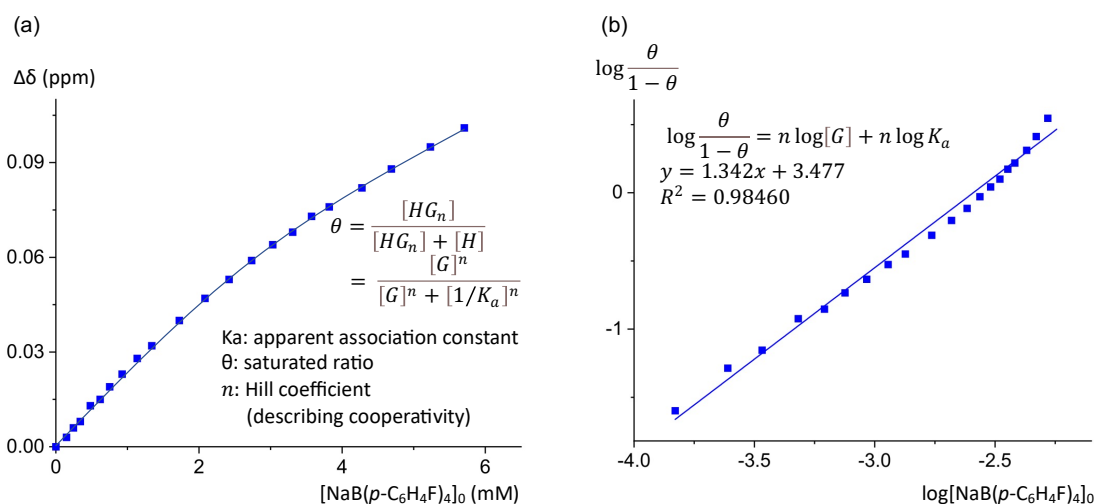

**Figure S53.** Titration curves of **1** vs  $\text{NaB}(\text{p-C}_6\text{H}_4\text{F})_4$  and Hill function analysis. (a)  $\Delta\delta$  vs  $[\text{NaB}(\text{p-C}_6\text{H}_4\text{F})_4]_0$  and (b)  $\theta$  vs  $\log [\text{NaB}(\text{p-C}_6\text{H}_4\text{F})_4]_0$ .



## 5.2.3 Hill Equation Analysis of Perrhenate as a Guest for 1

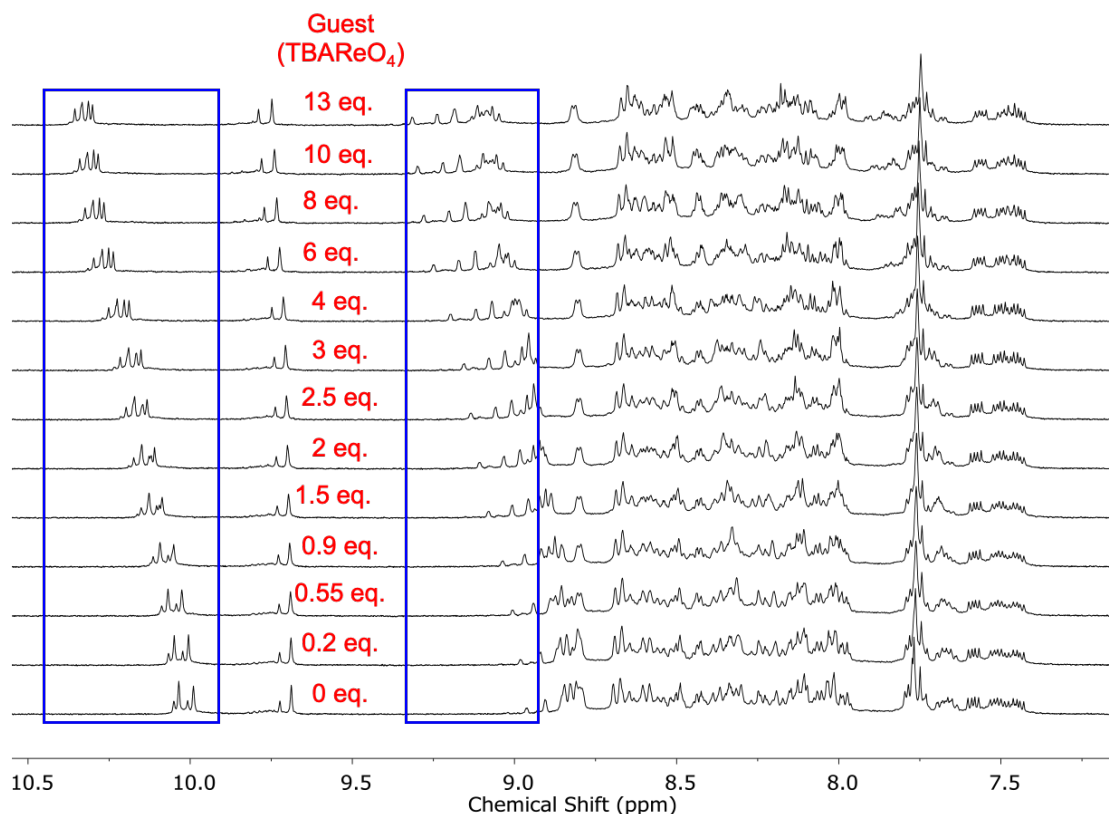

**Figure S54.**  $^1\text{H}$  NMR spectra (400 MHz, 298 K,  $\text{CD}_3\text{CN}$ ) of **1** ( $c = 1.0$  mM) upon addition of 0 – 13 equiv of  $\text{TBAREO}_4$ . Guest equivalents with respect to the complete host mixture are given in red.

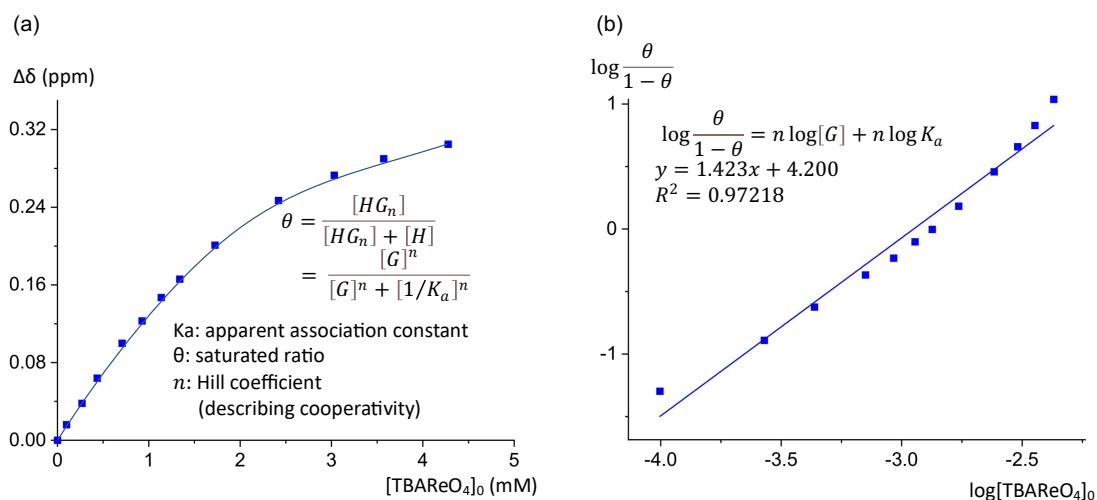

**Figure S55.** Titration curves of **1** vs  $\text{TBAREO}_4$  and Hill function analysis. (a)  $\Delta\delta$  vs [ $\text{TBAREO}_4$ ]<sub>0</sub> and (b)  $\theta$  vs  $\log[\text{TBAREO}_4]_0$ .

## 5.2.4 Hill Equation Analysis of Periodate as a Guest for 1

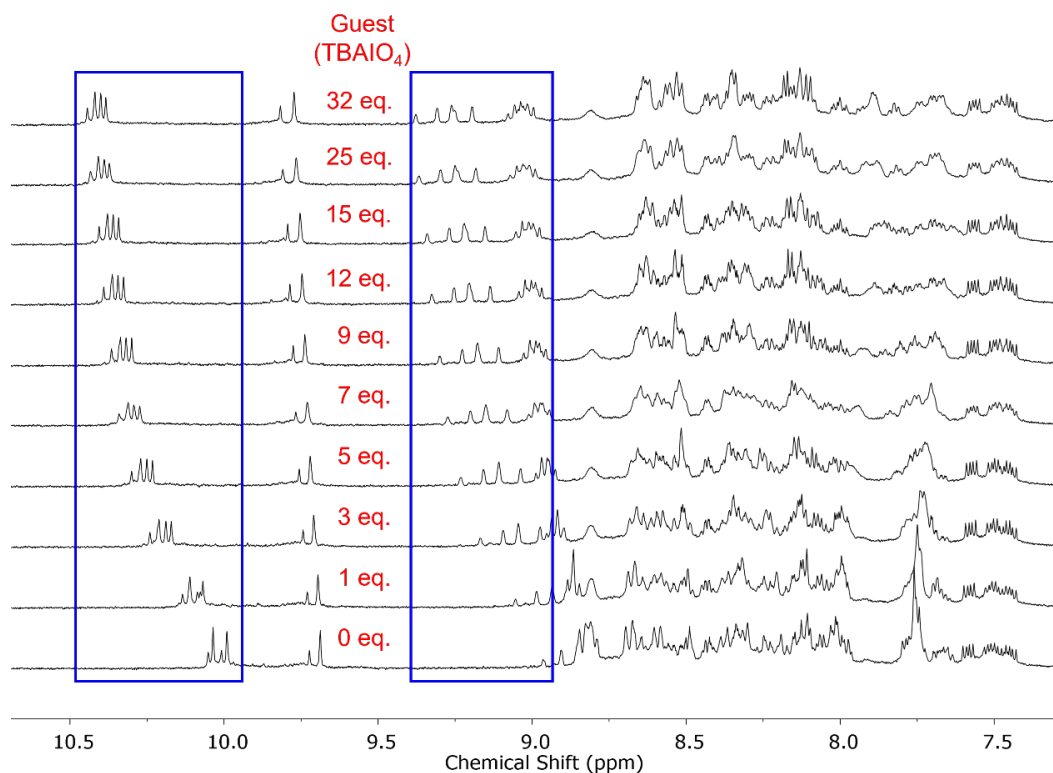

**Figure S56.**  $^1\text{H}$  NMR spectra (400 MHz, 298 K,  $\text{CD}_3\text{CN}$ ) of **1** ( $c = 1.0$  mM) upon addition of 0 – 32 equiv of  $\text{TBAIO}_4$ . Guest equivalents with respect to the complete host mixture are given in red.

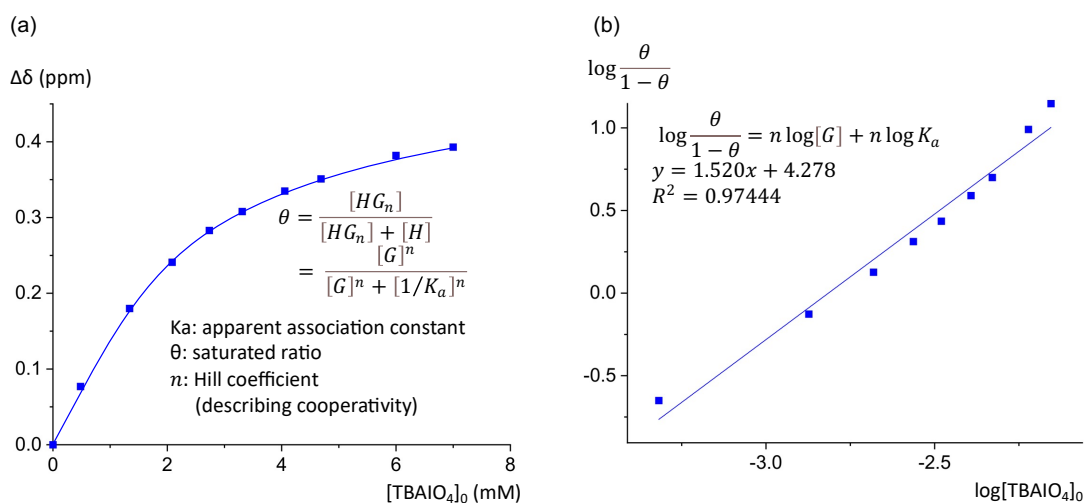

**Figure S57.** Titration curves of **1** vs  $\text{TBAIO}_4$  and Hill function analysis. (a)  $\Delta\delta$  vs  $[\text{TBAIO}_4]_0$  and (b)  $\theta$  vs  $\log[\text{TBAIO}_4]_0$ .

5.2.5 Titration Experiment of Pyrene as a Guest for **1**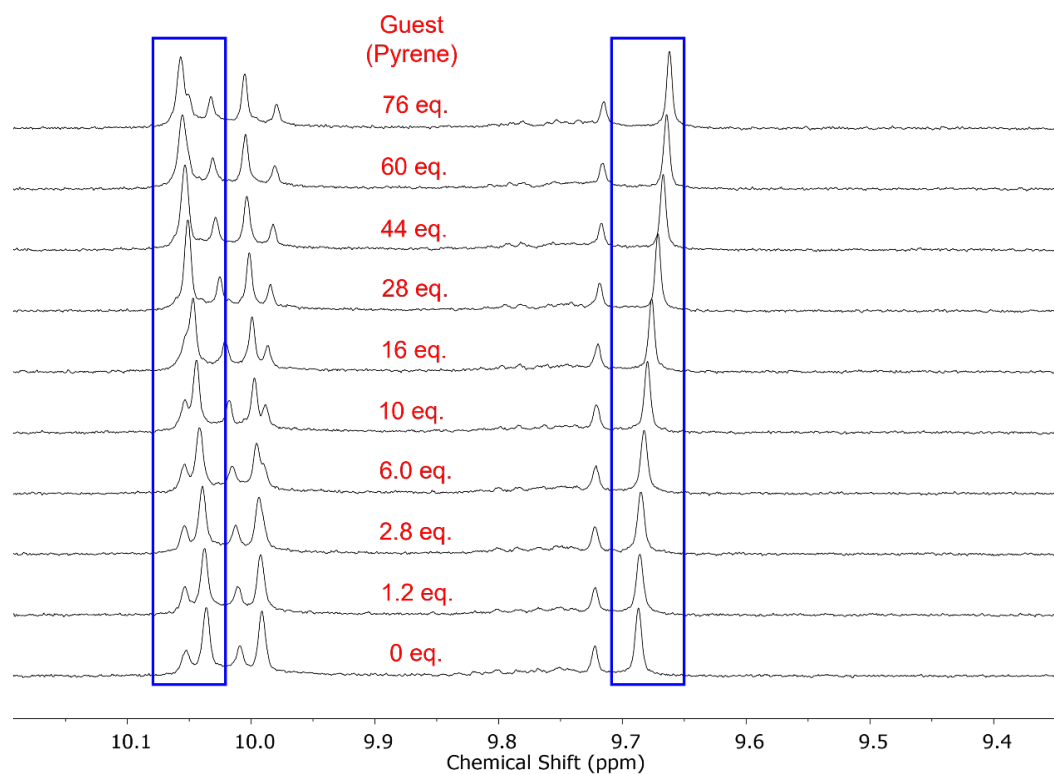

**Figure S58.** <sup>1</sup>H NMR spectra (400 MHz, 298 K, CD<sub>3</sub>CN) of **1** (c = 1.0 mM) upon addition of 0 – 76 equiv of pyrene. Guest equivalents with respect to the complete host mixture are given in red. The precipitate was observed in the process of titration.

## 6 Host–Guest Studies Using Cage 1

### 6.1 Binding Guests for Cage 1

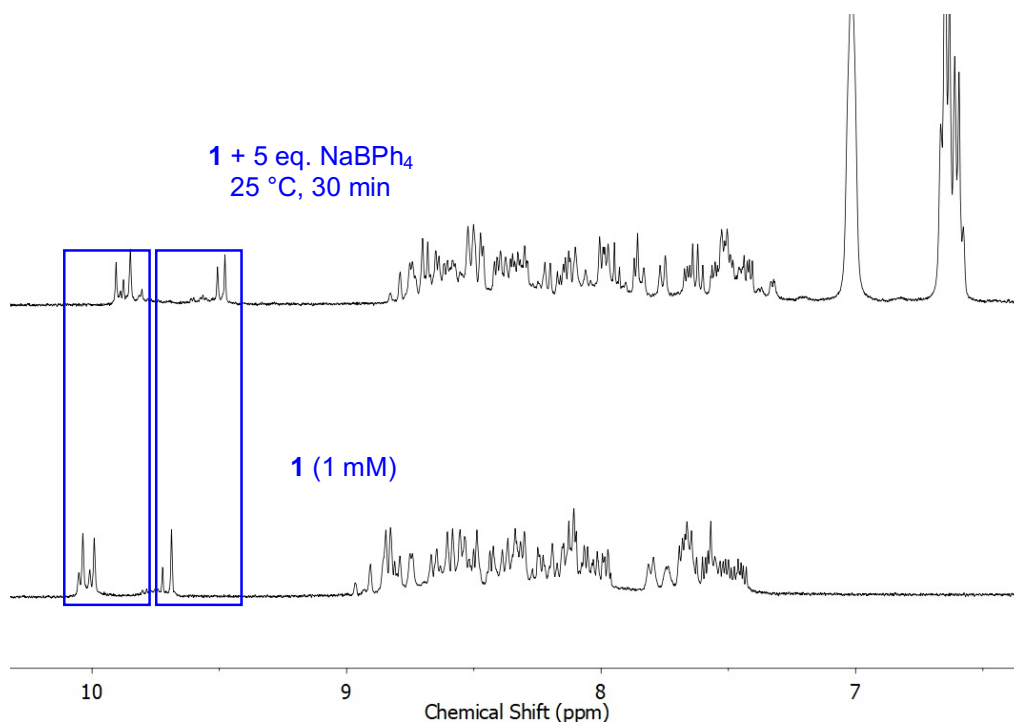

**Figure S59.** <sup>1</sup>H NMR spectra (400 MHz, 298 K, CD<sub>3</sub>CN) of host–guest complex of **1** (top) compared to the free cage **1** (bottom).

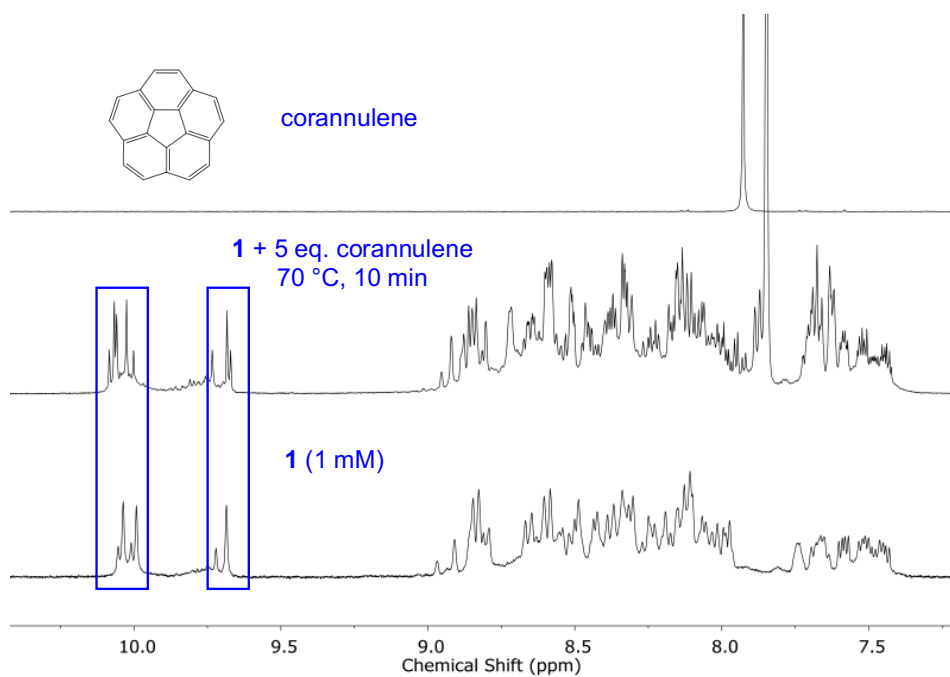

**Figure S60.** <sup>1</sup>H NMR spectra (400 MHz, 298 K, CD<sub>3</sub>CN) of host–guest complex of **1** (middle) compared to the free cage **1** (bottom) and the guest corannulene (top).

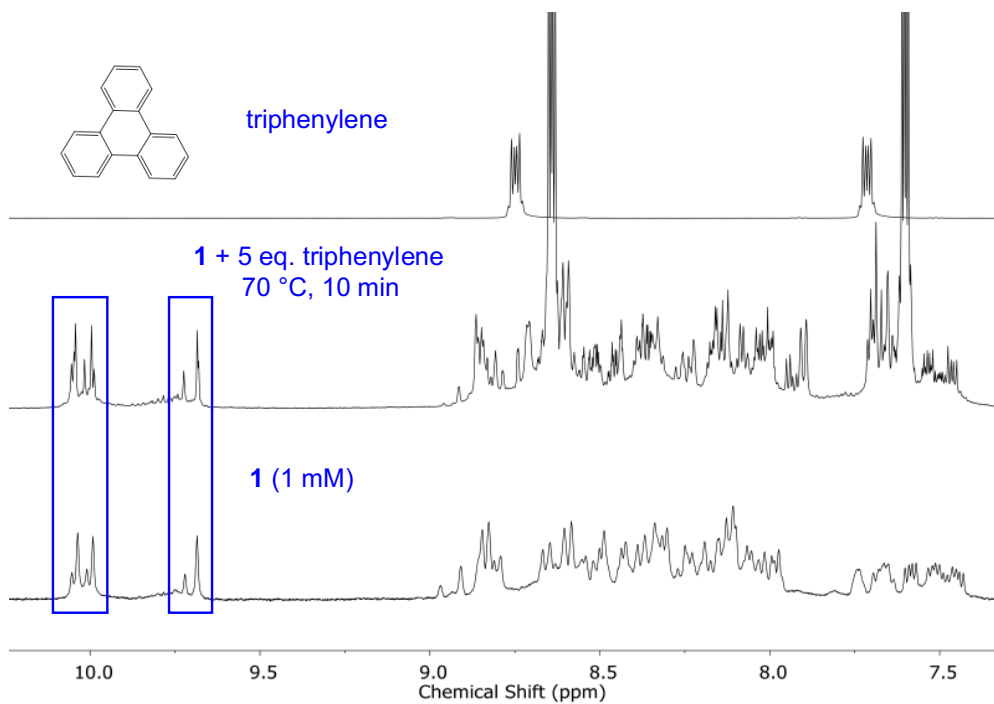

**Figure S61.** <sup>1</sup>H NMR spectra (400 MHz, 298 K, CD<sub>3</sub>CN) of host-guest complex of **1** (middle) compared to the free cage **1** (bottom) and the guest triphenylene (top).

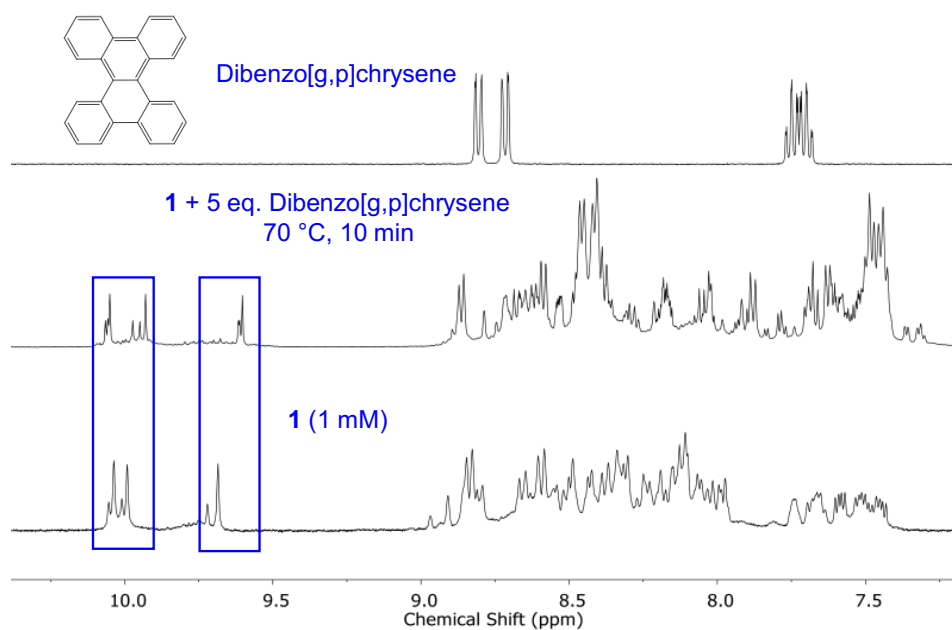

**Figure S62.** <sup>1</sup>H NMR spectra (400 MHz, 298 K, CD<sub>3</sub>CN) of host-guest complex of **1** (middle) compared to the free cage **1** (bottom) and the guest dibenzo[g,p]chrysene (top).

## 6.2 Non-Binding Guests for Cage 1

Prospective guests (2.5  $\mu\text{mol}$ , 5 equiv) and cage **1** (0.5  $\mu\text{mol}$ , 1.0 equiv) were combined in  $\text{CD}_3\text{CN}$  (0.5 mL) in NMR tubes. The reaction mixtures were heated at 70  $^\circ\text{C}$  for 1 hour. After cooling to room temperature,  $^1\text{H}$  NMR spectra were measured. No changes in chemical shift were observed for the following species:

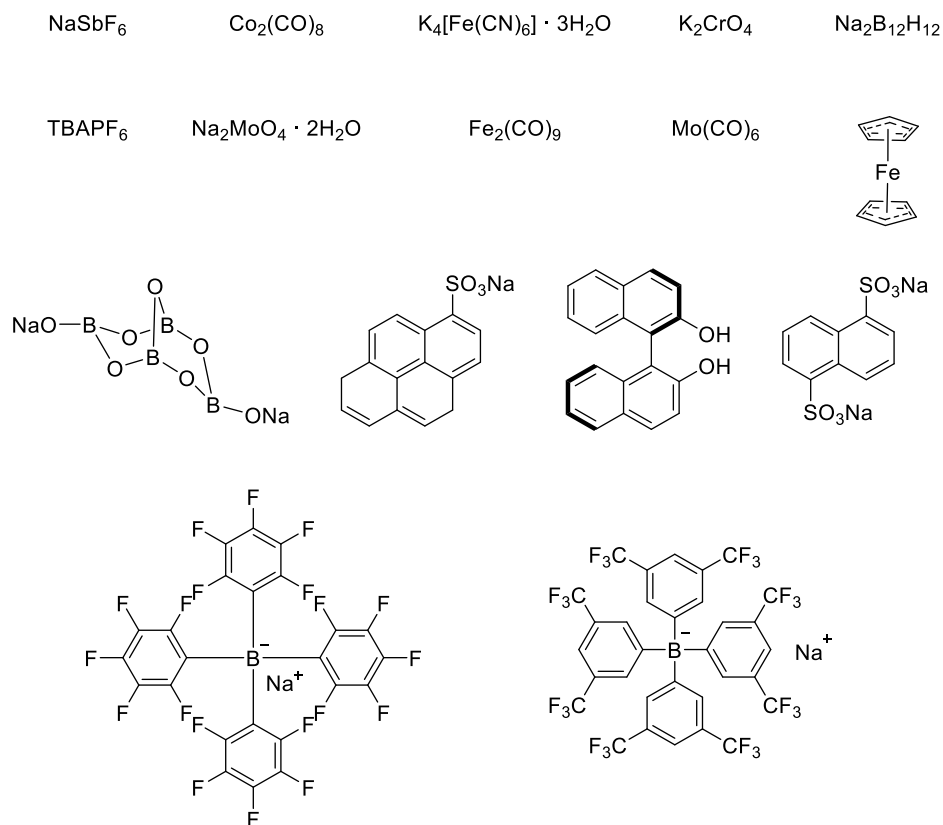

**Figure S63.** Non-binding prospective guests.

## 7 Contrast of Octahedra with Low or High symmetry

**Table S1.** Comparison of different  $C_2$ -symmetric vertices that produce octahedral cages.

| Entry | Cage vertex/metal                                                                                       | Symmetry | Entry | Cage vertex/metal                                                                                        | Symmetry   |
|-------|---------------------------------------------------------------------------------------------------------|----------|-------|----------------------------------------------------------------------------------------------------------|------------|
| 1     | 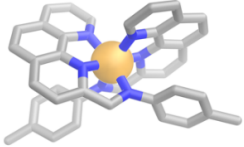<br>Zn <sup>II</sup>   | $T$      | 5     | <br>Ir <sup>III</sup>  | $T$        |
| 2     | <br>Zn <sup>II</sup>  | $T$      | 6     | <br>Cu <sup>I</sup>    | $T$        |
| 3     | <br>Pt <sup>II</sup> | $T$      | 7     | <br>Zn <sup>II</sup> | $S_4, D_2$ |
| 4     | <br>Pd <sup>II</sup> | $T_d$    |       |                                                                                                          |            |

Literature references: entry 1 (*Angew. Chem., Int. Ed.* **2016**, *55*, 7958–7962); entry 2 (*Angew., Chem. Int. Ed.* **2008**, *47*, 877–881); entry 3 (*Angew. Chem., Int. Ed.* **2022**, doi/10.1002/anie.202214577.); entry 4 (*Nat. Chem.* **2020**, *12*, 574–578); entry 5 (*J. Am. Chem. Soc.* **2012**, *134*, 19334–19337); entry 6 (*J. Am. Chem. Soc.* **2022**, *144*, 8467–8473); entry 7 is the vertex of the octahedral cage in this work.

In this work, we introduce the use of the 8-aminoquinoline subcomponent condensing with a tritopic 2-formylpyridine to form ligands where the pyridyl moiety cannot rotate freely due to steric hindrance. The arms in the ligands of other, analogous *pseudo*-octahedra (Table S2, entries 1-6) can rotate freely without any steric hindrance. The torsional steric hindrance of our new ligand, combined with the coordinate geometry of its vertices (Table S2, entry 7) led to the formation of  $M_6L_4$  cages with  $D_2$  and  $S_4$  point symmetries rather than the higher symmetry octahedra (Table S2, entries 1-6).

**Table S2.** Comparison of different ligands that produce octahedral cages.

| Entry | Ligand                                                                              | Symmetry | Entry | Ligand                                                                               | Symmetry   |
|-------|-------------------------------------------------------------------------------------|----------|-------|--------------------------------------------------------------------------------------|------------|
| 1     | 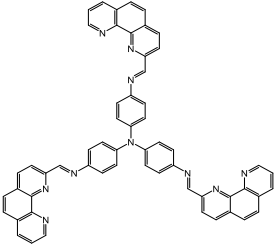   | $T$      | 4     |    | $T_d$      |
| 2     |   | $T$      | 5     |   | $T$        |
| 3     |  | $T$      | 6     |  | $T$        |
|       |                                                                                     |          | 7     |  | $S_4, D_2$ |

Literature references: entry 1 (*Angew. Chem., Int. Ed.* **2016**, *55*, 7958–7962); entry 2 (*Angew., Chem. Int. Ed.* **2008**, *47*, 877–881); entry 3 (*Angew. Chem., Int. Ed.* **2022**, doi/10.1002/anie.202214577.); entry 4 (*Nat. Chem.* **2020**, *12*, 574–578); entry 5 (*J. Am. Chem. Soc.* **2012**, *134*, 19334–19337); entry 6 (*J. Am. Chem. Soc.* **2022**, *144*, 8467–8473); entry 7 is the ligand for the cages in this work.



## 8 X-ray Crystallography

Crystallographic data were deposited with the CCDC (2180301).

**Table S3.** Crystal data and structure refinement for hl426\_sq.

|                                   |                                                                                                                   |                  |
|-----------------------------------|-------------------------------------------------------------------------------------------------------------------|------------------|
| Identification code               | hl426_sq                                                                                                          |                  |
| Empirical formula                 | C <sub>280</sub> H <sub>188</sub> F <sub>24</sub> N <sub>48</sub> O <sub>56</sub> S <sub>16</sub> Zn <sub>6</sub> |                  |
| Formula weight                    | 6481.95                                                                                                           |                  |
| Temperature                       | 100(2) K                                                                                                          |                  |
| Wavelength                        | 0.6889 Å                                                                                                          |                  |
| Crystal system                    | Monoclinic                                                                                                        |                  |
| Space group                       | C 2/c                                                                                                             |                  |
| Unit cell dimensions              | a = 48.950(4) Å                                                                                                   | α = 90°.         |
|                                   | b = 43.9701(16) Å                                                                                                 | β = 128.379(3)°. |
|                                   | c = 30.5721(16) Å                                                                                                 | γ = 90°.         |
| Volume                            | 51583(5) Å <sup>3</sup>                                                                                           |                  |
| Z                                 | 4                                                                                                                 |                  |
| Density (calculated)              | 0.835 Mg/m <sup>3</sup>                                                                                           |                  |
| Absorption coefficient            | 0.363 mm <sup>-1</sup>                                                                                            |                  |
| F(000)                            | 13216                                                                                                             |                  |
| Crystal size                      | 0.030 x 0.030 x 0.030 mm <sup>3</sup>                                                                             |                  |
| Theta range for data collection   | 1.029 to 17.429°.                                                                                                 |                  |
| Index ranges                      | -42 ≤ h ≤ 42, -38 ≤ k ≤ 38, -26 ≤ l ≤ 26                                                                          |                  |
| Reflections collected             | 59056                                                                                                             |                  |
| Independent reflections           | 17700 [R(int) = 0.1059]                                                                                           |                  |
| Completeness to theta = 17.429°   | 99.5%                                                                                                             |                  |
| Absorption correction             | Empirical                                                                                                         |                  |
| Max. and min. transmission        | 1.0 and 0.8834182467612366                                                                                        |                  |
| Refinement method                 | Full-matrix least-squares on F <sup>2</sup>                                                                       |                  |
| Data / restraints / parameters    | 17700 / 2962 / 1661                                                                                               |                  |
| Goodness-of-fit on F <sup>2</sup> | 1.005                                                                                                             |                  |
| Final R indices [I > 2σ(I)]       | R1 = 0.0664, wR2 = 0.1567                                                                                         |                  |
| R indices (all data)              | R1 = 0.1242, wR2 = 0.1660                                                                                         |                  |
| Extinction coefficient            | n/a                                                                                                               |                  |
| Largest diff. peak and hole       | 0.220 and -0.341 e.Å <sup>-3</sup>                                                                                |                  |

Specific refinement details:

The crystals of  $[(C_{14}H_8N_2O_{10}S_2)_4Zn^II_6L_4] \cdot 4NTf_2$  [+ solvent] were grown by diffusion of diethyl ether into an acetonitrile solution of the  $Zn^II_9L_6$  assembly containing 6 equiv. of the disodium salt of 4,4'-dinitrostilbene-2,2'-disulfonic acid. Data were collected at Beamline I19 of Diamond Light Source employing silicon double crystal monochromated synchrotron radiation (0.6889 Å) with  $\omega$  and  $\psi$  scans at 100(2) K.<sup>4</sup> Data integration and reduction were undertaken with Xia2.<sup>5</sup> Subsequent computations were carried out using the WinGX-32 graphical user interface.<sup>6</sup> A multi-scan empirical absorption correction using spherical harmonics was applied to the data using DIALS.<sup>5b</sup> The structure was solved by intrinsic phasing using SHELXT<sup>7</sup> then refined and extended with SHELXL.<sup>8</sup> Carbon-bound hydrogen atoms were included in idealized positions and refined using a riding model. Disorder was modelled using standard crystallographic methods including constraints and restraints where necessary.

The crystals employed immediately lost solvent after removal from the mother liquor and rapid handling prior to flash cooling in liquid nitrogen was required to collect data. Despite these measures and the use of synchrotron radiation few reflections at greater than 1.15 Å resolution were observed and the data were trimmed accordingly. Furthermore, there was a significant drop-off in diffraction intensity after around 1.5 Å resolution resulting in a low ratio of observed/unique reflections. Nevertheless, the quality of the data is far more than sufficient to establish the connectivity of the structure. The asymmetric unit was found to contain one half of a  $Zn^II_6L_4$  assembly and two 4,4'-dinitrostilbene-2,2'-disulfonate guests as well as associated counterions and solvent molecules.

Due to the limited resolution, the bond lengths, and angles of the two chemically identical organic ligands were restrained to be similar to each other (SAME). Likewise, the two 4,4'-dinitrostilbene-2,2'-disulfonate guests were restrained to have similar bond lengths and angles to each other. Additional DFIX restraints were applied to some parts of the structure displaying higher degrees of thermal motion. Thermal parameter restraints (SIMU, RIGU) were applied to all atoms except for zinc to facilitate a stable

anisotropic refinement.

Four additional anions per  $\text{Zn}^{\text{II}}_6\text{L}_4$  assembly (i.e., two per asymmetric unit) are required for charge balance. These anions (included as triflimide in the formula below) were significantly disordered and despite numerous attempts at modelling, including with rigid bodies no satisfactory model for the electron-density associated with them could be found. Therefore, the SQUEEZE<sup>9</sup> function of PLATON<sup>10</sup> was employed to remove the contribution of the electron density associated with the remaining anions and further highly disordered solvent, which gave a potential solvent accessible void of 31083 Å<sup>3</sup> per unit cell (a total of approximately 9478 electrons). Diffuse solvent molecules could not be assigned to acetonitrile or diethyl ether and were therefore not included in the formula. Consequently, the molecular weight and density given above are underestimated.

CheckCIF gives one A and two B level alerts. These alerts mostly result from the limited resolution of the data with one alert also resulting from a short contact between two ligand protons which appears to be a genuine feature of the structure, arising from the preferred conformation of the ligand.

## 9 Volume Calculations

To determine the available void space within the PM7-optimized molecular models<sup>11</sup> of **1-S<sub>4</sub>**, **1-D<sub>2</sub>** and the crystal structure of **3-S<sub>4</sub>**, and the volumes of anions B(p-C<sub>6</sub>H<sub>4</sub>Cl)<sub>4</sub><sup>-</sup> (CCDC, 748991), B(p-C<sub>6</sub>H<sub>4</sub>F)<sub>4</sub><sup>-</sup> (708376), IO<sub>4</sub><sup>-</sup> (2168128), ReO<sub>4</sub><sup>-</sup> (821877), PO<sub>4</sub>(WO<sub>3</sub>)<sub>12</sub><sup>3-</sup> (789283) based on the crystal structures, MoloVol calculations<sup>12</sup> were performed. In each case a virtual probe with the smallest radius such that it would not exit the host cavity during calculations was selected. The standard parameters given below were used and the results are given in Tables S4 and S5.

Optimization depth: 4

**Table S4.** Calculated cavity volumes of the complexes.

| Complex                | Probe radius (Å) | Plot grid spacing | Cavity volume (Å <sup>3</sup> ) |
|------------------------|------------------|-------------------|---------------------------------|
| <b>1-S<sub>4</sub></b> | 2.8              | 0.2               | 411.0                           |
| <b>1-D<sub>2</sub></b> | 2.8              | 0.2               | 452.7                           |
| <b>3-S<sub>4</sub></b> | 2.8              | 0.2               | 558.9                           |

**Table S5.** Calculated Van der Waals volumes of guests.

| Guest                                                             | Probe radius (Å) | Plot grid spacing | Volume (Å <sup>3</sup> ) |
|-------------------------------------------------------------------|------------------|-------------------|--------------------------|
| B(p-C <sub>6</sub> H <sub>4</sub> Cl) <sub>4</sub> <sup>-</sup>   | 0.5              | 0.2               | 386.8                    |
| B(p-C <sub>6</sub> H <sub>4</sub> F) <sub>4</sub> <sup>-</sup>    | 0.5              | 0.2               | 339.6                    |
| IO <sub>4</sub> <sup>-</sup>                                      | 0.2              | 0.2               | 64.2                     |
| ReO <sub>4</sub> <sup>-</sup>                                     | 0.2              | 0.2               | 77.3                     |
| [PO <sub>4</sub> (WO <sub>3</sub> ) <sub>12</sub> ] <sup>3-</sup> | 0.5              | 0.2               | 692.4                    |

## 10 Optimized Structures of $\text{Zn}^{\text{II}}_6\text{L}_4$ and $\text{Zn}^{\text{II}}_9\text{L}_6$ Cages

Geometry optimized structures were modelled at the PM7 level of theory<sup>11</sup> using the program MOPAC2016 (version 21.041W)<sup>13</sup> with the following parameters: RHF (restricted Hartree- Fock Hamiltonian), LBFGS (low memory Broyden-Fletcher-Goldfarb-Shanno procedure), a maximum of 2000 SCF (self-consistent field) iterations and a SCF criterion at  $10^{-4}$  kcal/mol. The cartesian coordinates of these models are given in Tables S8-S13 below.

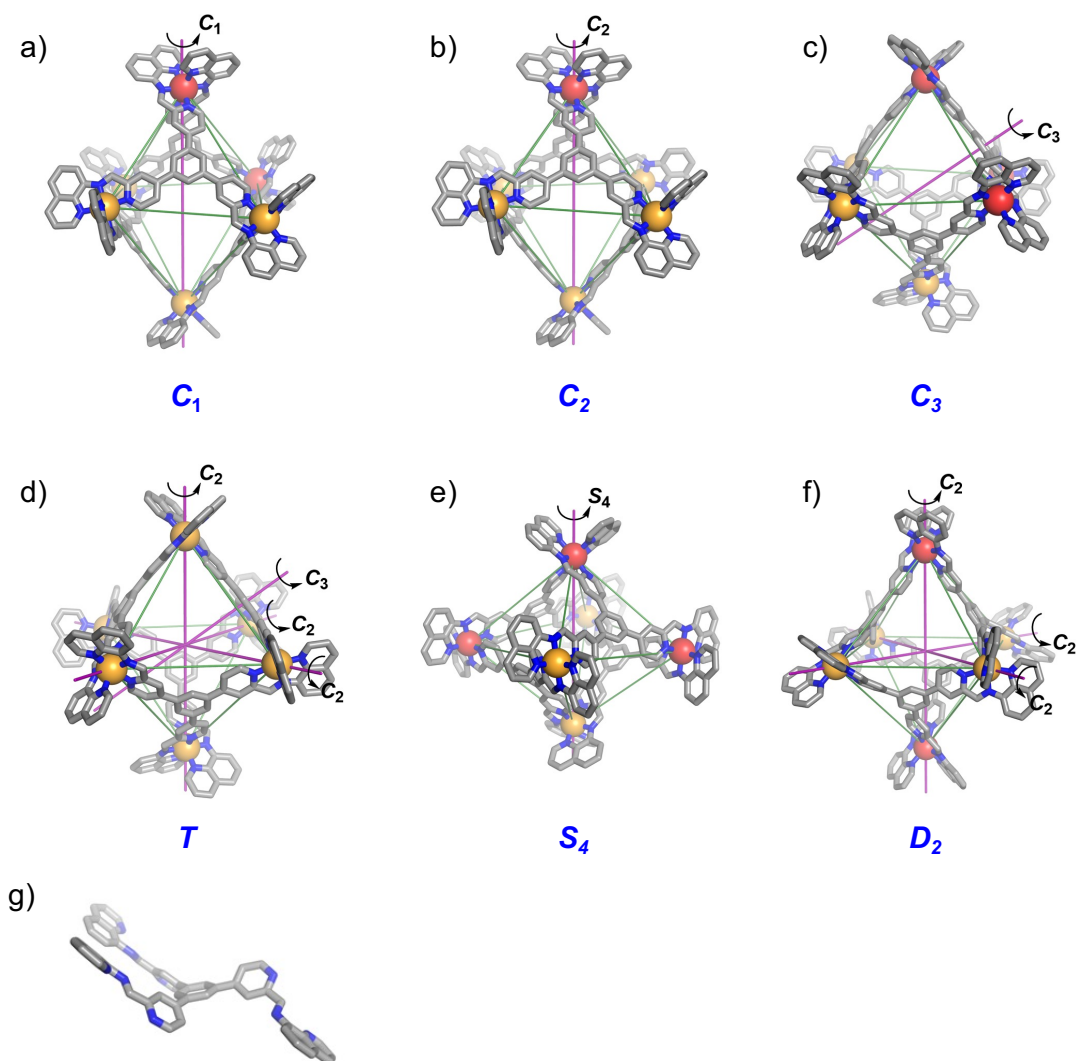

**Figure S64.** PM7-optimized molecular model of all diastereomer of **1** and of the ligand formed when **A** and **B** condense.  $\text{Zn}^{\text{II}}$  centers with  $\Delta$  or  $\Lambda$  configuration are colored yellow and red, respectively. a) **1** with  $C_1$  configuration, b) **1** with  $C_2$  configuration, c) **1** with  $C_3$  configuration, d) **1** with  $T$  configuration, e) **1** with  $S_4$  configuration, f) **1** with  $D_2$  configuration, g) Ligand.

**Table S6.** Antipodal Zn...Zn distances and dihedral angles between phenylene and pyridyl rings on the same ligand for crystal structure and models with different configurations optimized using the PM7<sup>11</sup> force field of Scigress<sup>14</sup>.

| Entry <sup>a</sup> | Configuration                                                                       | Antipodal Zn-Zn (Å) | Antipodal Zn-Zn (Å) | Antipodal Zn-Zn (Å) | Dihedral angles between phenylene and pyridyl rings (°)                           |
|--------------------|-------------------------------------------------------------------------------------|---------------------|---------------------|---------------------|-----------------------------------------------------------------------------------|
| 1                  | Zn <sup>II</sup> L <sub>4</sub> , <i>T</i>                                          | 18.592              | 18.645              | 18.656              | 14.00, 15.14, 17.14                                                               |
| 2                  | Zn <sup>II</sup> L <sub>4</sub> , <i>C</i> <sub>1</sub>                             | 17.665              | 18.618              | 19.399              | 14.75, 16.01, 28.91, 19.67, 22.57, 23.96, 14.09, 15.85, 24.63, 9.70, 22.82, 24.75 |
| 3                  | Zn <sup>II</sup> L <sub>4</sub> , <i>C</i> <sub>2</sub>                             | 17.666              | 18.673              | 19.404              | 16.05, 21.52, 25.23, 9.17, 20.74, 23.55                                           |
| 4                  | Zn <sup>II</sup> L <sub>4</sub> , <i>C</i> <sub>3</sub>                             | 18.428              | 18.514              | 18.698              | 10.82, 16.74, 18.93, 21.86, 22.86, 22.85                                          |
| 5                  | Zn <sup>II</sup> L <sub>4</sub> , <i>D</i> <sub>2</sub>                             | 18.184              | 19.497              | 20.346              | <b>37.35, 40.40, 40.87</b>                                                        |
| 6                  | Zn <sup>II</sup> L <sub>4</sub> , <i>S</i> <sub>4</sub>                             | 16.067              | 19.727              | 20.154              | <b>19.66, 33.03, 37.00</b>                                                        |
| 7 <sup>b</sup>     | <b>3</b> - <i>S</i> <sub>4</sub> (crystal)                                          | 16.069              | 20.551              | 20.641              | <b>16.43, 33.23, 35.38</b>                                                        |
| 8 <sup>c</sup>     | 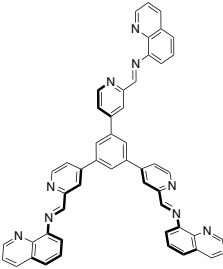 | -                   | -                   | -                   | <b>41.06, 52.76, 54.43</b>                                                        |

<sup>a</sup>8-aminoquinoline **B** as subcomponent was incorporated. <sup>b</sup>2-methyl-8-aminoquinoline **C** was incorporated as subcomponent; the structure of **3**-*S*<sub>4</sub> is the structure of the crystal (**G**)<sub>4</sub>**C**3 with guests removed. <sup>c</sup>Free ligand for the construction of cage by the condensation of **A** and **B**.

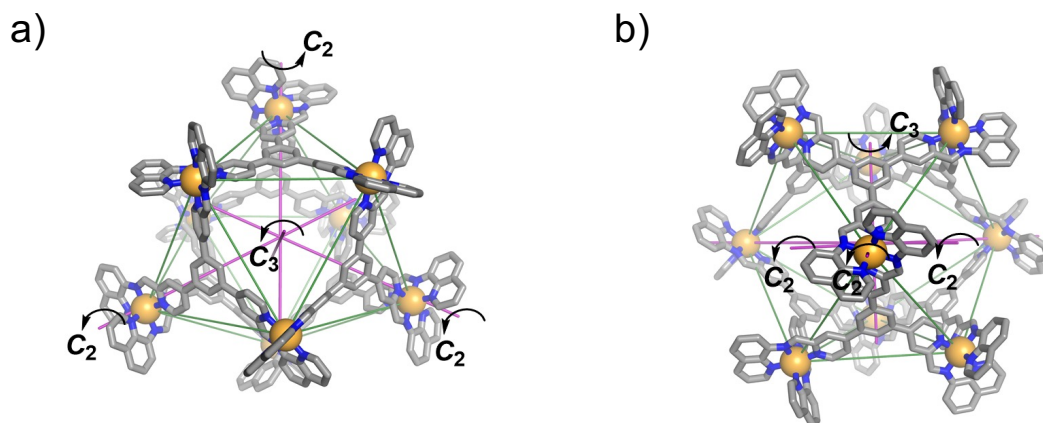

**Figure S65.** PM7-optimized molecular model of Zn<sup>II</sup><sub>9</sub>L<sub>6</sub> with  $D_3$  symmetry (**A** and **B** as subcomponents). Zinc atoms, all having the  $\Delta$  configuration, are colored yellow. a) View down the  $C_3$  axis, b) View down the  $C_2$  axis.

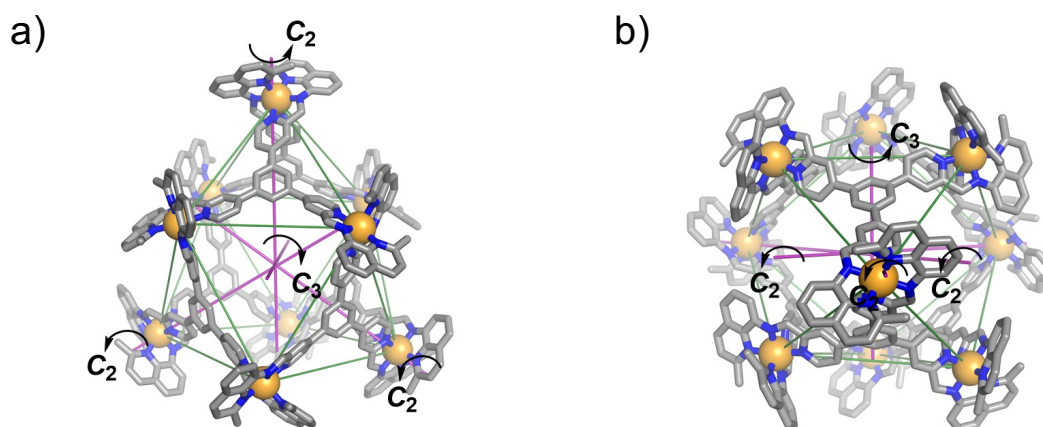

**Figure S66.** PM7-optimized molecular model of Zn<sup>II</sup><sub>9</sub>L<sub>6</sub> **2** with  $D_3$  symmetry (**A** and **C** as subcomponents). Zinc atoms, all having the  $\Delta$  configuration, are colored yellow. a) View down the  $C_3$  axis, b) View down the  $C_2$  axis.

**Table S7.** Dihedral angles between phenylene and pyridyl rings on the same ligand between  $D_3$ -symmetric  $Zn^{II}_9L_6$  cages and  $S_4$ -symmetric  $Zn^{II}_6L_4$  cages, incorporating 8-aminoquinoline **B** or 2-methyl-8-aminoquinoline **C**, optimized using PM7 force field of Scigress<sup>14</sup>.

| Entry          | Cage                               | Dihedral angles phenylene and pyridyl rings (°)                                                                             | Dihedral angles between quinoline and pyridyl rings |
|----------------|------------------------------------|-----------------------------------------------------------------------------------------------------------------------------|-----------------------------------------------------|
| 1 <sup>a</sup> | $Zn^{II}_6L_4$ , $S_4$             | 19.66, 33.03, 37.00                                                                                                         | 14.1                                                |
| 2 <sup>b</sup> | <b>3</b> - $S_4$ (methyl, crystal) | 16.43, 33.23, 35.38                                                                                                         | 11.3                                                |
| 3 <sup>a</sup> | $Zn^{II}_9L_6$                     | 4.97, 11.10, 28.00; 2.19, 19.50, 28.37; 4.27, 22.93, 35.14; 5.55, 26.00, 40.41; 17.28, 29.05, 41.22; 12.95, 31.58, 42.26    | 0.6                                                 |
| 4 <sup>b</sup> | $Zn^{II}_9L_6$ (methyl)            | 14.10, 18.34, 32.88; 2.13, 19.10, 38.13; 19.36, 30.14, 36.88; 20.20, 32.66, 40.20; 19.94, 28.53, 43.22; 14.96, 34.22, 46.46 | 25.5                                                |

<sup>a</sup>8-aminoquinoline **B** was used as subcomponent. <sup>b</sup>2-methyl-8-aminoquinoline **C** was incorporated as subcomponent. <sup>c</sup>The quinoline and pyridyl ring is on the same arm of the ligand.

Note: The introduction of methyl group, which led to the formation of a  $Zn^{II}_9L_6$  framework, appears to lead to larger dihedral angles between quinolines and pyridyl rings (Table S7, entries 3-4), rendering the cage vertices more twisted. In comparing the dihedral angles between phenylene and pyridyl rings of the models (Table S7, entries 3-4), the introduction of methyl group during the construction of  $Zn^{II}_9L_6$  also appears to increase the dihedral angles, leading to a reduction the steric hindrance between phenylene and pyridyl rings. Therefore, the presence of methyl groups introduces a twist into the vertices of cages, as the dihedral angles between quinolines and pyridyl rings become larger in  $Zn^{II}_9L_6$  structure, and further affects the dihedral angles between phenylene and pyridyl rings, resulting in the reduction of steric hindrance. The analysis of previously-published structures (Table S7, entries 1-2) also suggests that the introduction of methyl groups would be unfavorable to the formation of  $M_6L_4$  architectures.



**Table S8.** Cartesian coordinates (in Å) for the PM7 model of **1** with  $C_1$  symmetry

|   |         |         |         |    |         |         |         |   |         |          |         |
|---|---------|---------|---------|----|---------|---------|---------|---|---------|----------|---------|
| C | 6.0186  | -6.4085 | -5.3179 | C  | 1.3544  | -4.362  | 10.8422 | H | 7.4084  | -8.4354  | -4.1261 |
| C | 6.8566  | -5.8495 | -4.4375 | C  | 1.5476  | -3.9919 | 9.5119  | H | 4.5664  | -11.5726 | -4.8498 |
| C | 7.0692  | -4.3937 | -4.4782 | N  | 4.7906  | -5.4663 | 8.8768  | H | 3.7872  | -7.6131  | -6.3175 |
| N | 6.4736  | -3.6475 | -5.326  | C  | 5.7155  | -6.1492 | 9.4405  | C | -5.1332 | -6.9376  | -1.8316 |
| C | 5.6704  | -4.146  | -6.2062 | C  | 5.6209  | -6.596  | 10.8424 | C | -4.6901 | -7.4542  | -3.0548 |
| C | 5.4093  | -5.4627 | -6.2761 | C  | 4.5358  | -6.2771 | 11.544  | C | -4.2801 | -8.7845  | -3.1984 |
| C | 5.0043  | -3.1861 | -7.1427 | H  | 4.9964  | -3.3571 | 2.0713  | C | -4.3769 | -9.6242  | -2.0829 |
| N | 5.2676  | -1.946  | -6.9773 | H  | 5.8773  | -4.4153 | 4.178   | C | -4.8764 | -9.1683  | -0.8577 |
| C | 4.9336  | -0.8266 | -7.504  | H  | 1.5168  | -2.2748 | 4.4483  | C | -5.2416 | -7.8214  | -0.7516 |
| C | 5.5031  | 0.3525  | -6.9395 | H  | 1.3662  | -2.9614 | 6.8184  | H | -3.991  | -10.6502 | -2.1468 |
| C | 5.1593  | 1.5988  | -7.4861 | H  | 2.1628  | -5.3943 | 12.5617 | H | -5.5776 | -7.4429  | 0.2215  |
| C | 4.2748  | 1.6756  | -8.5649 | H  | 0.4312  | -4.065  | 11.3679 | H | -4.6159 | -6.7847  | -3.9193 |
| C | 3.7221  | 0.5177  | -9.1103 | H  | 0.7723  | -3.4042 | 8.997   | C | 4.8417  | -12.8633 | 2.4137  |
| C | 4.0481  | -0.7307 | -8.5813 | H  | 6.6135  | -6.4124 | 8.86    | C | 4.5309  | -13.7156 | 1.4302  |
| N | 6.3191  | 0.2421  | -5.9381 | H  | 6.4375  | -7.1826 | 11.2931 | C | 5.6017  | -14.2173 | 0.5537  |
| C | 6.8554  | 1.2714  | -5.3972 | H  | 4.4207  | -6.5895 | 12.5948 | N | 6.8187  | -13.8601 | 0.7014  |
| C | 6.5833  | 2.641   | -5.8704 | C  | 3.3543  | -8.9898 | 5.2954  | C | 7.1683  | -13.0583 | 1.6516  |
| C | 5.7516  | 2.8104  | -6.8955 | C  | 2.3897  | -8.2125 | 5.8049  | C | 6.2816  | -12.5479 | 2.5235  |
| H | 7.3645  | -6.4269 | -3.6518 | C  | 2.7449  | -6.9017 | 6.3728  | C | 8.6153  | -12.6809 | 1.7275  |
| H | 7.7377  | -3.9337 | -3.7339 | N  | 3.9482  | -6.4771 | 6.394   | N | 9.3825  | -13.1606 | 0.824   |
| H | 4.7091  | -5.8249 | -7.0422 | C  | 4.9139  | -7.1946 | 5.9249  | C | 10.6195 | -13.096  | 0.4972  |
| H | 4.3086  | -3.5354 | -7.9206 | C  | 4.7123  | -8.4116 | 5.3906  | C | 11.024  | -13.8213 | -0.662  |
| H | 4.0094  | 2.6577  | -8.9899 | C  | 6.2897  | -6.6065 | 5.9821  | C | 12.3698 | -13.7697 | -1.0571 |
| H | 3.0243  | 0.59    | -9.9617 | N  | 6.3928  | -5.4333 | 6.4799  | C | 13.2916 | -13.0193 | -0.3228 |
| H | 3.6033  | -1.6363 | -9.0212 | C  | 7.3198  | -4.5794 | 6.7108  | C | 12.8872 | -12.3124 | 0.8088  |
| H | 7.5446  | 1.131   | -4.5499 | C  | 6.9301  | -3.3418 | 7.3021  | C | 11.5547 | -12.3483 | 1.2181  |
| H | 7.0639  | 3.5024  | -5.3796 | C  | 7.9161  | -2.3791 | 7.569   | N | 10.1395 | -14.5034 | -1.3203 |
| H | 5.5177  | 3.8153  | -7.2837 | C  | 9.2543  | -2.636  | 7.2603  | C | 10.4534 | -15.1686 | -2.3684 |
| C | 3.4951  | -1.4153 | -1.8405 | C  | 9.6266  | -3.8491 | 6.6828  | C | 11.8299 | -15.2032 | -2.8953 |
| C | 2.9538  | -1.5835 | -3.0514 | C  | 8.6631  | -4.8186 | 6.4068  | C | 12.7767 | -14.5192 | -2.2572 |
| C | 3.842   | -1.6346 | -4.2248 | N  | 5.6789  | -3.1395 | 7.5758  | H | 3.4975  | -14.0231 | 1.2152  |
| N | 5.1108  | -1.5276 | -4.1184 | C  | 5.2804  | -2.0447 | 8.1072  | H | 5.3366  | -14.8909 | -0.2761 |
| C | 5.6709  | -1.342  | -2.9693 | C  | 6.2079  | -0.9481 | 8.4401  | H | 6.6403  | -11.86   | 3.3021  |
| C | 4.9638  | -1.2622 | -1.8308 | C  | 7.5036  | -1.1042 | 8.1789  | H | 8.9899  | -12.0042 | 2.5104  |
| C | 7.1645  | -1.2516 | -2.9406 | H  | 1.3284  | -8.4949 | 5.803   | H | 14.347  | -12.9822 | -0.6391 |
| N | 7.768   | -1.3922 | -4.0582 | H  | 1.9438  | -6.2623 | 6.7755  | H | 13.623  | -11.7215 | 1.38    |
| C | 8.9748  | -1.4063 | -4.4876 | H  | 5.5813  | -8.9649 | 5.0093  | H | 11.2489 | -11.7834 | 2.1119  |
| C | 9.1639  | -1.6235 | -5.8839 | H  | 7.1639  | -7.1575 | 5.6033  | H | 9.6697  | -15.7344 | -2.8961 |
| C | 10.4718 | -1.6495 | -6.3929 | H  | 10.0239 | -1.8762 | 7.474   | H | 12.0618 | -15.7864 | -3.8009 |
| C | 11.5639 | -1.4659 | -5.541  | H  | 10.6862 | -4.0418 | 6.444   | H | 13.8195 | -14.5145 | -2.6145 |
| C | 11.3696 | -1.2562 | -4.1765 | H  | 8.9716  | -5.7716 | 5.9505  | C | 6.8343  | -11.0346 | -3.5036 |
| C | 10.0791 | -1.227  | -3.6494 | H  | 4.2086  | -1.9164 | 8.3248  | C | 7.6121  | -10.5922 | -2.51   |
| N | 8.126   | -1.7927 | -6.6429 | H  | 5.8275  | -0.0204 | 8.8972  | C | 8.162   | -11.5663 | -1.5527 |
| C | 8.2456  | -1.9911 | -7.9021 | H  | 8.2342  | -0.312  | 8.4108  | N | 7.9149  | -12.8164 | -1.644  |
| C | 9.5593  | -2.0414 | -8.5696 | Zn | 4.6647  | -4.7479 | 7.0409  | C | 7.2002  | -13.2881 | -2.6104 |
| C | 10.6571 | -1.8744 | -7.8359 | C  | -5.3677 | -5.4667 | -1.6523 | C | 6.6613  | -12.5003 | -3.5537 |
| H | 1.8742  | -1.7344 | -3.1985 | C  | -4.9885 | -4.5625 | -2.564  | C | 6.9468  | -14.763  | -2.6211 |
| H | 3.3999  | -1.8062 | -5.2186 | C  | -5.0915 | -3.131  | -2.2401 | N | 7.4321  | -15.4332 | -1.6476 |
| H | 5.4982  | -1.1132 | -0.8813 | N  | -5.5308 | -2.7246 | -1.113  | C | 7.4476  | -16.6511 | -1.251  |

---

|    |         |          |         |   |          |         |         |    |         |          |          |
|----|---------|----------|---------|---|----------|---------|---------|----|---------|----------|----------|
| H  | 7.7109  | -1.0929  | -1.9984 | C | -5.9423  | -3.5579 | -0.2172 | C  | 8.1309  | -16.9267 | -0.0305  |
| H  | 12.5886 | -1.488   | -5.9473 | C | -5.9121  | -4.8875 | -0.4058 | C  | 8.1655  | -18.2483 | 0.441    |
| H  | 12.239  | -1.1143  | -3.5125 | C | -6.4238  | -2.9846 | 1.0792  | C  | 7.5399  | -19.2701 | -0.2782  |
| H  | 9.9405  | -1.0613  | -2.57   | N | -6.3541  | -1.7145 | 1.2051  | C  | 6.8725  | -18.9908 | -1.47    |
| H  | 7.3372  | -2.1285  | -8.5091 | C | -6.6221  | -0.8341 | 2.0962  | C  | 6.8239  | -17.6847 | -1.9556  |
| H  | 9.6222  | -2.2138  | -9.656  | C | -6.335   | 0.5246  | 1.7729  | N  | 8.697   | -15.9516 | 0.6104   |
| H  | 11.6606 | -1.9037  | -8.2911 | C | -6.6087  | 1.5187  | 2.7251  | C  | 9.3207  | -16.1496 | 1.7108   |
| Zn | 6.5113  | -1.6766  | -5.5107 | C | -7.157   | 1.1761  | 3.9638  | C  | 9.436   | -17.4871 | 2.3202   |
| C  | -4.8984 | -10.0712 | 0.3349  | C | -7.4357  | -0.155  | 4.2709  | C  | 8.8717  | -18.5228 | 1.7033   |
| C  | -4.8211 | -9.6107  | 1.5881  | C | -7.166   | -1.1592 | 3.3421  | H  | 7.8056  | -9.5228  | -2.3414  |
| C  | -4.7678 | -10.5751 | 2.6993  | N | -5.8267  | 0.8037  | 0.6131  | H  | 8.7641  | -11.1986 | -0.7072  |
| N  | -4.7875 | -11.8371 | 2.5019  | C | -5.5484  | 2.0077  | 0.2782  | H  | 6.044   | -12.9612 | -4.338   |
| C  | -4.8756 | -12.3241 | 1.3086  | C | -5.7841  | 3.1494  | 1.1806  | H  | 6.3495  | -15.236  | -3.4154  |
| C  | -4.9445 | -11.5428 | 0.2173  | C | -6.3053  | 2.9181  | 2.3831  | H  | 7.5707  | -20.3061 | 0.0976   |
| C  | -4.8713 | -13.8153 | 1.177   | H | -4.5475  | -4.836  | -3.5322 | H  | 6.3805  | -19.8047 | -2.0291  |
| N  | -4.7579 | -14.4866 | 2.259   | H | -4.737   | -2.3932 | -2.9768 | H  | 6.2919  | -17.478  | -2.8969  |
| C  | -4.695  | -15.7175 | 2.6093  | H | -6.2545  | -5.537  | 0.4113  | H  | 9.7881  | -15.2927 | 2.2205   |
| C  | -4.5475 | -15.9901 | 4.0012  | H | -6.7962  | -3.631  | 1.8883  | H  | 9.9809  | -17.6181 | 3.2689   |
| C  | -4.4706 | -17.326  | 4.425   | H | -7.3719  | 1.9619  | 4.7064  | H  | 8.9313  | -19.5409 | 2.1217   |
| C  | -4.5391 | -18.3656 | 3.4942  | H | -7.8697  | -0.4141 | 5.2515  | Zn | 8.3985  | -14.2885 | -0.4127  |
| C  | -4.6828 | -18.0902 | 2.1351  | H | -7.3898  | -2.2061 | 3.5981  | C  | -3.6593 | -9.2634  | -4.4756  |
| C  | -4.7589 | -16.7702 | 1.692   | H | -5.1199  | 2.1991  | -0.718  | C  | -3.1944 | -8.4253  | -5.4101  |
| N  | -4.4867 | -14.9993 | 4.8352  | H | -5.5326  | 4.1722  | 0.8569  | C  | -2.5255 | -8.9769  | -6.5996  |
| C  | -4.3538 | -15.1931 | 6.0938  | H | -6.5003  | 3.74    | 3.0912  | N  | -2.3669 | -10.2328 | -6.7636  |
| C  | -4.2607 | -16.5443 | 6.6764  | C | -0.9537  | -1.1931 | 0.5081  | C  | -2.8052 | -11.0785 | -5.8912  |
| C  | -4.317  | -17.5968 | 5.8639  | C | -1.7844  | -1.6571 | 1.4497  | C  | -3.4451 | -10.6943 | -4.7742  |
| H  | -4.7573 | -8.5376  | 1.82    | C | -3.2385  | -1.5482 | 1.2397  | C  | -2.5512 | -12.5292 | -6.1576  |
| H  | -4.6803 | -10.1945 | 3.7289  | N | -3.734   | -1.0269 | 0.1841  | N  | -1.9064 | -12.8109 | -7.2243  |
| H  | -5.0152 | -12.0145 | -0.7736 | C | -2.9706  | -0.5415 | -0.737  | C  | -1.4744 | -13.8594 | -7.8197  |
| H  | -4.9442 | -14.3034 | 0.1934  | C | -1.6308  | -0.568  | -0.6481 | C  | -0.7684 | -13.6665 | -9.043   |
| H  | -4.4789 | -19.4127 | 3.8339  | C | -3.6376  | 0.0298  | -1.9493 | C  | -0.2756 | -14.7907 | -9.7237  |
| H  | -4.7358 | -18.9191 | 1.4089  | N | -4.9133  | -0.038  | -1.9872 | C  | -0.4781 | -16.0731 | -9.2069  |
| H  | -4.8705 | -16.5677 | 0.616   | C | -5.8556  | 0.287   | -2.7917 | C  | -1.1718 | -16.2525 | -8.011   |
| H  | -4.3079 | -14.3223 | 6.7662  | C | -7.1876  | -0.0253 | -2.3905 | C  | -1.6676 | -15.1494 | -7.3171  |
| H  | -4.1468 | -16.6716 | 7.765   | C | -8.2478  | 0.3114  | -3.2467 | N  | -0.6004 | -12.4614 | -9.4914  |
| H  | -4.2507 | -18.6259 | 6.2536  | C | -7.9954  | 0.9412  | -4.4681 | C  | 0.0265  | -12.2378 | -10.5853 |
| C  | 0.0577  | -12.5389 | 3.9499  | C | -6.6893  | 1.24    | -4.8535 | C  | 0.5967  | -13.3249 | -11.402  |
| C  | -0.3886 | -13.3464 | 2.9815  | C | -5.6209  | 0.9127  | -4.0195 | C  | 0.4533  | -14.581  | -10.9856 |
| C  | -1.8283 | -13.649  | 2.9143  | N | -7.3823  | -0.6131 | -1.2511 | H  | -3.2597 | -7.3322  | -5.3164  |
| N  | -2.6625 | -13.1588 | 3.7487  | C | -8.56    | -0.9159 | -0.8497 | H  | -2.1296 | -8.2828  | -7.3572  |
| C  | -2.27   | -12.3934 | 4.7118  | C | -9.7642  | -0.6195 | -1.6473 | H  | -3.7894 | -11.466  | -4.0714  |
| C  | -0.981  | -12.0618 | 4.8854  | C | -9.6196  | -0.0164 | -2.8249 | H  | -2.8924 | -13.3083 | -5.4591  |
| C  | -3.3209 | -11.848  | 5.6271  | H | -1.4306  | -2.1614 | 2.3595  | H  | -0.0885 | -16.9519 | -9.7468  |
| N  | -4.5299 | -12.1676 | 5.3652  | H | -3.9176  | -1.9644 | 2.0001  | H  | -1.328  | -17.2694 | -7.6128  |
| C  | -5.6957 | -11.934  | 5.8419  | H | -1.0458  | -0.1478 | -1.4777 | H  | -2.2121 | -15.3058 | -6.3733  |
| C  | -6.8026 | -12.5293 | 5.169   | H | -3.0522  | 0.4643  | -2.774  | H  | 0.1454  | -11.1984 | -10.929  |
| C  | -8.0968 | -12.2951 | 5.6593  | H | -8.8331  | 1.2036  | -5.1352 | H  | 1.1298  | -13.0929 | -12.3379 |
| C  | -8.2898 | -11.4916 | 6.7861  | H | -6.5011  | 1.7346  | -5.8214 | H  | 0.863   | -15.4261 | -11.5631 |
| C  | -7.2013 | -10.9126 | 7.4369  | H | -4.5948  | 1.1522  | -4.3376 | C  | 2.7628  | -10.1376 | -6.2725  |
| C  | -5.907  | -11.1316 | 6.9669  | H | -8.6797  | -1.4135 | 0.1253  | C  | 2.1273  | -11.2119 | -5.7906  |
| N  | -6.5843 | -13.2673 | 4.1251  | H | -10.7614 | -0.8946 | -1.268  | C  | 0.8299  | -11.5948 | -6.3705  |

---

---

|    |          |          |         |    |          |          |         |    |         |          |          |
|----|----------|----------|---------|----|----------|----------|---------|----|---------|----------|----------|
| C  | -7.5463  | -13.8226 | 3.4881  | H  | -10.4907 | 0.2254   | -3.4557 | N  | 0.2885  | -10.9258 | -7.3136  |
| C  | -8.9549  | -13.6618 | 3.893   | Zn | -5.6245  | -0.8847  | -0.3913 | C  | 0.8644  | -9.8787  | -7.8051  |
| C  | -9.2336  | -12.9136 | 4.9577  | C  | 0.5353   | -1.3748  | 0.5707  | C  | 2.0563  | -9.44    | -7.3657  |
| H  | 0.2703   | -13.7556 | 2.2022  | C  | 1.3181   | -1.207   | -0.5785 | C  | 0.1393  | -9.1479  | -8.8915  |
| H  | -2.1994  | -14.2882 | 2.098   | C  | 2.6897   | -1.4767  | -0.5833 | N  | -0.9975 | -9.6175  | -9.2389  |
| H  | -0.7159  | -11.3964 | 5.7192  | C  | 3.2823   | -1.9202  | 0.6021  | C  | -1.9257 | -9.3304  | -10.074  |
| H  | -3.0609  | -11.1902 | 6.4702  | C  | 2.5442   | -2.1083  | 1.7757  | C  | -3.0632 | -10.1894 | -10.1007 |
| H  | -9.3091  | -11.3117 | 7.1656  | C  | 1.173    | -1.8216  | 1.7372  | C  | -4.1015 | -9.9092  | -11.0027 |
| H  | -7.365   | -10.2792 | 8.3252  | H  | 4.348    | -2.1804  | 0.5857  | C  | -4.0161 | -8.8053  | -11.855  |
| H  | -5.057   | -10.6681 | 7.4907  | H  | 0.5719   | -2.0022  | 2.6363  | C  | -2.9007 | -7.9698  | -11.8211 |
| H  | -7.3153  | -14.4425 | 2.6077  | H  | 0.8424   | -0.9002  | -1.5185 | C  | -1.8572 | -8.2305  | -10.9338 |
| H  | -9.7557  | -14.1558 | 3.3195  | C  | 3.0739   | -10.3177 | 4.6489  | N  | -3.1072 | -11.2037 | -9.2942  |
| H  | -10.2717 | -12.7655 | 5.2981  | C  | 4.0589   | -10.9999 | 3.9221  | C  | -4.1065 | -12.0044 | -9.2828  |
| Zn | -4.6353  | -13.32   | 3.8062  | C  | 3.7972   | -12.2119 | 3.2682  | C  | -5.2658 | -11.8293 | -10.1768 |
| C  | 3.1805   | -2.6961  | 3.0014  | C  | 2.5034   | -12.7406 | 3.3496  | C  | -5.2711 | -10.8033 | -11.0246 |
| C  | 4.3819   | -3.2871  | 2.9794  | C  | 1.4756   | -12.0653 | 4.0141  | H  | 2.5242  | -11.8129 | -4.9597  |
| C  | 4.8972   | -3.9138  | 4.2078  | C  | 1.7864   | -10.8677 | 4.6653  | H  | 0.3063  | -12.4756 | -5.9669  |
| N  | 4.2303   | -3.9172  | 5.2964  | H  | 2.2766   | -13.6903 | 2.8473  | H  | 2.5016  | -8.5474  | -7.8288  |
| C  | 3.0726   | -3.3493  | 5.3681  | H  | 0.9747   | -10.3202 | 5.1575  | H  | 0.5648  | -8.2462  | -9.3569  |
| C  | 2.5065   | -2.7334  | 4.3165  | H  | 5.0508   | -10.5452 | 3.8099  | H  | -4.8352 | -8.5906  | -12.5612 |
| C  | 2.3566   | -3.4213  | 6.6806  | C  | 4.0721   | -9.6657  | -5.7239 | H  | -2.8437 | -7.1006  | -12.498  |
| N  | 2.946    | -4.0552  | 7.621   | C  | 4.4678   | -8.3276  | -5.835  | H  | -0.9821 | -7.5629  | -10.9184 |
| C  | 2.7165   | -4.3656  | 8.8425  | C  | 5.6656   | -7.8631  | -5.2742 | H  | -4.1015 | -12.8546 | -8.5828  |
| C  | 3.7147   | -5.1282  | 9.5169  | C  | 6.4688   | -8.7774  | -4.5802 | H  | -6.1073 | -12.5396 | -10.1387 |
| C  | 3.4994   | -5.4899  | 10.8559 | C  | 6.0819   | -10.1092 | -4.4036 | H  | -6.1152 | -10.6332 | -11.713  |
| C  | 2.3256   | -5.1068  | 11.5099 | C  | 4.8922   | -10.5356 | -4.9997 | Zn | -1.4486 | -11.2087 | -8.2211  |

---

**Table S9.** Cartesian coordinates (in Å) for the PM7 model of **1** with  $C_2$  symmetry

|   |         |         |          |    |         |          |         |    |          |          |         |
|---|---------|---------|----------|----|---------|----------|---------|----|----------|----------|---------|
| C | 5.8393  | -5.3835 | -5.5077  | C  | 0.3377  | -2.8378  | 10.4502 | H  | -8.148   | -3.397   | 3.0749  |
| C | 6.5566  | -4.6539 | -4.6455  | C  | 0.526   | -2.5974  | 9.0897  | H  | -6.8001  | 0.6231   | -1.9462 |
| C | 6.5501  | -3.1876 | -4.7734  | N  | 3.9777  | -3.6142  | 8.7064  | H  | -7.6631  | 2.6912   | -0.7122 |
| N | 5.8762  | -2.5919 | -5.6799  | C  | 4.972   | -4.0758  | 9.3681  | H  | -8.5568  | 2.4338   | 1.5789  |
| C | 5.1949  | -3.2575 | -6.5517  | C  | 4.8901  | -4.3677  | 10.8109 | C  | -2.0348  | -1.5025  | -0.189  |
| C | 5.1408  | -4.5994 | -6.5476  | C  | 3.7422  | -4.1423  | 11.4456 | C  | -2.778   | -1.9753  | 0.8198  |
| C | 4.4179  | -2.4693 | -7.5597  | H  | 4.1173  | -2.2928  | 1.6908  | C  | -4.2087  | -2.2405  | 0.5969  |
| N | 4.4676  | -1.1965 | -7.4538  | H  | 5.0752  | -2.9618  | 3.9327  | N  | -4.7676  | -2.0319  | -0.5314 |
| C | 3.9732  | -0.1755 | -8.0488  | H  | 0.4427  | -1.4767  | 3.8669  | C  | -4.0992  | -1.5504  | -1.5252 |
| C | 4.3167  | 1.1075  | -7.5302  | H  | 0.3018  | -1.9153  | 6.2923  | C  | -2.79    | -1.2607  | -1.4377 |
| C | 3.7916  | 2.2512  | -8.1517  | H  | 1.2238  | -3.5273  | 12.2981 | C  | -4.8389  | -1.3482  | -2.811  |
| C | 2.9476  | 2.1272  | -9.2583  | H  | -0.6401 | -2.6286  | 10.9162 | N  | -6.0694  | -1.6944  | -2.8257 |
| C | 2.616   | 0.8685  | -9.758   | H  | -0.3076 | -2.1988  | 8.4916  | C  | -7.0386  | -1.7157  | -3.6632 |
| C | 3.1253  | -0.2809 | -9.155   | H  | 5.9222  | -4.2611  | 8.8432  | C  | -8.2837  | -2.2365  | -3.2026 |
| N | 5.1006  | 1.1827  | -6.5     | H  | 5.7676  | -4.764   | 11.3465 | C  | -9.3687  | -2.2808  | -4.092  |
| C | 5.4369  | 2.3115  | -5.9979  | H  | 3.6341  | -4.3449  | 12.5237 | C  | -9.2247  | -1.8203  | -5.4033 |
| C | 4.9596  | 3.5921  | -6.5508  | C  | 3.2512  | -7.7075  | 5.549   | C  | -8.0032  | -1.3141  | -5.8454 |
| C | 4.1517  | 3.5713  | -7.6083  | C  | 2.1531  | -7.041   | 5.9256  | C  | -6.9116  | -1.2627  | -4.9794 |
| H | 7.1095  | -5.0989 | -3.806   | C  | 2.2766  | -5.6325  | 6.3393  | N  | -8.3788  | -2.6563  | -1.9793 |
| H | 7.1082  | -2.5881 | -4.0374  | N  | 3.3991  | -5.0229  | 6.3444  | C  | -9.4749  | -3.1333  | -1.5207 |
| H | 4.5266  | -5.103  | -7.3071  | C  | 4.4845  | -5.6291  | 5.9944  | C  | -10.6932 | -3.238   | -2.3444 |
| H | 3.8164  | -2.9668 | -8.3356  | C  | 4.498   | -6.9165  | 5.6116  | C  | -10.6495 | -2.8214  | -3.6077 |
| H | 2.5384  | 3.0295  | -9.7421  | C  | 5.7506  | -4.831   | 6.0107  | H  | -2.3646  | -2.2136  | 1.8089  |
| H | 1.9482  | 0.7823  | -10.6317 | N  | 5.6518  | -3.606   | 6.3602  | H  | -4.8062  | -2.6587  | 1.422   |
| H | 2.8541  | -1.268  | -9.5595  | C  | 6.4271  | -2.5962  | 6.5028  | H  | -2.2845  | -0.8699  | -2.331  |
| H | 6.1067  | 2.3284  | -5.1241  | C  | 5.8297  | -1.3748  | 6.9315  | H  | -4.338   | -0.9376  | -3.7008 |
| H | 5.2717  | 4.5439  | -6.0916  | C  | 6.6454  | -0.2448  | 7.0989  | H  | -10.0813 | -1.8572  | -6.0963 |
| H | 3.7705  | 4.5037  | -8.0561  | C  | 8.0178  | -0.3225  | 6.8479  | H  | -7.9005  | -0.9537  | -6.883  |
| C | 2.4473  | -0.771  | -2.3978  | C  | 8.5934  | -1.521   | 6.4283  | H  | -5.953   | -0.8613  | -5.3422 |
| C | 1.9865  | -1.0704 | -3.6173  | C  | 7.8016  | -2.6556  | 6.2556  | H  | -9.5111  | -3.4765  | -0.4749 |
| C | 2.9097  | -1.0073 | -4.7629  | N  | 4.5529  | -1.3412  | 7.1546  | H  | -11.6185 | -3.6538  | -1.9144 |
| N | 4.1368  | -0.6795 | -4.6257  | C  | 3.9713  | -0.2682  | 7.5423  | H  | -11.5354 | -2.8796  | -4.2611 |
| C | 4.6154  | -0.3554 | -3.4707  | C  | 4.7061  | 0.9915   | 7.7583  | Zn | -6.6265  | -2.3998  | -1.1047 |
| C | 3.8653  | -0.358  | -2.3566  | C  | 6.0192  | 1.0117   | 7.5424  | C  | -0.5475  | -1.3116  | -0.0844 |
| C | 6.0704  | -0.0096 | -3.4049  | H  | 1.1514  | -7.4931  | 5.9165  | C  | 0.2258   | -1.0097  | -1.2132 |
| N | 6.7301  | -0.0949 | -4.4963  | H  | 1.3687  | -5.0838  | 6.6351  | C  | 1.6241   | -0.9477  | -1.1603 |
| C | 7.9373  | 0.0747  | -4.8902  | H  | 5.4587  | -7.3703  | 5.3312  | C  | 2.2507   | -1.171   | 0.0707  |
| C | 8.2118  | -0.1735 | -6.2671  | H  | 6.7139  | -5.2792  | 5.7235  | C  | 1.5209   | -1.4664  | 1.226   |
| C | 9.5235  | -0.0035 | -6.7367  | H  | 8.6529  | 0.5687   | 6.9818  | C  | 0.1274   | -1.534   | 1.123   |
| C | 10.5375 | 0.4011  | -5.8647  | H  | 9.678   | -1.5713  | 6.2331  | H  | 3.3473   | -1.1669  | 0.1189  |
| C | 10.2604 | 0.6399  | -4.5194  | H  | 8.2696  | -3.595   | 5.924   | H  | -0.4429  | -1.8279  | 2.0114  |
| C | 8.9645  | 0.4761  | -4.0315  | H  | 2.885   | -0.285   | 7.7218  | H  | -0.2695  | -0.8627  | -2.1806 |
| N | 7.2457  | -0.5513 | -7.0451  | H  | 4.1706  | 1.8946   | 8.0924  | C  | 3.2224   | -9.1261  | 5.0622  |
| C | 7.4432  | -0.7871 | -8.288   | H  | 6.6103  | 1.9303   | 7.6909  | C  | 4.2905   | -9.6477  | 4.3221  |
| C | 8.7706  | -0.6479 | -8.9143  | Zn | 3.8181  | -3.1393  | 6.7954  | C  | 4.2717   | -10.9505 | 3.8131  |
| C | 9.7972  | -0.263  | -8.1598  | C  | -3.0545 | -10.8422 | -3.821  | C  | 3.1404   | -11.7377 | 4.0479  |
| H | 0.9572  | -1.4153 | -3.7921  | C  | -2.1594 | -11.8322 | -3.7243 | C  | 2.0226   | -11.2369 | 4.7238  |
| H | 2.539   | -1.2921 | -5.7599  | C  | -1.4202 | -12.2472 | -4.9297 | C  | 2.0938   | -9.937   | 5.2399  |
| H | 4.3364  | -0.0858 | -1.4013  | N  | -1.6018 | -11.6865 | -6.0636 | H  | 3.118    | -12.7622 | 3.6538  |

|    |         |          |         |   |         |          |          |   |         |          |         |
|----|---------|----------|---------|---|---------|----------|----------|---|---------|----------|---------|
| H  | 6.5478  | 0.2787   | -2.4562 | C | -2.4627 | -10.7337 | -6.2014  | H | 1.2182  | -9.5255  | 5.7563  |
| H  | 11.5659 | 0.5319   | -6.2399 | C | -3.2062 | -10.2818 | -5.1792  | H | 5.1422  | -8.9996  | 4.0773  |
| H  | 11.0688 | 0.9574   | -3.8392 | C | -2.5943 | -10.1176 | -7.5585  | C | 4.2855  | -8.8607  | -5.702  |
| H  | 8.7602  | 0.6663   | -2.9667 | N | -1.8316 | -10.5797 | -8.4729  | C | 4.5719  | -7.5119  | -5.9454 |
| H  | 6.5937  | -1.1044  | -8.9125 | C | -1.6033 | -10.361  | -9.714   | C | 5.6584  | -6.8616  | -5.349  |
| H  | 8.9017  | -0.8594  | -9.9877 | C | -0.6095 | -11.1669 | -10.3424 | C | 6.4981  | -7.611   | -4.518  |
| H  | 10.8079 | -0.1449  | -8.584  | C | -0.3305 | -10.9574 | -11.7021 | C | 6.231   | -8.9512  | -4.2194 |
| Zn | 5.5933  | -0.6543  | -5.9675 | C | -1.017  | -9.9744  | -12.4198 | C | 5.1178  | -9.5547  | -4.8158 |
| C  | -4.4641 | -11.1873 | 0.9983  | C | -1.9865 | -9.1903  | -11.7963 | H | 7.367   | -7.1269  | -4.0527 |
| C  | -4.5296 | -10.5553 | 2.1754  | C | -2.2801 | -9.382   | -10.447  | H | 4.856   | -10.581  | -4.5269 |
| C  | -4.334  | -11.3299 | 3.4121  | N | 0.0067  | -12.0688 | -9.6431  | H | 3.8948  | -6.9313  | -6.583  |
| N  | -4.0994 | -12.5853 | 3.3933  | C | 0.9046  | -12.8178 | -10.1648 | C | -4.962  | -8.4134  | -1.5791 |
| C  | -4.0559 | -13.2394 | 2.2803  | C | 1.2971  | -12.7066 | -11.5817 | C | -4.3328 | -9.0017  | -2.6837 |
| C  | -4.2377 | -12.6443 | 1.0898  | C | 0.6962  | -11.7953 | -12.3431 | C | -3.7989 | -10.2946 | -2.6419 |
| C  | -3.7485 | -14.7023 | 2.3581  | H | -1.9281 | -12.3292 | -2.7712  | C | -3.8941 | -11.0051 | -1.441  |
| N  | -3.5196 | -15.1786 | 3.5219  | H | -0.6717 | -13.0504 | -4.8439  | C | -4.5043 | -10.4567 | -0.3073 |
| C  | -3.2097 | -16.3091 | 4.0385  | H | -3.922  | -9.4695  | -5.3687  | C | -5.0457 | -9.1691  | -0.403  |
| C  | -3.0253 | -16.3479 | 5.4518  | H | -3.305  | -9.2993  | -7.7499  | H | -3.4314 | -11.9979 | -1.3689 |
| C  | -2.6784 | -17.5667 | 6.0553  | H | -0.7928 | -9.8148  | -13.4874 | H | -5.5058 | -8.7272  | 0.4889  |
| C  | -2.5188 | -18.7175 | 5.279   | H | -2.5225 | -8.4168  | -12.372  | H | -4.1989 | -8.4154  | -3.5998 |
| C  | -2.7007 | -18.6702 | 3.8975  | H | -3.0481 | -8.7559  | -9.9674  | C | 5.3857  | -11.4459 | 2.9486  |
| C  | -3.0434 | -17.4695 | 3.2771  | H | 1.4017  | -13.5722 | -9.5353  | C | 5.2013  | -12.3903 | 2.02    |
| N  | -3.1788 | -15.2587 | 6.1385  | H | 2.0743  | -13.3693 | -11.995  | C | 6.3235  | -12.7508 | 1.1389  |
| C  | -3.0212 | -15.2432 | 7.4091  | H | 0.9565  | -11.6756 | -13.4076 | N | 7.4641  | -12.1838 | 1.2328  |
| C  | -2.6568 | -16.4511 | 8.1717  | C | 3.0659  | -9.5132  | -6.281   | C | 7.6903  | -11.2784 | 2.126   |
| C  | -2.4869 | -17.596  | 7.5147  | C | 2.0525  | -8.8193  | -6.8133  | C | 6.7477  | -10.8766 | 2.9952  |
| H  | -4.6686 | -9.4676  | 2.2565  | C | 0.8725  | -9.5443  | -7.3138  | C | 9.0539  | -10.6606 | 2.1419  |
| H  | -4.3477 | -10.8011 | 4.3779  | N | 0.7817  | -10.8165 | -7.2501  | N | 9.8779  | -11.0667 | 1.2529  |
| H  | -4.1727 | -13.2532 | 0.1767  | C | 1.7371  | -11.5263 | -6.7484  | C | 11.0844 | -10.8235 | 0.8972  |
| H  | -3.6979 | -15.3256 | 1.4525  | C | 2.8674  | -10.9776 | -6.2727  | C | 11.5925 | -11.554  | -0.2167 |
| H  | -2.2453 | -19.6715 | 5.7592  | C | 1.5335  | -13.0084 | -6.6969  | C | 12.9099 | -11.3152 | -0.6381 |
| H  | -2.5708 | -19.5844 | 3.2939  | N | 0.4223  | -13.4504 | -7.1474  | C | 13.7039 | -10.3772 | 0.0267  |
| H  | -3.1818 | -17.446  | 2.1854  | C | -0.1589 | -14.5833 | -7.289   | C | 13.1979 | -9.6657  | 1.1136  |
| H  | -3.1626 | -14.296  | 7.9528  | C | -1.4615 | -14.5764 | -7.8685  | C | 11.8916 | -9.8865  | 1.5485  |
| H  | -2.5296 | -16.3985 | 9.2649  | C | -2.1323 | -15.7973 | -8.0402  | N | 10.8259 | -12.416  | -0.8091 |
| H  | -2.2134 | -18.5244 | 8.0424  | C | -1.5282 | -16.9947 | -7.6487  | C | 11.2376 | -13.0965 | -1.8124 |
| C  | 0.7483  | -12.0212 | 4.7969  | C | -0.2541 | -16.9923 | -7.0828  | C | 12.5986 | -12.9474 | -2.3594 |
| C  | 0.4924  | -13.0463 | 3.9755  | C | 0.4299  | -15.7906 | -6.902   | C | 13.4258 | -12.0749 | -1.7887 |
| C  | -0.8434 | -13.6637 | 3.9975  | N | -1.9896 | -13.4458 | -8.2205  | H | 4.2298  | -12.8802 | 1.8598  |
| N  | -1.7665 | -13.247  | 4.7747  | C | -3.1557 | -13.3883 | -8.746   | H | 6.163   | -13.5104 | 0.3579  |
| C  | -1.5549 | -12.2812 | 5.6052  | C | -3.9721 | -14.5927 | -8.9832  | H | 6.9948  | -10.0964 | 3.7295  |
| C  | -0.3708 | -11.6526 | 5.689   | C | -3.477  | -15.7793 | -8.6393  | H | 9.3217  | -9.8841  | 2.8745  |
| C  | -2.7062 | -11.8485 | 6.4585  | H | 2.0488  | -7.722   | -6.8742  | H | 14.7383 | -10.1958 | -0.3085 |
| N  | -3.8174 | -12.4517 | 6.2704  | H | 0.036   | -8.9685  | -7.7399  | H | 13.8332 | -8.9272  | 1.631   |
| C  | -5.0109 | -12.4052 | 6.7333  | H | 3.6426  | -11.6408 | -5.8641  | H | 11.5056 | -9.3181  | 2.4085  |
| C  | -5.9612 | -13.3056 | 6.1686  | H | 2.3022  | -13.6777 | -6.2815  | H | 10.5534 | -13.8195 | -2.2831 |
| C  | -7.2809 | -13.283  | 6.6463  | H | -2.0604 | -17.9502 | -7.7877  | H | 12.9171 | -13.5517 | -3.2241 |
| C  | -7.6493 | -12.3927 | 7.6583  | H | 0.2136  | -17.9438 | -6.7779  | H | 14.4527 | -11.9298 | -2.1622 |
| C  | -6.7136 | -11.5148 | 8.2037  | H | 1.4351  | -15.8041 | -6.4537  | C | 7.0408  | -9.6891  | -3.2018 |
| C  | -5.3979 | -11.5182 | 7.7419  | H | -3.5645 | -12.4064 | -9.0314  | C | 7.7183  | -9.061   | -2.2348 |
| N  | -5.5823 | -14.1165 | 5.2303  | H | -4.9719 | -14.503  | -9.4378  | C | 8.3964  | -9.8637  | -1.2039 |

---

|    |         |          |         |    |         |          |         |    |         |          |         |
|----|---------|----------|---------|----|---------|----------|---------|----|---------|----------|---------|
| C  | -6.3995 | -14.9421 | 4.6918  | H  | -4.051  | -16.707  | -8.7979 | N  | 8.3518  | -11.14   | -1.2038 |
| C  | -7.8146 | -15.0262 | 5.0969  | Zn | -0.702  | -12.0081 | -7.7997 | C  | 7.7252  | -11.7868 | -2.1302 |
| C  | -8.2551 | -14.2156 | 6.0562  | C  | -5.4256 | -6.9845  | -1.6163 | C  | 7.0819  | -11.1638 | -3.1318 |
| H  | 1.221   | -13.4158 | 3.2401  | C  | -5.2129 | -6.1777  | -2.6638 | C  | 7.712   | -13.2803 | -2.0311 |
| H  | -1.0631 | -14.4799 | 3.2915  | C  | -5.5939 | -4.7589  | -2.5676 | N  | 8.3028  | -13.7931 | -1.0201 |
| H  | -0.2636 | -10.8251 | 6.4042  | N  | -6.1255 | -4.2708  | -1.5147 | C  | 8.5178  | -14.9612 | -0.54   |
| H  | -2.6012 | -11.0355 | 7.1928  | C  | -6.3777 | -5.0158  | -0.4913 | C  | 9.2479  | -15.0367 | 0.6823  |
| H  | -8.6871 | -12.3813 | 8.03    | C  | -6.0823 | -6.3259  | -0.4663 | C  | 9.4999  | -16.2987 | 1.2429  |
| H  | -7.0152 | -10.8158 | 9.0022  | C  | -6.9958 | -4.3536  | 0.7004  | C  | 9.0389  | -17.4559 | 0.6099  |
| H  | -4.6698 | -10.8191 | 8.181   | N  | -7.1995 | -3.0948  | 0.6153  | C  | 8.3244  | -17.3726 | -0.5843 |
| H  | -6.0341 | -15.6145 | 3.8999  | C  | -7.6675 | -2.1584  | 1.3536  | C  | 8.0634  | -16.1292 | -1.1587 |
| H  | -8.4875 | -15.7507 | 4.6108  | C  | -7.6729 | -0.8417  | 0.8065  | N  | 9.6564  | -13.9408 | 1.2422  |
| H  | -9.3045 | -14.2435 | 6.393   | C  | -8.1741 | 0.2124   | 1.5862  | C  | 10.3155 | -13.9576 | 2.3398  |
| Zn | -3.6614 | -13.807  | 4.8889  | C  | -8.6575 | -0.0315  | 2.8743  | C  | 10.6511 | -15.2124 | 3.0373  |
| C  | 2.2011  | -1.8112  | 2.5147  | C  | -8.6464 | -1.3219  | 3.402   | C  | 10.254  | -16.3662 | 2.5057  |
| C  | 3.4753  | -2.2142  | 2.5798  | C  | -8.1517 | -2.3835  | 2.6454  | H  | 7.7514  | -7.9649  | -2.1521 |
| C  | 4.0319  | -2.6129  | 3.8842  | N  | -7.2138 | -0.6538  | -0.3918 | H  | 8.929   | -9.3448  | -0.3918 |
| N  | 3.3334  | -2.5931  | 4.9538  | C  | -7.1971 | 0.51     | -0.9253 | H  | 6.557   | -11.7671 | -3.8865 |
| C  | 2.1028  | -2.2014  | 4.9362  | C  | -7.6932 | 1.7059   | -0.2201 | H  | 7.2002  | -13.8995 | -2.7833 |
| C  | 1.4921  | -1.7989  | 3.8105  | C  | -8.1747 | 1.5684   | 1.0131  | H  | 9.2388  | -18.4439 | 1.0566  |
| C  | 1.3538  | -2.2329  | 6.2313  | H  | -4.7296 | -6.5137  | -3.5911 | H  | 7.9643  | -18.2927 | -1.0751 |
| N  | 1.9929  | -2.6598  | 7.2516  | H  | -5.3862 | -4.0941  | -3.4206 | H  | 7.4971  | -16.0781 | -2.1012 |
| C  | 1.7637  | -2.8608  | 8.4957  | H  | -6.3098 | -6.8898  | 0.4482  | H  | 10.6438 | -13.0029 | 2.7793  |
| C  | 2.838   | -3.3767  | 9.2779  | H  | -7.244  | -4.9244  | 1.6082  | H  | 11.2198 | -15.1862 | 3.9807  |
| C  | 2.6265  | -3.6107  | 10.6457 | H  | -9.0502 | 0.8008   | 3.4813  | H  | 10.481  | -17.3291 | 2.9919  |
| C  | 1.383   | -3.3414  | 11.2232 | H  | -9.0295 | -1.5032  | 4.4205  | Zn | 9.0805  | -12.4238 | 0.1157  |

---

**Table S10.** Cartesian coordinates (in Å) for the PM7 model of **1** with  $C_3$  symmetry

|   |          |          |         |    |         |         |         |    |         |          |          |
|---|----------|----------|---------|----|---------|---------|---------|----|---------|----------|----------|
| C | -5.4141  | -7.9606  | -1.5247 | C  | -4.9872 | 2.7555  | 0.5633  | C  | 4.6172  | -19.1016 | 4.7931   |
| C | -5.5183  | -7.3007  | -0.365  | C  | -4.8788 | 1.5634  | -0.1516 | H  | 6.6437  | -11.2155 | -0.8987  |
| C | -6.0694  | -7.9993  | 0.8088  | N  | -2.2734 | 2.4346  | -2.5071 | H  | 6.79    | -12.6222 | 1.1982   |
| N | -6.4458  | -9.2189  | 0.7567  | C  | -1.5032 | 3.3995  | -2.8465 | H  | 4.5172  | -14.5908 | -2.6261  |
| C | -6.3746  | -9.8891  | -0.345  | C  | -1.5284 | 4.7052  | -2.1622 | H  | 4.036   | -16.5957 | -1.2676  |
| C | -5.9059  | -9.3534  | -1.484  | C  | -2.3824 | 4.8852  | -1.1573 | H  | 3.252   | -20.8934 | 3.2524   |
| C | -6.8141  | -11.3193 | -0.3063 | H  | -2.1537 | -4.0166 | -5.5473 | H  | 2.6599  | -20.6457 | 0.8485   |
| N | -7.2059  | -11.768  | 0.8242  | H  | -1.5351 | -1.5859 | -5.2815 | H  | 3.3185  | -18.601  | -0.4     |
| C | -7.6353  | -12.8744 | 1.3063  | H  | -4.9686 | -3.3185 | -2.3044 | H  | 6.1901  | -16.095  | 4.9537   |
| C | -7.9525  | -12.8967 | 2.696   | H  | -5.0995 | -1.1112 | -1.2177 | H  | 5.5925  | -18.1187 | 6.3998   |
| C | -8.4235  | -14.0913 | 3.2628  | H  | -4.2696 | 4.7802  | 0.8108  | H  | 4.3402  | -19.9918 | 5.3813   |
| C | -8.5773  | -15.2339 | 2.4733  | H  | -5.7161 | 2.8395  | 1.387   | Zn | 5.6282  | -15.4371 | 1.9319   |
| C | -8.2644  | -15.2029 | 1.1151  | H  | -5.5253 | 0.7133  | 0.1154  | C  | -3.0978 | -8.5717  | -5.9524  |
| C | -7.7934  | -14.0273 | 0.5318  | H  | -0.7979 | 3.2515  | -3.6791 | C  | -2.2248 | -8.16    | -6.8801  |
| N | -7.7967  | -11.8164 | 3.3964  | H  | -0.8505 | 5.5122  | -2.4834 | C  | -1.6258 | -9.1507  | -7.791   |
| C | -8.0678  | -11.7879 | 4.6474  | H  | -2.4375 | 5.8442  | -0.6166 | N  | -1.909  | -10.3943 | -7.7211  |
| C | -8.5701  | -12.9701 | 5.3712  | C  | 1.3975  | -0.9514 | -0.904  | C  | -2.7594 | -10.833  | -6.8543  |
| C | -8.7476  | -14.1048 | 4.6988  | C  | 0.2359  | -0.9599 | -0.2388 | C  | -3.3815 | -10.0221 | -5.9833  |
| H | -5.1772  | -6.2633  | -0.2394 | C  | -0.9767 | -0.4579 | -0.9071 | C  | -3.014  | -12.3078 | -6.8295  |
| H | -6.1322  | -7.4602  | 1.767   | N  | -0.9569 | -0.0187 | -2.1063 | N  | -2.3498 | -13.0183 | -7.6582  |
| H | -5.8733  | -9.9801  | -2.3862 | C  | 0.144   | 0.0227  | -2.7802 | C  | -2.2379 | -14.2562 | -7.9681  |
| H | -6.7827  | -11.9526 | -1.2058 | C  | 1.3156  | -0.3918 | -2.2698 | C  | -1.3123 | -14.5852 | -9.0012  |
| H | -8.9483  | -16.1688 | 2.9248  | C  | 0.0663  | 0.5307  | -4.1862 | C  | -1.1588 | -15.9311 | -9.3686  |
| H | -8.3895  | -16.1108 | 0.5011  | N  | -1.0918 | 0.8622  | -4.6134 | C  | -1.9043 | -16.9255 | -8.7301  |
| H | -7.5498  | -14.0174 | -0.5416 | C  | -1.6099 | 1.3104  | -5.6959 | C  | -2.8065 | -16.5948 | -7.72    |
| H | -7.9223  | -10.8487 | 5.2036  | C  | -3.0193 | 1.5255  | -5.7004 | C  | -2.973  | -15.2642 | -7.3377  |
| H | -8.7927  | -12.9067 | 6.4485  | C  | -3.6254 | 2.013   | -6.8688 | N  | -0.6384 | -13.635  | -9.5708  |
| H | -9.1215  | -15.0141 | 5.1975  | C  | -2.8554 | 2.2808  | -8.0036 | C  | 0.2049  | -13.8808 | -10.5023 |
| C | -2.633   | -10.9058 | 3.6967  | C  | -1.4778 | 2.0673  | -7.9904 | C  | 0.466   | -15.2485 | -10.9868 |
| C | -3.0472  | -11.7364 | 2.7324  | C  | -0.8553 | 1.5823  | -6.8408 | C  | -0.1999 | -16.2607 | -10.4359 |
| C | -4.4388  | -11.6468 | 2.2595  | N  | -3.7009 | 1.2643  | -4.6286 | H  | -1.9027 | -7.1134  | -6.9717  |
| N | -5.2618  | -10.7954 | 2.7376  | C  | -4.9682 | 1.4413  | -4.5843 | H  | -0.8882 | -8.811   | -8.5348  |
| C | -4.9113  | -9.9911  | 3.6855  | C  | -5.733  | 1.9483  | -5.7383 | H  | -4.0877 | -10.4683 | -5.2699  |
| C | -3.6751  | -9.9928  | 4.2101  | C  | -5.0813 | 2.2313  | -6.8637 | H  | -3.7263 | -12.7542 | -6.1192  |
| C | -5.9354  | -9.0111  | 4.1659  | H  | 0.1366  | -1.3603 | 0.7799  | H  | -1.7805 | -17.9806 | -9.025   |
| N | -7.0696  | -9.0336  | 3.578   | H  | -1.9344 | -0.4903 | -0.3645 | H  | -3.3899 | -17.3879 | -7.2225  |
| C | -8.1813  | -8.4006  | 3.6419  | H  | 2.2138  | -0.3301 | -2.8999 | H  | -3.6884 | -15.0176 | -6.5384  |
| C | -9.2026  | -8.7899  | 2.7269  | H  | 0.9623  | 0.5963  | -4.8217 | H  | 0.7544  | -13.0431 | -10.9595 |
| C | -10.4344 | -8.1178  | 2.7629  | H  | -3.3379 | 2.6636  | -8.918  | H  | 1.1991  | -15.4206 | -11.7912 |
| C | -10.649  | -7.0874  | 3.6819  | H  | -0.8795 | 2.2825  | -8.8918 | H  | -0.0389 | -17.2999 | -10.7664 |
| C | -9.6441  | -6.7131  | 4.5728  | H  | 0.233   | 1.4177  | -6.845  | C  | 2.6979  | -11.7505 | -5.9882  |
| C | -8.4123  | -7.3662  | 4.5532  | H  | -5.5073 | 1.2081  | -3.6528 | C  | 1.6641  | -12.4646 | -5.5293  |
| N | -8.9658  | -9.7501  | 1.8879  | H  | -6.8233 | 2.0879  | -5.662  | C  | 0.4535  | -12.5789 | -6.3608  |
| C | -9.8519  | -10.1343 | 1.0472  | H  | -5.6108 | 2.6129  | -7.7521 | N  | 0.36    | -12.0129 | -7.5027  |
| C | -11.1887 | -9.5166  | 0.9746  | Zn | -2.4487 | 0.6111  | -3.2475 | C  | 1.3439  | -11.3337 | -7.991   |
| C | -11.4827 | -8.5259  | 1.8133  | C  | 2.6655  | -1.5192 | -0.3371 | C  | 2.5034  | -11.175  | -7.3343  |
| H | -2.3776  | -12.4548 | 2.2387  | C  | 3.7309  | -1.867  | -1.1775 | C  | 1.1371  | -10.6857 | -9.3238  |
| H | -4.7666  | -12.3087 | 1.4427  | C  | 4.9029  | -2.4617 | -0.6926 | N  | -0.0112 | -10.8385 | -9.8619  |
| H | -3.4413  | -9.2714  | 5.0055  | C  | 4.9817  | -2.7155 | 0.6819  | C  | -0.6114 | -10.4706 | -10.9319 |

|    |          |          |         |   |         |          |         |    |         |          |          |
|----|----------|----------|---------|---|---------|----------|---------|----|---------|----------|----------|
| H  | -5.7101  | -8.2959  | 4.9715  | C | 3.9202  | -2.4423  | 1.5515  | C  | -1.9614 | -10.8974 | -11.0973 |
| H  | -11.619  | -6.5639  | 3.705   | C | 2.7802  | -1.8259  | 1.0241  | C  | -2.6548 | -10.5121 | -12.2553 |
| H  | -9.824   | -5.8982  | 5.2943  | H | 5.8834  | -3.1879  | 1.0881  | C  | -2.0269 | -9.725   | -13.2241 |
| H  | -7.6277  | -7.0599  | 5.2619  | H | 1.9321  | -1.6256  | 1.6897  | C  | -0.7061 | -9.3124  | -13.0538 |
| H  | -9.6095  | -10.9549 | 0.3541  | H | 3.6152  | -1.7218  | -2.2577 | C  | 0.001   | -9.6825  | -11.9105 |
| H  | -11.9251 | -9.8747  | 0.2373  | C | 0.6404  | -9.5281  | 5.09    | N  | -2.5107 | -11.626  | -10.1757 |
| H  | -12.4691 | -8.034   | 1.7961  | C | 1.52    | -10.5426 | 4.6942  | C  | -3.7203 | -12.0327 | -10.2796 |
| Zn | -7.1249  | -10.3974 | 2.1972  | C | 1.0795  | -11.7148 | 4.0682  | C  | -4.5643 | -11.7031 | -11.4427 |
| C  | 3.9568   | -2.8915  | 2.9807  | C | -0.292  | -11.8465 | 3.8208  | C  | -4.0488 | -10.9571 | -12.4169 |
| C  | 4.8141   | -3.8211  | 3.4192  | C | -1.2019 | -10.8303 | 4.1362  | H  | 1.6635  | -12.9313 | -4.5337  |
| C  | 4.7003   | -4.3028  | 4.8053  | C | -0.7169 | -9.69    | 4.7882  | H  | -0.4091 | -13.1401 | -5.969   |
| N  | 3.803    | -3.8649  | 5.6007  | H | -0.6612 | -12.7524 | 3.3245  | H  | 3.2981  | -10.5776 | -7.8034  |
| C  | 2.9676   | -2.9538  | 5.2268  | H | -1.4145 | -8.877   | 5.0219  | H  | 1.9315  | -10.0927 | -9.802   |
| C  | 2.9851   | -2.4258  | 3.9919  | H | 2.5966  | -10.3864 | 4.8266  | H  | -2.5774 | -9.4258  | -14.1312 |
| C  | 1.9382   | -2.5197  | 6.2229  | C | 3.9175  | -11.4695 | -5.169  | H  | -0.2198 | -8.6916  | -13.8251 |
| N  | 1.9578   | -3.1046  | 7.359   | C | 4.6876  | -10.3328 | -5.4302 | H  | 1.043   | -9.3492  | -11.7887 |
| C  | 1.2945   | -3.069   | 8.4542  | C | 5.7608  | -9.9578  | -4.6152 | H  | -4.1462 | -12.6509 | -9.474   |
| C  | 1.7012   | -3.9622  | 9.4884  | C | 6.0735  | -10.7731 | -3.5206 | H  | -5.6011 | -12.0719 | -11.4968 |
| C  | 0.9985   | -3.9553  | 10.7033 | C | 5.331   | -11.924  | -3.224  | H  | -4.6416 | -10.6857 | -13.3058 |
| C  | -0.0794  | -3.0858  | 10.8892 | C | 4.257   | -12.252  | -4.0613 | Zn | -1.1767 | -11.9213 | -8.7489  |
| C  | -0.4706  | -2.2162  | 9.8721  | H | 6.8872  | -10.4708 | -2.8479 | C  | 6.4774  | -8.6642  | -4.8479  |
| C  | 0.2128   | -2.2073  | 8.6567  | H | 3.6293  | -13.1174 | -3.8127 | C  | 5.9254  | -7.6609  | -5.5398  |
| N  | 2.7057   | -4.7548  | 9.2787  | H | 4.4036  | -9.6852  | -6.2691 | C  | 6.6494  | -6.3852  | -5.6505  |
| C  | 3.1088   | -5.5737  | 10.1766 | C | -3.9447 | -5.4129  | -3.9673 | N  | 7.7861  | -6.2052  | -5.0987  |
| C  | 2.4633   | -5.6722  | 11.4984 | C | -3.5282 | -6.2666  | -4.9965 | C  | 8.3628  | -7.1486  | -4.4308  |
| C  | 1.4265   | -4.8814  | 11.7648 | C | -3.681  | -7.6568  | -4.9148 | C  | 7.8056  | -8.3622  | -4.2747  |
| H  | 5.5775   | -4.2793  | 2.7748  | C | -4.3089 | -8.1787  | -3.777  | C  | 9.683   | -6.8273  | -3.8017  |
| H  | 5.3893   | -5.0881  | 5.1533  | C | -4.7989 | -7.3605  | -2.753  | N  | 10.1198 | -5.6359  | -3.9605  |
| H  | 2.2374   | -1.6621  | 3.7362  | C | -4.5968 | -5.9811  | -2.8666 | C  | 11.1399 | -4.9456  | -3.6083  |
| H  | 1.1936   | -1.7473  | 5.9772  | H | -4.3686 | -9.2664  | -3.6523 | C  | 11.1831 | -3.5858  | -4.0359  |
| H  | -0.6267  | -3.0848  | 11.8461 | H | -4.9161 | -5.3316  | -2.0432 | C  | 12.2835 | -2.7958  | -3.668   |
| H  | -1.3228  | -1.5336  | 10.0295 | H | -3.0289 | -5.8355  | -5.8728 | C  | 13.3144 | -3.3383  | -2.8965  |
| H  | -0.1071  | -1.5156  | 7.8624  | C | 2.0644  | -12.7361 | 3.5796  | C  | 13.263  | -4.6683  | -2.4815  |
| H  | 3.9677   | -6.2267  | 9.9564  | C | 1.7431  | -13.6953 | 2.7029  | C  | 12.179  | -5.4709  | -2.835   |
| H  | 2.8392   | -6.3891  | 12.2459 | C | 2.8021  | -14.5804 | 2.1889  | N  | 10.2071 | -3.1169  | -4.7495  |
| H  | 0.9128   | -4.9194  | 12.7394 | N | 4.0211  | -14.4588 | 2.5501  | C  | 10.2009 | -1.903   | -5.1565  |
| C  | 1.1639   | -8.2642  | 5.7074  | C | 4.3725  | -13.5625 | 3.4103  | C  | 11.2925 | -0.9626  | -4.8438  |
| C  | 0.4474   | -7.1364  | 5.7903  | C | 3.4925  | -12.7105 | 3.9606  | C  | 12.3187 | -1.3931  | -4.1138  |
| C  | 1.0769   | -5.9265  | 6.3481  | C | 5.8258  | -13.4793 | 3.7585  | H  | 4.9294  | -7.7318  | -5.9998  |
| N  | 2.2891   | -5.9161  | 6.7514  | N | 6.6072  | -14.2905 | 3.1552  | H  | 6.1806  | -5.5545  | -6.2004  |
| C  | 3.0119   | -6.985   | 6.7022  | C | 7.86    | -14.5562 | 3.1284  | H  | 8.3418  | -9.1236  | -3.6902  |
| C  | 2.5419   | -8.1506  | 6.2296  | C | 8.2854  | -15.5885 | 2.2421  | H  | 10.2363 | -7.5787  | -3.2182  |
| C  | 4.428    | -6.8779  | 7.1742  | C | 9.6507  | -15.909  | 2.183   | H  | 14.1759 | -2.7124  | -2.6111  |
| N  | 4.8138   | -5.7269  | 7.5721  | C | 10.5707 | -15.2252 | 2.982   | H  | 14.0816 | -5.0861  | -1.8714  |
| C  | 5.8862   | -5.1923  | 8.0244  | C | 10.1458 | -14.2158 | 3.8448  | H  | 12.1512 | -6.519   | -2.4996  |
| C  | 5.8357   | -3.8026  | 8.3382  | C | 8.7945  | -13.8799 | 3.9179  | H  | 9.3522  | -1.5479  | -5.7617  |
| C  | 6.9918   | -3.1792  | 8.8331  | N | 7.4022  | -16.2008 | 1.5164  | H  | 11.2521 | 0.0751   | -5.2119  |
| C  | 8.1674   | -3.9131  | 9.0118  | C | 7.7359  | -17.1344 | 0.7062  | H  | 13.1576 | -0.7264  | -3.8552  |
| C  | 8.2076   | -5.2717  | 8.7014  | C | 9.134   | -17.5731 | 0.5435  | C  | 5.986   | -2.9193  | -1.6277  |
| C  | 7.0708   | -5.9111  | 8.2087  | C | 10.0801 | -16.977  | 1.2652  | C  | 7.0069  | -3.6917  | -1.2339  |
| N  | 4.7271   | -3.1544  | 8.1569  | H | 0.7243  | -13.8296 | 2.3136  | C  | 7.9546  | -4.1993  | -2.2397  |



---

|    |         |         |         |   |         |          |         |    |         |         |          |
|----|---------|---------|---------|---|---------|----------|---------|----|---------|---------|----------|
| C  | 4.6337  | -1.9057 | 8.4239  | H | 2.538   | -15.3485 | 1.4452  | N  | 7.834   | -3.9262 | -3.4808  |
| C  | 5.7693  | -1.1261 | 8.9498  | H | 3.8661  | -11.9679 | 4.6787  | C  | 6.8827  | -3.1626 | -3.9035  |
| C  | 6.9305  | -1.7438 | 9.1535  | H | 6.1993  | -12.7424 | 4.4856  | C  | 5.9661  | -2.6311 | -3.0777  |
| H  | -0.5884 | -7.0629 | 5.4304  | H | 11.6414 | -15.4832 | 2.9322  | C  | 6.8123  | -2.91   | -5.3772  |
| H  | 0.4903  | -4.9956 | 6.3945  | H | 10.8807 | -13.6823 | 4.4712  | N  | 7.6877  | -3.4951 | -6.1014  |
| H  | 3.215   | -9.0189 | 6.2195  | H | 8.4731  | -13.0812 | 4.6037  | C  | 7.9838  | -3.5815 | -7.3447  |
| H  | 5.1034  | -7.7468 | 7.1612  | H | 6.9527  | -17.6298 | 0.1113  | C  | 9.0891  | -4.4123 | -7.692   |
| H  | 9.0722  | -3.417  | 9.3999  | H | 9.3821  | -18.3814 | -0.163  | C  | 9.443   | -4.536  | -9.0447  |
| H  | 9.1414  | -5.8413 | 8.845   | H | 11.1385 | -17.2728 | 1.1787  | C  | 8.7193  | -3.8564 | -10.028  |
| H  | 7.117   | -6.984  | 7.9671  | C | 5.5798  | -12.7233 | -1.9823 | C  | 7.6381  | -3.0482 | -9.6792  |
| H  | 3.673   | -1.3946 | 8.2557  | C | 6.2174  | -12.229  | -0.9152 | C  | 7.2695  | -2.9108 | -8.3416  |
| H  | 5.6506  | -0.0524 | 9.1672  | C | 6.2958  | -13.0447 | 0.3094  | N  | 9.7338  | -5.0309 | -6.752   |
| H  | 7.8071  | -1.2019 | 9.5447  | N | 5.7702  | -14.207  | 0.3849  | C  | 10.7333 | -5.7867 | -7.0147  |
| Zn | 3.3828  | -4.42   | 7.4537  | C | 5.1688  | -14.731  | -0.631  | C  | 11.2146 | -6.0051 | -8.3911  |
| C  | -3.6141 | -3.95   | -3.9808 | C | 5.0505  | -14.091  | -1.8052 | C  | 10.5864 | -5.3951 | -9.3935  |
| C  | -2.6901 | -3.4233 | -4.7934 | C | 4.5619  | -16.0862 | -0.4458 | H  | 7.1544  | -4.0041 | -0.1912  |
| C  | -2.3209 | -2.0063 | -4.6345 | N | 4.6642  | -16.6051 | 0.7171  | H  | 8.7721  | -4.861  | -1.9133  |
| N  | -2.8521 | -1.2643 | -3.7408 | C | 4.2999  | -17.6812 | 1.3086  | H  | 5.1755  | -2.0053 | -3.513   |
| C  | -3.7667 | -1.7241 | -2.9538 | C | 4.6448  | -17.8129 | 2.6856  | H  | 6.0309  | -2.2683 | -5.8117  |
| C  | -4.1979 | -2.9938 | -3.0169 | C | 4.259   | -18.9757 | 3.3707  | H  | 9.0018  | -3.9589 | -11.0887 |
| C  | -4.3168 | -0.7903 | -1.9218 | C | 3.5516  | -19.9825 | 2.7085  | H  | 7.0726  | -2.5173 | -10.4636 |
| N  | -3.8151 | 0.384   | -1.887  | C | 3.2188  | -19.8449 | 1.3617  | H  | 6.4126  | -2.271  | -8.0808  |
| C  | -3.9582 | 1.4541  | -1.1977 | C | 3.5895  | -18.697  | 0.6626  | H  | 11.2532 | -6.2911 | -6.1853  |
| C  | -3.1234 | 2.5591  | -1.5354 | N | 5.3011  | -16.8568 | 3.2662  | H  | 12.079  | -6.6623 | -8.5778  |
| C  | -3.2484 | 3.7492  | -0.8016 | C | 5.6316  | -16.9292 | 4.5011  | H  | 10.9104 | -5.5283 | -10.4387 |
| C  | -4.1761 | 3.8421  | 0.2392  | C | 5.2909  | -18.0926 | 5.3403  | Zn | 8.8955  | -4.5679 | -5.0241  |

---

**Table S11.** Cartesian coordinates (in Å) for the PM7 model of **1** with  $S_4$  symmetry

|    |         |         |         |   |         |         |         |   |         |         |         |
|----|---------|---------|---------|---|---------|---------|---------|---|---------|---------|---------|
| Zn | 13.0405 | 31.5482 | -0.3011 | H | 21.345  | 31.4416 | 10.7153 | H | 8.3467  | 21.411  | 9.4867  |
| Zn | 19.3702 | 21.0018 | 1.2505  | C | 27.2558 | 32.3177 | -3.3551 | C | 10.2739 | 22.167  | 10.1265 |
| Zn | 27.1631 | 31.5481 | -0.3982 | C | 27.1288 | 33.1903 | -4.3622 | H | 10.8325 | 21.3775 | 9.5976  |
| Zn | 20.5862 | 34.4751 | 9.9188  | H | 27.2196 | 32.8594 | -5.4106 | C | 10.9503 | 23.142  | 10.8602 |
| N  | 11.0452 | 31.575  | -0.2905 | C | 26.8673 | 34.607  | -4.0512 | C | 10.2166 | 24.1267 | 11.5398 |
| N  | 12.7838 | 29.7486 | -1.0976 | H | 26.7597 | 35.344  | -4.8634 | C | 13.4082 | 22.6578 | 10.3762 |
| N  | 15.0007 | 31.1465 | -0.436  | C | 26.7562 | 35.005  | -2.6709 | H | 13.258  | 21.902  | 9.5893  |
| N  | 18.5253 | 19.2154 | 1.5314  | C | 26.5096 | 36.3235 | -2.2853 | C | 14.7362 | 23.2048 | 10.7216 |
| N  | 17.5497 | 21.5136 | 0.6514  | H | 26.3919 | 37.1106 | -3.0479 | C | 15.9725 | 22.8209 | 10.0208 |
| N  | 19.8519 | 22.9056 | 0.8712  | C | 26.4134 | 36.651  | -0.9318 | H | 15.9156 | 22.0455 | 9.2412  |
| N  | 29.1555 | 31.5357 | -0.3692 | H | 26.2225 | 37.6952 | -0.6326 | C | 17.129  | 23.4409 | 10.3072 |
| N  | 27.4416 | 29.8575 | -1.3914 | C | 26.5603 | 35.6647 | 0.0445  | C | 17.1056 | 24.4743 | 11.3682 |
| N  | 25.2065 | 31.176  | -0.6069 | H | 26.4876 | 35.9389 | 1.1097  | H | 18.0288 | 25.018  | 11.6276 |
| C  | 10.1824 | 32.5516 | 0.1496  | C | 26.8009 | 34.3426 | -0.3313 | C | 15.9608 | 24.7768 | 11.9999 |
| C  | 8.7234  | 32.3364 | 0.1559  | C | 26.9045 | 34.0196 | -1.6925 | H | 15.9589 | 25.5453 | 12.7891 |
| H  | 8.0452  | 33.1323 | 0.5074  | C | 26.7062 | 33.0803 | 1.8745  | C | 20.7821 | 22.9285 | 9.3236  |
| C  | 8.2376  | 31.1656 | -0.2711 | H | 26.4188 | 33.9281 | 2.5161  | C | 20.6149 | 22.6602 | 7.9604  |
| H  | 7.1496  | 30.9888 | -0.2738 | C | 26.7387 | 31.6851 | 2.356   | H | 21.5091 | 22.5359 | 7.3347  |
| C  | 9.1616  | 30.107  | -0.7374 | C | 26.3565 | 31.3031 | 3.7241  | C | 19.3569 | 22.5699 | 7.3643  |
| C  | 8.6998  | 28.8692 | -1.1887 | H | 26.0987 | 32.1034 | 4.4342  | C | 18.2432 | 22.8284 | 8.1643  |
| H  | 7.6185  | 28.6564 | -1.2065 | C | 26.298  | 30.0078 | 4.0743  | H | 17.2423 | 22.7931 | 7.7122  |
| C  | 9.6028  | 27.8966 | -1.6215 | C | 26.6687 | 29.0096 | 3.0437  | C | 18.3644 | 23.1478 | 9.5234  |
| H  | 9.2294  | 26.9228 | -1.9805 | H | 26.6278 | 27.9335 | 3.278   | C | 19.6442 | 23.1932 | 10.0957 |
| C  | 10.9746 | 28.1504 | -1.6044 | C | 27.0382 | 29.4033 | 1.814   | H | 19.7545 | 23.4123 | 11.169  |
| H  | 11.6758 | 27.3751 | -1.9539 | H | 27.3181 | 28.6491 | 1.0616  | N | 21.9313 | 35.19   | 11.2094 |
| C  | 11.4487 | 29.3814 | -1.1502 | C | 26.7414 | 20.5633 | 12.6701 | N | 19.8665 | 33.5586 | 11.5249 |
| C  | 10.5364 | 30.3589 | -0.7245 | C | 26.6305 | 19.8837 | 13.9742 | N | 19.1206 | 33.5383 | 8.9299  |
| C  | 13.9788 | 29.082  | -1.1774 | H | 26.5769 | 18.7831 | 14.0252 | N | 12.9069 | 23.7548 | 13.8282 |
| H  | 13.9921 | 28.0198 | -1.4689 | C | 26.5981 | 20.6208 | 15.0899 | N | 13.3734 | 26.3005 | 13.2723 |
| C  | 15.197  | 29.8284 | -0.7967 | H | 26.5167 | 20.1286 | 16.0728 | N | 13.0091 | 26.0788 | 10.5964 |
| C  | 16.4053 | 29.2562 | -0.756  | C | 26.6719 | 22.0969 | 15.004  | N | 13.0847 | 32.4954 | -2.0563 |
| H  | 16.4971 | 28.2034 | -1.0646 | C | 26.6451 | 22.9055 | 16.1417 | N | 13.2283 | 33.3808 | 0.4387  |
| C  | 17.601  | 29.9948 | -0.2874 | H | 26.5673 | 22.449  | 17.1418 | N | 13.0758 | 30.9528 | 1.6112  |
| C  | 17.4346 | 31.2789 | 0.0681  | C | 26.7217 | 24.294  | 16.0199 | C | 22.9881 | 36.0429 | 10.9708 |
| H  | 18.2784 | 31.8852 | 0.4348  | H | 26.7067 | 24.9256 | 16.9239 | C | 23.9049 | 36.3264 | 11.9039 |
| C  | 16.0873 | 31.8787 | -0.013  | C | 26.8212 | 24.887  | 14.7609 | H | 24.7392 | 37.0141 | 11.6848 |
| H  | 15.9303 | 32.9311 | 0.2701  | H | 26.889  | 25.9843 | 14.68   | C | 23.7832 | 35.7074 | 13.2359 |
| C  | 19.0805 | 18.0415 | 1.9853  | C | 26.8401 | 24.09   | 13.616  | H | 24.5262 | 35.9252 | 14.0201 |
| C  | 18.2716 | 16.8164 | 2.1236  | C | 26.774  | 22.6944 | 13.7445 | C | 22.6792 | 34.8166 | 13.489  |
| H  | 18.7332 | 15.8836 | 2.4892  | C | 26.7696 | 25.7858 | 11.7208 | C | 22.488  | 34.1847 | 14.7186 |
| C  | 16.9748 | 16.8547 | 1.7985  | H | 26.6199 | 26.6826 | 12.3429 | H | 23.1946 | 34.359  | 15.5463 |
| H  | 16.3562 | 15.9475 | 1.8952  | C | 26.7003 | 25.8089 | 10.2442 | C | 21.4023 | 33.3269 | 14.904  |
| C  | 16.3718 | 18.1141 | 1.3064  | C | 26.416  | 26.921  | 9.5576  | H | 21.2568 | 32.8293 | 15.8775 |
| C  | 15.0243 | 18.199  | 0.9516  | H | 26.2772 | 27.8629 | 10.1112 | C | 20.5026 | 33.0923 | 13.8632 |
| H  | 14.375  | 17.3123 | 1.0344  | C | 26.2478 | 26.8998 | 8.0867  | H | 19.6522 | 32.4094 | 14.0227 |
| C  | 14.4928 | 19.4042 | 0.4894  | C | 26.4281 | 25.7282 | 7.4564  | C | 20.6855 | 33.7192 | 12.6302 |
| H  | 13.4274 | 19.4623 | 0.2105  | H | 26.3047 | 25.6425 | 6.3647  | C | 21.7742 | 34.5859 | 12.4509 |
| C  | 15.3023 | 20.5351 | 0.3765  | C | 26.7626 | 24.5291 | 8.2505  | C | 18.8115 | 32.7478 | 11.1933 |
| H  | 14.8701 | 21.4798 | 0.0083  | H | 26.9143 | 23.5575 | 7.7553  | H | 18.3275 | 32.1373 | 11.9721 |

|   |         |         |         |    |         |         |         |   |         |         |         |
|---|---------|---------|---------|----|---------|---------|---------|---|---------|---------|---------|
| C | 16.6504 | 20.4628 | 0.7277  | C  | 24.4744 | 30.1775 | 7.4023  | C | 18.4038 | 32.7139 | 9.7724  |
| C | 17.1797 | 19.2492 | 1.1931  | C  | 24.9105 | 30.4379 | 6.1014  | C | 17.4207 | 31.9266 | 9.3206  |
| C | 17.5063 | 22.8355 | 0.2886  | H  | 24.5047 | 31.3075 | 5.5685  | H | 16.8596 | 31.3324 | 10.0564 |
| H | 16.5543 | 23.2784 | -0.0446 | C  | 25.8331 | 29.6188 | 5.4398  | C | 17.1013 | 31.8304 | 7.8752  |
| C | 18.7542 | 23.6163 | 0.4304  | C  | 26.2707 | 28.4542 | 6.0824  | C | 17.8494 | 32.5676 | 7.035   |
| C | 18.8212 | 24.9284 | 0.1756  | H  | 26.9959 | 27.7945 | 5.582   | H | 17.7104 | 32.5305 | 5.9438  |
| H | 17.922  | 25.4274 | -0.2153 | C  | 25.822  | 28.1363 | 7.371   | C | 18.9026 | 33.4458 | 7.5773  |
| C | 20.0567 | 25.7072 | 0.4322  | C  | 24.9391 | 29.0118 | 8.0144  | H | 19.5241 | 34.0522 | 6.9004  |
| C | 21.1112 | 25.0398 | 0.9328  | H  | 24.5956 | 28.7611 | 9.0272  | C | 12.6578 | 22.423  | 14.0658 |
| H | 22.0533 | 25.5489 | 1.1885  | Zn | 26.8562 | 23.111  | 10.973  | C | 12.8419 | 21.838  | 15.4069 |
| C | 21.006  | 23.588  | 1.1691  | Zn | 12.8872 | 24.767  | 12.1084 | H | 12.6326 | 20.769  | 15.5809 |
| H | 21.8579 | 23.0275 | 1.5843  | N  | 28.8368 | 22.9017 | 10.8236 | C | 13.2629 | 22.6222 | 16.4052 |
| C | 29.9936 | 32.4834 | 0.1705  | N  | 26.8379 | 21.6037 | 9.6809  | H | 13.4047 | 22.201  | 17.414  |
| C | 31.3163 | 32.3167 | 0.1306  | N  | 24.8543 | 23.0461 | 10.8341 | C | 13.5385 | 24.0551 | 16.1548 |
| H | 32.0012 | 33.0685 | 0.5583  | N  | 19.999  | 20.4361 | -0.5573 | C | 13.9813 | 24.9101 | 17.1656 |
| C | 31.8399 | 31.094  | -0.5051 | N  | 21.1848 | 20.4274 | 1.8091  | H | 14.1351 | 24.5247 | 18.1867 |
| H | 32.9315 | 30.9443 | -0.5455 | N  | 19.1058 | 21.4769 | 3.1752  | C | 14.2291 | 26.256  | 16.8901 |
| C | 30.9997 | 30.1829 | -1.0255 | N  | 10.9219 | 25.0708 | 12.2722 | H | 14.5749 | 26.9258 | 17.6953 |
| C | 31.4838 | 29.0766 | -1.618  | N  | 12.3263 | 23.2084 | 11.0137 | C | 14.0397 | 26.7588 | 15.6025 |
| H | 32.5716 | 28.9014 | -1.6687 | N  | 14.758  | 24.1741 | 11.7007 | H | 14.2342 | 27.8248 | 15.4005 |
| C | 30.6605 | 28.1735 | -2.1614 | C  | 29.844  | 23.612  | 11.4348 | C | 13.6037 | 25.9128 | 14.5824 |
| H | 31.0567 | 27.2698 | -2.6543 | C  | 31.2615 | 23.3625 | 11.1125 | C | 13.3478 | 24.5628 | 14.8666 |
| C | 29.2098 | 28.4108 | -2.0946 | H  | 32.0562 | 23.9379 | 11.6167 | C | 13.7181 | 27.387  | 12.5116 |
| H | 28.5122 | 27.6856 | -2.5447 | C  | 31.5673 | 22.4303 | 10.2034 | H | 14.16   | 28.276  | 12.9884 |
| C | 28.7757 | 29.5205 | -1.4856 | H  | 32.6218 | 22.2307 | 9.9517  | C | 13.5493 | 27.2617 | 11.0502 |
| C | 29.6658 | 30.3939 | -0.9616 | C  | 30.489  | 21.6693 | 9.5337  | C | 13.9883 | 28.298  | 10.103  |
| C | 26.2505 | 29.1888 | -1.5232 | C  | 30.7603 | 20.6909 | 8.5752  | H | 14.401  | 29.2334 | 10.5103 |
| H | 26.2393 | 28.1466 | -1.8793 | H  | 31.8025 | 20.4638 | 8.2973  | C | 13.9103 | 28.0827 | 8.7795  |
| C | 25.0325 | 29.8879 | -1.064  | C  | 29.7157 | 19.9943 | 7.9651  | C | 13.3349 | 26.7912 | 8.3354  |
| C | 23.7094 | 29.2451 | -1.0039 | H  | 29.9383 | 19.2205 | 7.2113  | H | 13.2578 | 26.5623 | 7.26    |
| H | 23.6075 | 28.214  | -1.3759 | C  | 28.3913 | 20.2709 | 8.3053  | C | 12.9212 | 25.8832 | 9.2343  |
| C | 22.6682 | 29.9007 | -0.4663 | H  | 27.5761 | 19.7105 | 7.8193  | H | 12.489  | 24.9309 | 8.8883  |
| C | 22.9037 | 31.2817 | 0.0158  | C  | 28.1082 | 21.2501 | 9.258   | C | 13.0114 | 31.9857 | -3.3318 |
| H | 22.0816 | 31.8523 | 0.478   | C  | 29.1611 | 21.9419 | 9.8742  | C | 13.1803 | 32.8532 | -4.5123 |
| C | 24.1202 | 31.8391 | -0.0796 | C  | 25.5673 | 21.3743 | 9.2253  | H | 13.1133 | 32.4292 | -5.5285 |
| H | 24.2802 | 32.8682 | 0.2788  | H  | 25.3958 | 20.6638 | 8.4016  | C | 13.4132 | 34.1578 | -4.3311 |
| C | 18.9131 | 29.2892 | -0.1947 | C  | 24.4864 | 22.175  | 9.8322  | H | 13.5406 | 34.8205 | -5.2027 |
| C | 18.9199 | 27.9228 | 0.104   | C  | 23.0945 | 22.1135 | 9.3633  | C | 13.5013 | 34.7106 | -2.9604 |
| H | 17.9642 | 27.428  | 0.324   | H  | 22.8442 | 21.3963 | 8.5663  | C | 13.7444 | 36.0648 | -2.7243 |
| C | 20.0988 | 27.1767 | 0.159   | C  | 22.1684 | 22.937  | 9.8789  | H | 13.8761 | 36.7579 | -3.5711 |
| C | 21.3043 | 27.8541 | -0.0353 | C  | 22.6036 | 23.8587 | 10.9546 | C | 13.8186 | 36.5484 | -1.4169 |
| H | 22.2482 | 27.2953 | 0.0301  | H  | 21.8804 | 24.5581 | 11.4048 | H | 14.0058 | 37.6207 | -1.239  |
| C | 21.3466 | 29.2295 | -0.297  | C  | 23.882  | 23.8649 | 11.371  | C | 13.6544 | 35.6837 | -0.3343 |
| C | 20.1404 | 29.9373 | -0.381  | H  | 24.191  | 24.5532 | 12.1734 | H | 13.7089 | 36.0811 | 0.6924  |
| H | 20.1585 | 31.0113 | -0.6213 | C  | 19.3369 | 20.4511 | -1.7628 | C | 13.4186 | 34.3266 | -0.5567 |
| N | 19.4502 | 36.1014 | 10.1324 | C  | 19.9876 | 19.9778 | -2.9984 | C | 13.3344 | 33.8478 | -1.8734 |
| N | 21.308  | 35.4657 | 8.3583  | H  | 19.4417 | 19.9971 | -3.9568 | C | 13.5227 | 33.3236 | 1.7769  |
| N | 21.8394 | 33.0169 | 9.3665  | C  | 21.2449 | 19.5256 | -2.9377 | H | 13.8445 | 34.2359 | 2.304   |
| N | 27.1533 | 32.6955 | -2.0329 | H  | 21.7456 | 19.1674 | -3.852  | C | 13.4714 | 31.9955 | 2.4252  |
| N | 26.9731 | 33.2847 | 0.546   | C  | 21.9621 | 19.5038 | -1.6426 | C | 13.8461 | 31.7989 | 3.6945  |
| N | 27.0878 | 30.7269 | 1.4302  | C  | 23.2729 | 19.0367 | -1.5315 | H | 14.158  | 32.6684 | 4.294   |

---

|   |         |         |         |   |         |         |         |   |         |         |         |
|---|---------|---------|---------|---|---------|---------|---------|---|---------|---------|---------|
| N | 26.8137 | 21.9342 | 12.5842 | H | 23.8058 | 18.6703 | -2.4241 | C | 13.8844 | 30.4425 | 4.2882  |
| N | 26.9503 | 24.5663 | 12.3196 | C | 23.9149 | 19.0297 | -0.2918 | C | 13.4951 | 29.4144 | 3.5178  |
| N | 26.8802 | 24.59   | 9.6205  | H | 24.9504 | 18.6585 | -0.2129 | H | 13.5127 | 28.3789 | 3.8945  |
| C | 18.4807 | 36.3756 | 11.0687 | C | 23.253  | 19.4877 | 0.848   | C | 13.0688 | 29.6781 | 2.1295  |
| C | 17.6249 | 37.5712 | 10.9558 | H | 23.771  | 19.4744 | 1.8208  | H | 12.7443 | 28.8504 | 1.4799  |
| H | 16.8558 | 37.7788 | 11.7188 | C | 21.9428 | 19.9565 | 0.7498  | C | 16.0007 | 30.9363 | 7.3936  |
| C | 17.7977 | 38.3975 | 9.9183  | C | 21.3027 | 19.9635 | -0.499  | C | 15.4988 | 29.9193 | 8.2087  |
| H | 17.1665 | 39.2958 | 9.8189  | C | 21.3655 | 20.6153 | 3.1555  | H | 15.9679 | 29.7392 | 9.1846  |
| C | 18.8333 | 38.1032 | 8.902   | H | 22.335  | 20.3662 | 3.6155  | C | 14.4298 | 29.1034 | 7.8201  |
| C | 19.0412 | 38.9308 | 7.7972  | C | 20.2444 | 21.2164 | 3.91    | C | 13.9002 | 29.2679 | 6.5347  |
| H | 18.4278 | 39.8367 | 7.6631  | C | 20.3258 | 21.5171 | 5.2112  | H | 13.0588 | 28.6381 | 6.2076  |
| C | 20.0227 | 38.615  | 6.8562  | H | 21.2456 | 21.2436 | 5.7492  | C | 14.4069 | 30.2478 | 5.6709  |
| H | 20.1797 | 39.2738 | 5.9857  | C | 19.2282 | 22.2233 | 5.9156  | C | 15.4428 | 31.075  | 6.121   |
| C | 20.8025 | 37.4678 | 7.0078  | C | 18.1421 | 22.5475 | 5.1928  | H | 15.8323 | 31.8462 | 5.4427  |
| H | 21.5704 | 37.2281 | 6.2543  | H | 17.2987 | 23.1049 | 5.6289  | H | 10.6033 | 33.5095 | 0.4929  |
| C | 20.6039 | 36.6323 | 8.1072  | C | 18.0784 | 22.1682 | 3.7692  | H | 20.1502 | 18.0313 | 2.2456  |
| C | 19.6216 | 36.9592 | 9.0549  | H | 17.1992 | 22.4315 | 3.1609  | H | 29.5545 | 33.3814 | 0.6331  |
| C | 22.2228 | 34.7037 | 7.6777  | C | 10.2371 | 26.0472 | 12.9579 | H | 18.3613 | 35.6864 | 11.9191 |
| H | 22.6857 | 35.0989 | 6.7595  | C | 8.7641  | 26.1104 | 12.9308 | H | 27.4578 | 31.2573 | -3.5735 |
| C | 22.5102 | 33.3539 | 8.2091  | H | 8.2304  | 26.8992 | 13.4876 | H | 26.775  | 19.9752 | 11.7398 |
| C | 23.3475 | 32.5019 | 7.606   | C | 8.0883  | 25.1979 | 12.2239 | H | 29.5713 | 24.3723 | 12.1832 |
| H | 23.8851 | 32.8551 | 6.7141  | H | 6.9868  | 25.2294 | 12.1947 | H | 18.302  | 20.826  | -1.7902 |
| C | 23.5373 | 31.1156 | 8.0989  | C | 8.8198  | 24.1437 | 11.485  | H | 10.8127 | 26.7872 | 13.5355 |
| C | 22.8244 | 30.7494 | 9.1791  | C | 8.1553  | 23.1662 | 10.7424 | H | 23.0611 | 36.5058 | 9.9741  |
| H | 22.871  | 29.7302 | 9.5918  | H | 7.0542  | 23.1649 | 10.6919 | H | 12.3057 | 21.7967 | 13.2314 |
| C | 21.9365 | 31.7289 | 9.8323  | C | 8.8799  | 22.1832 | 10.0662 | H | 12.8133 | 30.9098 | -3.4579 |

---

**Table S12.** Cartesian coordinates (in Å) for the PM7 model of **1** with  $D_2$  symmetry

|   |         |         |         |    |         |         |         |   |         |         |         |
|---|---------|---------|---------|----|---------|---------|---------|---|---------|---------|---------|
| C | 1.4947  | -8.7347 | -7.603  | C  | -10.866 | -7.2117 | 4.3695  | H | 1.5131  | -6.0265 | -7.5407 |
| C | 0.1312  | -8.4285 | -7.546  | C  | -9.8669 | -7.5891 | 3.4515  | H | 4.9259  | -5.5782 | -4.9514 |
| C | -0.8002 | -9.2882 | -8.1473 | N  | -8.7459 | -4.2903 | 2.2351  | H | 3.7174  | -9.4997 | -6.2605 |
| N | -0.4367 | -10.429 | -8.7572 | C  | -9.0047 | -3.0006 | 2.4587  | C | 3.477   | -10.714 | 3.8355  |
| C | 0.8906  | -10.72  | -8.8376 | C  | -9.9763 | -2.5586 | 3.392   | C | 4.4187  | -10.694 | 2.8012  |
| C | 1.8789  | -9.8954 | -8.288  | C  | -10.703 | -3.4819 | 4.1033  | C | 5.2785  | -9.6005 | 2.6425  |
| C | 1.2251  | -11.984 | -9.5457 | H  | -4.1671 | -7.7713 | -2.5223 | C | 5.1689  | -8.5096 | 3.513   |
| N | 0.2295  | -12.758 | -9.8294 | H  | -5.5756 | -5.8079 | -1.8551 | C | 4.2191  | -8.5075 | 4.5406  |
| C | 0.2973  | -13.98  | -10.512 | H  | -6.1572 | -10.096 | 0.521   | C | 3.4004  | -9.6289 | 4.7163  |
| C | -0.9625 | -14.68  | -10.582 | H  | -7.9276 | -8.9734 | 1.8981  | H | 5.8374  | -7.6541 | 3.3931  |
| C | -1.0339 | -15.918 | -11.262 | H  | -11.941 | -5.5966 | 5.3169  | H | 2.7055  | -9.6663 | 5.5615  |
| C | 0.1329  | -16.437 | -11.885 | H  | -11.426 | -7.9975 | 4.9026  | H | 4.478   | -11.535 | 2.1092  |
| C | 1.3235  | -15.749 | -11.818 | H  | -9.6751 | -8.6539 | 3.2941  | C | 0.6935  | -0.9029 | -1.2221 |
| C | 1.4146  | -14.524 | -11.128 | H  | -8.4282 | -2.2663 | 1.8781  | C | 2.0357  | -1.1388 | -1.5349 |
| N | -2.0702 | -14.102 | -9.9871 | H  | -10.142 | -1.4804 | 3.524   | C | 2.5776  | -0.6095 | -2.7161 |
| C | -3.2283 | -14.763 | -10.038 | H  | -11.481 | -3.1689 | 4.8212  | N | 1.8451  | 0.1043  | -3.5877 |
| C | -3.3726 | -16.015 | -10.686 | C  | -3.0696 | -3.2049 | 1.1076  | C | 0.5434  | 0.356   | -3.2772 |
| C | -2.2884 | -16.587 | -11.305 | C  | -3.3597 | -4.3815 | 1.8048  | C | -0.0601 | -0.1212 | -2.1083 |
| H | -0.2191 | -7.5291 | -7.0444 | C  | -4.657  | -4.9154 | 1.7617  | C | -0.2    | 1.1802  | -4.2647 |
| H | -1.8751 | -9.0536 | -8.1472 | N  | -5.6453 | -4.3556 | 1.0429  | N | 0.4054  | 1.4167  | -5.3821 |
| H | 2.935   | -10.145 | -8.4075 | C  | -5.3708 | -3.2047 | 0.3683  | C | -0.0831 | 2.1967  | -6.4395 |
| H | 2.2832  | -12.162 | -9.7769 | C  | -4.1102 | -2.5992 | 0.3879  | C | 0.7652  | 2.1954  | -7.6062 |
| H | 0.0694  | -17.397 | -12.429 | C  | -6.5041 | -2.6224 | -0.3949 | C | 0.3969  | 2.9648  | -8.7344 |
| H | 2.2223  | -16.151 | -12.314 | N  | -7.5756 | -3.3417 | -0.4657 | C | -0.791  | 3.7429  | -8.6878 |
| H | 2.3779  | -14.007 | -11.103 | C  | -8.7748 | -2.9754 | -1.0933 | C | -1.5823 | 3.7401  | -7.5609 |
| H | -4.0953 | -14.292 | -9.5511 | C  | -9.7684 | -4.0205 | -1.107  | C | -1.2379 | 2.9657  | -6.4364 |
| H | -4.3562 | -16.506 | -10.693 | C  | -11.036 | -3.7673 | -1.6817 | N | 1.9278  | 1.4458  | -7.573  |
| H | -2.3745 | -17.552 | -11.836 | C  | -11.313 | -2.4802 | -2.2162 | C | 2.6983  | 1.4329  | -8.6624 |
| C | -2.8838 | -11.897 | -4.5533 | C  | -10.354 | -1.4925 | -2.1861 | C | 2.3851  | 2.1631  | -9.8368 |
| C | -1.6107 | -12.357 | -4.9051 | C  | -9.0823 | -1.7345 | -1.6318 | C | 1.2495  | 2.9347  | -9.873  |
| C | -1.2858 | -12.537 | -6.258  | N  | -9.4463 | -5.2399 | -0.5377 | H | 2.6683  | -1.7238 | -0.8704 |
| N | -2.1473 | -12.25  | -7.2486 | C  | -10.362 | -6.2096 | -0.5746 | H | 3.6379  | -0.754  | -2.9706 |
| C | -3.3958 | -11.825 | -6.9121 | C  | -11.647 | -6.0364 | -1.1477 | H | -1.0967 | 0.1297  | -1.8791 |
| C | -3.8012 | -11.651 | -5.5837 | C  | -11.991 | -4.8212 | -1.6873 | H | -1.1969 | 1.5322  | -3.9718 |
| C | -4.3057 | -11.549 | -8.0542 | H  | -2.5915 | -4.8879 | 2.386   | H | -1.0667 | 4.3558  | -9.5655 |
| N | -3.7642 | -11.553 | -9.2279 | H  | -4.9171 | -5.8212 | 2.3284  | H | -2.4962 | 4.3557  | -7.5265 |
| C | -4.425  | -11.346 | -10.447 | H  | -3.9429 | -1.6558 | -0.1344 | H | -1.8895 | 2.9963  | -5.5591 |
| C | -3.5437 | -11.298 | -11.588 | H  | -6.3515 | -1.6287 | -0.8348 | H | 3.6134  | 0.8242  | -8.6212 |
| C | -4.0885 | -11.115 | -12.88  | H  | -12.31  | -2.2811 | -2.6495 | H | 3.064   | 2.1087  | -10.7   |
| C | -5.4969 | -11.004 | -13.032 | H  | -10.579 | -0.4925 | -2.5927 | H | 0.9898  | 3.5308  | -10.766 |
| C | -6.3229 | -11.063 | -11.932 | H  | -8.3518 | -0.9211 | -1.6213 | C | 2.9476  | -4.1925 | -6.1758 |
| C | -5.7943 | -11.228 | -10.637 | H  | -10.085 | -7.1768 | -0.1312 | C | 1.6521  | -3.6928 | -6.0116 |
| N | -2.1845 | -11.448 | -11.377 | H  | -12.355 | -6.8766 | -1.141  | C | 1.4448  | -2.3065 | -5.9498 |
| C | -1.3725 | -11.384 | -12.434 | H  | -12.992 | -4.6492 | -2.1212 | N | 2.4556  | -1.4235 | -6.0167 |
| C | -1.8438 | -11.188 | -13.756 | Zn | -7.7158 | -5.1409 | 0.6297  | C | 3.7167  | -1.9037 | -6.1985 |

---

|    |         |         |         |   |        |         |         |    |         |         |         |
|----|---------|---------|---------|---|--------|---------|---------|----|---------|---------|---------|
| C  | -3.1926 | -11.065 | -13.984 | C | 6.2856 | -9.592  | 1.5661  | C  | 3.998   | -3.2717 | -6.2897 |
| H  | -0.8677 | -12.582 | -4.1432 | C | 6.567  | -8.4238 | 0.8512  | C  | 4.7827  | -0.8736 | -6.2999 |
| H  | -0.304  | -12.93  | -6.5608 | C | 7.5327 | -8.445  | -0.167  | N  | 4.4304  | 0.3402  | -6.0295 |
| H  | -4.8239 | -11.345 | -5.3544 | N | 8.1909 | -9.5642 | -0.5149 | C  | 5.2506  | 1.4753  | -6.0954 |
| H  | -5.3624 | -11.368 | -7.8186 | C | 7.9265 | -10.704 | 0.1828  | C  | 4.6132  | 2.6835  | -5.6316 |
| H  | -5.9196 | -10.877 | -14.045 | C | 6.9984 | -10.752 | 1.2282  | C  | 5.326   | 3.9045  | -5.6702 |
| H  | -7.4157 | -10.988 | -12.057 | C | 8.6927 | -11.905 | -0.2363 | C  | 6.6491  | 3.9214  | -6.1878 |
| H  | -6.4853 | -11.275 | -9.7908 | N | 9.4077 | -11.783 | -1.3063 | C  | 7.2363  | 2.7598  | -6.6373 |
| H  | -0.2947 | -11.496 | -12.245 | C | 10.238 | -12.768 | -1.8592 | C  | 6.5459  | 1.5335  | -6.5888 |
| H  | -1.1208 | -11.148 | -14.583 | C | 10.844 | -12.385 | -3.1111 | N  | 3.3086  | 2.6058  | -5.1769 |
| H  | -3.5912 | -10.931 | -15.005 | C | 11.731 | -13.279 | -3.7561 | C  | 2.7308  | 3.7229  | -4.731  |
| Zn | -1.747  | -12.12  | -9.4638 | C | 12.024 | -14.529 | -3.1476 | C  | 3.3885  | 4.979   | -4.7199 |
| C  | 4.0509  | -7.3218 | 5.4007  | C | 11.442 | -14.873 | -1.9484 | C  | 4.6727  | 5.0764  | -5.1969 |
| C  | 2.7705  | -6.9061 | 5.7804  | C | 10.545 | -14.001 | -1.3019 | H  | 0.8005  | -4.366  | -5.9372 |
| C  | 2.6178  | -5.7517 | 6.5629  | N | 10.542 | -11.14  | -3.6324 | H  | 0.4331  | -1.8862 | -5.8521 |
| N  | 3.6627  | -4.9965 | 6.9419  | C | 11.089 | -10.801 | -4.8017 | H  | 5.0175  | -3.6161 | -6.4683 |
| C  | 4.9131  | -5.4083 | 6.5952  | C | 11.973 | -11.649 | -5.5148 | H  | 5.7801  | -1.2153 | -6.603  |
| C  | 5.1449  | -6.5653 | 5.8422  | C | 12.305 | -12.875 | -4.9934 | H  | 7.1969  | 4.8805  | -6.2318 |
| C  | 6.024   | -4.5404 | 7.0662  | H | 6.0482 | -7.4943 | 1.0776  | H  | 8.2583  | 2.7818  | -7.05   |
| N  | 5.6806  | -3.4042 | 7.5779  | H | 7.7943 | -7.5316 | -0.7205 | H  | 7.0452  | 0.6351  | -6.9616 |
| C  | 6.5463  | -2.4379 | 8.1095  | H | 6.8452 | -11.676 | 1.7879  | H  | 1.6969  | 3.6402  | -4.365  |
| C  | 5.8856  | -1.2189 | 8.5086  | H | 8.6004 | -12.8   | 0.3917  | H  | 2.8542  | 5.8608  | -4.3389 |
| C  | 6.6446  | -0.1719 | 9.0816  | H | 12.731 | -15.217 | -3.6467 | H  | 5.2031  | 6.0448  | -5.2214 |
| C  | 8.0414  | -0.3497 | 9.2726  | H | 11.682 | -15.84  | -1.476  | Zn | 2.4042  | 0.7975  | -5.656  |
| C  | 8.6522  | -1.5247 | 8.8956  | H | 10.11  | -14.31  | -0.3478 | C  | -2.4172 | -13.146 | 0.2422  |
| C  | 7.9129  | -2.5699 | 8.3089  | H | 10.828 | -9.8135 | -5.2087 | C  | -1.1132 | -13.634 | 0.1159  |
| N  | 4.5171  | -1.1228 | 8.3285  | H | 12.391 | -11.306 | -6.4716 | C  | -0.5806 | -14.461 | 1.1168  |
| C  | 3.9138  | 0.0135  | 8.6828  | H | 13.008 | -13.549 | -5.5149 | N  | -1.2699 | -14.787 | 2.2232  |
| C  | 4.6106  | 1.1116  | 9.2478  | C | 5.5959 | -8.1991 | -4.8209 | C  | -2.5476 | -14.332 | 2.3415  |
| C  | 5.9648  | 1.0197  | 9.4579  | C | 5.4594 | -9.4053 | -4.1272 | C  | -3.1532 | -13.522 | 1.3741  |
| H  | 1.8887  | -7.4683 | 5.4812  | C | 6.5638 | -9.9516 | -3.4551 | C  | -3.2651 | -14.758 | 3.5708  |
| H  | 1.6253  | -5.4221 | 6.9044  | N | 7.7616 | -9.3426 | -3.4201 | N  | -2.5535 | -15.357 | 4.4681  |
| H  | 6.1652  | -6.8825 | 5.6177  | C | 7.9026 | -8.171  | -4.1    | C  | -3.0205 | -15.879 | 5.6824  |
| H  | 7.0444  | -4.9276 | 6.9495  | C | 6.8552 | -7.5816 | -4.8156 | C  | -1.9782 | -16.399 | 6.5336  |
| H  | 8.6283  | 0.4649  | 9.7345  | C | 9.2513 | -7.5519 | -4.0383 | C  | -2.321  | -16.98  | 7.7768  |
| H  | 9.7341  | -1.6612 | 9.058   | N | 10.098 | -8.1033 | -3.2319 | C  | -3.6886 | -17.059 | 8.1539  |
| H  | 8.4353  | -3.4889 | 8.0289  | C | 11.433 | -7.7163 | -3.0465 | C  | -4.6703 | -16.567 | 7.3232  |
| H  | 2.8272  | 0.0746  | 8.5231  | C | 12.115 | -8.4524 | -2.0109 | C  | -4.3436 | -15.972 | 6.0896  |
| H  | 4.0523  | 2.0183  | 9.5203  | C | 13.478 | -8.1809 | -1.7481 | N  | -0.6694 | -16.325 | 6.0907  |
| H  | 6.5313  | 1.8504  | 9.9143  | C | 14.155 | -7.2015 | -2.524  | C  | 0.2919  | -16.791 | 6.8905  |
| C  | 1.1315  | -2.1511 | 3.5773  | C | 13.488 | -6.5155 | -3.5145 | C  | 0.0273  | -17.37  | 8.1575  |
| C  | 2.5032  | -2.4103 | 3.4903  | C | 12.127 | -6.7634 | -3.7772 | C  | -1.2697 | -17.477 | 8.5965  |
| C  | 3.2635  | -2.5328 | 4.6632  | N | 11.408 | -9.4185 | -1.3173 | H  | -0.5072 | -13.387 | -0.7534 |
| N  | 2.7165  | -2.4435 | 5.8872  | C | 12.04  | -10.082 | -0.3471 | H  | 0.4304  | -14.885 | 1.027   |
| C  | 1.3865  | -2.168  | 5.9787  | C | 13.399 | -9.8538 | -0.0149 | H  | -4.1907 | -13.205 | 1.4888  |
| C  | 0.5709  | -2.0027 | 4.8531  | C | 14.121 | -8.9195 | -0.7164 | H  | -4.3395 | -14.542 | 3.622   |
| C  | 0.8505  | -2.0598 | 7.3605  | H | 4.5063 | -9.93   | -4.1054 | H  | -3.9538 | -17.529 | 9.119   |

---

---

|    |         |         |         |    |         |         |         |    |         |         |        |
|----|---------|---------|---------|----|---------|---------|---------|----|---------|---------|--------|
| N  | 1.6463  | -2.4273 | 8.3106  | H  | 6.4894  | -10.915 | -2.9309 | H  | -5.7305 | -16.643 | 7.6157 |
| C  | 1.3696  | -2.3902 | 9.6845  | H  | 7.021   | -6.6625 | -5.3802 | H  | -5.153  | -15.6   | 5.4558 |
| C  | 2.4066  | -2.9676 | 10.505  | H  | 9.4308  | -6.6816 | -4.6822 | H  | 1.3269  | -16.714 | 6.5261 |
| C  | 2.2588  | -2.9727 | 11.911  | H  | 15.224  | -7.0036 | -2.3264 | H  | 0.8664  | -17.735 | 8.7662 |
| C  | 1.1     | -2.3891 | 12.491  | H  | 14.022  | -5.7648 | -4.1209 | H  | -1.509  | -17.942 | 9.569  |
| C  | 0.1258  | -1.8337 | 11.692  | H  | 11.637  | -6.2017 | -4.5769 | C  | 2.5489  | -11.85  | 3.985  |
| C  | 0.2509  | -1.8356 | 10.289  | H  | 11.46   | -10.837 | 0.203   | C  | 1.1979  | -11.622 | 4.2649 |
| N  | 3.5261  | -3.4883 | 9.8803  | H  | 13.859  | -10.439 | 0.7936  | C  | 0.3204  | -12.71  | 4.3865 |
| C  | 4.4733  | -4.0384 | 10.643  | H  | 15.187  | -8.7349 | -0.4954 | N  | 0.7219  | -13.981 | 4.2169 |
| C  | 4.3874  | -4.0952 | 12.057  | Zn | 9.5985  | -9.8998 | -2.2414 | C  | 2.0403  | -14.21  | 3.9648 |
| C  | 3.2948  | -3.5573 | 12.692  | C  | -2.9824 | -12.26  | -0.7921 | C  | 2.9777  | -13.177 | 3.8507 |
| H  | 2.9921  | -2.5146 | 2.5242  | C  | -2.7579 | -12.534 | -2.1462 | C  | 2.4232  | -15.639 | 3.8228 |
| H  | 4.3497  | -2.7021 | 4.6229  | C  | -3.2213 | -11.661 | -3.1374 | N  | 1.4498  | -16.488 | 3.7752 |
| H  | -0.4836 | -1.7442 | 4.969   | C  | -3.9736 | -10.542 | -2.7649 | C  | 1.5694  | -17.882 | 3.6828 |
| H  | -0.1717 | -1.6752 | 7.4712  | C  | -4.2325 | -10.271 | -1.416  | C  | 0.3084  | -18.567 | 3.5371 |
| H  | 0.9956  | -2.3814 | 13.591  | C  | -3.7218 | -11.128 | -0.4337 | C  | 0.2895  | -19.979 | 3.4595 |
| H  | -0.7655 | -1.3721 | 12.148  | H  | -4.37   | -9.8761 | -3.5347 | C  | 1.5122  | -20.697 | 3.5492 |
| H  | -0.5431 | -1.3795 | 9.6915  | H  | -3.8953 | -10.908 | 0.6202  | C  | 2.705   | -20.026 | 3.6997 |
| H  | 5.351   | -4.4558 | 10.127  | H  | -2.2309 | -13.45  | -2.4329 | C  | 2.7418  | -18.619 | 3.7615 |
| H  | 5.2046  | -4.5606 | 12.626  | C  | -1.7177 | -2.618  | 1.1338  | N  | -0.8499 | -17.811 | 3.4947 |
| H  | 3.2088  | -3.5686 | 13.792  | C  | -1.1687 | -2.0522 | -0.023  | C  | -2.0115 | -18.449 | 3.3409 |
| Zn | 3.6434  | -2.9498 | 7.8802  | C  | 0.1041  | -1.472  | 0.0035  | C  | -2.1079 | -19.86  | 3.2369 |
| C  | -5.0301 | -9.0911 | -1.0363 | C  | 0.8289  | -1.4603 | 1.2007  | C  | -0.9692 | -20.625 | 3.3074 |
| C  | -4.8779 | -7.8725 | -1.7046 | C  | 0.3144  | -2.0663 | 2.3527  | H  | 0.8186  | -10.611 | 4.3962 |
| C  | -5.654  | -6.767  | -1.3231 | C  | -0.9675 | -2.626  | 2.3158  | H  | -0.7401 | -12.561 | 4.6373 |
| N  | -6.5319 | -6.8168 | -0.3064 | H  | 1.7997  | -0.9557 | 1.2406  | H  | 4.0314  | -13.403 | 3.6809 |
| C  | -6.6895 | -8.0033 | 0.3433  | H  | -1.3914 | -3.0671 | 3.2207  | H  | 3.4953  | -15.867 | 3.7782 |
| C  | -5.9721 | -9.1541 | 0.0008  | H  | -1.7345 | -2.0693 | -0.9552 | H  | 1.4916  | -21.801 | 3.5043 |
| C  | -7.6831 | -8.0033 | 1.4471  | C  | 4.4556  | -7.6026 | -5.5397 | H  | 3.649   | -20.589 | 3.7815 |
| N  | -8.1774 | -6.8543 | 1.7729  | C  | 3.562   | -8.4187 | -6.2435 | H  | 3.7086  | -18.125 | 3.8881 |
| C  | -9.1571 | -6.6256 | 2.7497  | C  | 2.4783  | -7.8638 | -6.9332 | H  | -2.9207 | -17.832 | 3.3001 |
| C  | -9.448  | -5.2303 | 2.9688  | C  | 2.3153  | -6.4738 | -6.9448 | H  | -3.0972 | -20.322 | 3.1121 |
| C  | -10.444 | -4.8665 | 3.905   | C  | 3.1823  | -5.6474 | -6.2208 | H  | -1.0143 | -21.727 | 3.2508 |
| C  | -11.153 | -5.8846 | 4.5979  | C  | 4.2511  | -6.2179 | -5.5213 | Zn | -0.5368 | -15.84  | 4.0739 |

---

**Table S13.** Cartesian coordinates (in Å) for the PM7 model of **1** with *T* symmetry

|   |         |         |         |    |         |         |          |    |          |          |         |
|---|---------|---------|---------|----|---------|---------|----------|----|----------|----------|---------|
| C | 2.7607  | -2.4584 | 3.8514  | C  | 3.5273  | -8.409  | -12.4125 | H  | -3.0611  | 2.4544   | -0.8538 |
| C | 2.9789  | -1.6668 | 2.7944  | C  | 4.0059  | -8.0352 | -11.1572 | H  | -8.336   | -1.4021  | -1.5526 |
| C | 4.3528  | -1.2253 | 2.5011  | N  | 2.4372  | -4.7958 | -10.7884 | H  | -9.4321  | 0.1564   | -3.2591 |
| N | 5.3463  | -1.5785 | 3.2218  | C  | 1.6638  | -3.9745 | -11.3938 | H  | -8.2596  | 2.2336   | -3.9108 |
| C | 5.1808  | -2.3256 | 4.2617  | C  | 1.1021  | -4.2597 | -12.7266 | C  | -3.9512  | -4.2368  | -3.2835 |
| C | 3.9721  | -2.7756 | 4.6375  | C  | 1.4107  | -5.4115 | -13.3177 | C  | -3.303   | -3.0744  | -3.1394 |
| C | 6.4066  | -2.7074 | 5.0318  | H  | 5.0862  | -3.6553 | -4.2752  | C  | -3.796   | -2.095   | -2.157  |
| N | 7.5235  | -2.2779 | 4.5824  | H  | 3.8252  | -3.0869 | -6.3781  | N  | -4.8233  | -2.3209  | -1.4334 |
| C | 8.7649  | -2.3628 | 4.8877  | H  | 6.1494  | -7.36   | -6.295   | C  | -5.493   | -3.4181  | -1.5523 |
| C | 9.6906  | -1.689  | 4.0376  | H  | 5.2798  | -7.8339 | -8.5662  | C  | -5.147   | -4.3791  | -2.4251 |
| C | 11.06   | -1.7597 | 4.3375  | H  | 2.3094  | -7.8624 | -14.1139 | C  | -6.6718  | -3.6006  | -0.6474 |
| C | 11.5018 | -2.4818 | 5.449   | H  | 3.8183  | -9.3809 | -12.8457 | N  | -6.9061  | -2.6606  | 0.1868  |
| C | 10.5899 | -3.14   | 6.2731  | H  | 4.6729  | -8.7176 | -10.6084 | C  | -7.7498  | -2.4049  | 1.1165  |
| C | 9.2248  | -3.0814 | 5.9948  | H  | 1.4094  | -3.0214 | -10.9043 | C  | -7.5931  | -1.1715  | 1.8149  |
| N | 9.2437  | -1.0319 | 3.0131  | H  | 0.4406  | -3.5274 | -13.2169 | C  | -8.4969  | -0.855   | 2.8412  |
| C | 10.0349 | -0.4095 | 2.2219  | H  | 1.0146  | -5.6679 | -14.314  | C  | -9.5271  | -1.7396  | 3.1704  |
| C | 11.496  | -0.3983 | 2.4185  | C  | -0.6552 | -5.9154 | -6.7092  | C  | -9.6706  | -2.9452  | 2.4851  |
| C | 12.0073 | -1.0589 | 3.4546  | C  | 0.1133  | -6.9062 | -7.178   | C  | -8.7856  | -3.2782  | 1.4602  |
| H | 2.1797  | -1.3598 | 2.1053  | C  | 1.3361  | -6.5722 | -7.9269  | N  | -6.6223  | -0.378   | 1.4846  |
| H | 4.5307  | -0.5967 | 1.6147  | N  | 1.6904  | -5.3642 | -8.1403  | C  | -6.4419  | 0.7409   | 2.0802  |
| H | 3.9072  | -3.4135 | 5.5297  | C  | 0.9706  | -4.3765 | -7.7244  | C  | -7.317   | 1.2      | 3.1742  |
| H | 6.3447  | -3.342  | 5.9288  | C  | -0.1731 | -4.5582 | -7.0438  | C  | -8.3281  | 0.4222   | 3.5539  |
| H | 12.5789 | -2.5345 | 5.6783  | C  | 1.4772  | -2.9958 | -8.0041  | H  | -2.3884  | -2.8273  | -3.6957 |
| H | 10.9497 | -3.7088 | 7.1471  | N  | 2.5957  | -2.9082 | -8.6166  | H  | -3.2424  | -1.1526  | -2.0229 |
| H | 8.5164  | -3.6063 | 6.6538  | C  | 3.3807  | -1.9843 | -9.0308  | H  | -5.7579  | -5.2914  | -2.4649 |
| H | 9.6114  | 0.1375  | 1.3651  | C  | 4.5807  | -2.3953 | -9.6822  | H  | -7.2913  | -4.5093  | -0.6902 |
| H | 12.145  | 0.1495  | 1.7166  | C  | 5.4679  | -1.4128 | -10.1489 | H  | -10.2328 | -1.4857  | 3.9785  |
| H | 13.0934 | -1.0783 | 3.6418  | C  | 5.1755  | -0.058  | -9.9721  | H  | -10.4862 | -3.6372  | 2.7546  |
| C | 7.3962  | -4.5882 | -0.3704 | C  | 4.0013  | 0.3348  | -9.3312  | H  | -8.9106  | -4.2336  | 0.9279  |
| C | 7.5611  | -4.9855 | 0.8971  | C  | 3.1051  | -0.6245 | -8.8614  | H  | -5.6057  | 1.3845   | 1.765   |
| C | 7.5647  | -3.9754 | 1.969   | N  | 4.8198  | -3.6617 | -9.8247  | H  | -7.1309  | 2.1702   | 3.6621  |
| N | 7.4113  | -2.7305 | 1.7277  | C  | 5.8823  | -4.0798 | -10.404  | H  | -9.0088  | 0.7241   | 4.3667  |
| C | 7.2727  | -2.3003 | 0.5185  | C  | 6.8991  | -3.1582 | -10.943  | Zn | -5.6166  | -1.2202  | 0.0084  |
| C | 7.27    | -3.1251 | -0.5409 | C  | 6.7033  | -1.8474 | -10.8216 | C  | 3.6313   | -13.7108 | 0.8757  |
| C | 7.0786  | -0.8277 | 0.3326  | H  | -0.1049 | -7.9676 | -6.9964  | C  | 4.5873   | -13.1759 | 1.6449  |
| N | 7.0435  | -0.1158 | 1.3932  | H  | 1.9787  | -7.3909 | -8.2868  | C  | 5.9853   | -13.2186 | 1.1837  |
| C | 6.8894  | 1.1178  | 1.7027  | H  | -0.7294 | -3.6704 | -6.7132  | N  | 6.315    | -13.7475 | 0.0688  |
| C | 6.9135  | 1.4469  | 3.0898  | H  | 0.9188  | -2.1044 | -7.6801  | C  | 5.4296   | -14.2963 | -0.6936 |
| C | 6.7467  | 2.7877  | 3.47    | H  | 5.877   | 0.7088  | -10.3401 | C  | 4.1269   | -14.3328 | -0.3706 |
| C | 6.558   | 3.7768  | 2.5013  | H  | 3.7811  | 1.4072  | -9.1953  | C  | 5.9045   | -14.8731 | -1.9907 |
| C | 6.5329  | 3.4455  | 1.1472  | H  | 2.1822  | -0.3002 | -8.3567  | N  | 7.1502   | -14.7542 | -2.2485 |
| C | 6.6982  | 2.12    | 0.7473  | H  | 6.0437  | -5.1644 | -10.5047 | C  | 7.9561   | -15.0635 | -3.1951 |
| N | 7.0875  | 0.5013  | 3.96    | H  | 7.8009  | -3.5556 | -11.4359 | C  | 9.3233   | -14.6942 | -3.0302 |
| C | 7.1183  | 0.7474  | 5.216   | H  | 7.4357  | -1.1206 | -11.2094 | C  | 10.2374  | -15.0135 | -4.0464 |
| C | 6.9582  | 2.1103  | 5.755   | Zn | 3.3171  | -4.6637 | -9.0256  | C  | 9.8077   | -15.6785 | -5.1977 |



---

|    |          |          |         |   |         |          |         |    |         |          |         |
|----|----------|----------|---------|---|---------|----------|---------|----|---------|----------|---------|
| C  | 6.7752   | 3.1175   | 4.9045  | C | -0.0545 | -12.3595 | 4.0422  | C  | 8.4681  | -16.0329 | -5.3518 |
| H  | 7.653    | -6.0427  | 1.1824  | C | -1.2614 | -11.8147 | 4.238   | C  | 7.5435  | -15.7274 | -4.3539 |
| H  | 7.6705   | -4.3093  | 3.013   | C | -1.5542 | -11.1666 | 5.5275  | N  | 9.6839  | -14.0741 | -1.95   |
| H  | 7.1378   | -2.6877  | -1.54   | N | -0.6902 | -11.1036 | 6.4657  | C  | 10.8998 | -13.7232 | -1.7559 |
| H  | 6.9541   | -0.3882  | -0.6687 | C | 0.4796  | -11.6322 | 6.3288  | C  | 11.964  | -13.9966 | -2.7388 |
| H  | 6.4268   | 4.8279   | 2.8066  | C | 0.855   | -12.2631 | 5.204   | C  | 11.6472 | -14.6296 | -3.8658 |
| H  | 6.3817   | 4.2341   | 0.3908  | C | 1.4327  | -11.4912 | 7.4748  | H  | 4.3721  | -12.6643 | 2.5933  |
| H  | 6.676    | 1.8728   | -0.3252 | N | 1.0153  | -10.8381 | 8.4912  | H  | 6.7643  | -12.7503 | 1.8053  |
| H  | 7.2709   | -0.086   | 5.9195  | C | 1.4647  | -10.4713 | 9.6336  | H  | 3.43    | -14.808  | -1.0743 |
| H  | 6.9915   | 2.283    | 6.8427  | C | 0.5891  | -9.7095  | 10.462  | H  | 5.2075  | -15.3567 | -2.6917 |
| H  | 6.6515   | 4.1531   | 5.2612  | C | 1.0446  | -9.2876  | 11.7208 | H  | 10.5305 | -15.9251 | -5.9926 |
| Zn | 7.2765   | -1.2051  | 2.9833  | C | 2.3355  | -9.6097  | 12.1474 | H  | 8.1391  | -16.5559 | -6.2657 |
| C  | -1.1557  | -13.7756 | -0.675  | C | 3.1861  | -10.3525 | 11.3297 | H  | 6.489   | -16.0127 | -4.489  |
| C  | -0.7936  | -13.8138 | -1.9629 | C | 2.7534  | -10.7831 | 10.076  | H  | 11.1618 | -13.2001 | -0.8229 |
| C  | -1.8372  | -13.8479 | -2.9999 | N | -0.6008 | -9.4272  | 10.0311 | H  | 12.9997 | -13.6798 | -2.536  |
| N  | -3.0799  | -13.8361 | -2.7086 | C | -1.4239 | -8.7481  | 10.7386 | H  | 12.4093 | -14.856  | -4.6294 |
| C  | -3.4774  | -13.8151 | -1.4802 | C | -1.0781 | -8.2431  | 12.0798 | C  | 7.5266  | -9.3027  | -2.1681 |
| C  | -2.6167  | -13.7981 | -0.448  | C | 0.1318  | -8.5035  | 12.5692 | C  | 6.999   | -10.2435 | -2.9608 |
| C  | -4.9555  | -13.7808 | -1.2426 | H | -2.0389 | -11.7944 | 3.4617  | C  | 7.17    | -11.6614 | -2.6028 |
| N  | -5.7037  | -13.7557 | -2.2793 | H | -2.5393 | -10.6967 | 5.6739  | N  | 7.8033  | -12.0234 | -1.5547 |
| C  | -6.9563  | -13.7101 | -2.5461 | H | 1.8691  | -12.683  | 5.1557  | C  | 8.3449  | -11.1523 | -0.7707 |
| C  | -7.3275  | -13.6884 | -3.9228 | H | 2.4472  | -11.9157 | 7.4314  | C  | 8.2686  | -9.8313  | -1.0033 |
| C  | -8.6899  | -13.6385 | -4.2567 | H | 2.6873  | -9.2748  | 13.1371 | C  | 9.0485  | -11.6712 | 0.4449  |
| C  | -9.6607  | -13.6075 | -3.2524 | H | 4.2039  | -10.5999 | 11.6758 | N  | 9.0371  | -12.9377 | 0.618   |
| C  | -9.2891  | -13.6256 | -1.9087 | H | 3.4357  | -11.3687 | 9.441   | C  | 9.4733  | -13.7819 | 1.4774  |
| C  | -7.9412  | -13.6772 | -1.5547 | H | -2.4253 | -8.534   | 10.3337 | C  | 9.1903  | -15.1586 | 1.2371  |
| N  | -6.3991  | -13.7151 | -4.8272 | H | -1.8138 | -7.6627  | 12.6595 | C  | 9.6495  | -16.1146 | 2.1567  |
| C  | -6.6812  | -13.7    | -6.076  | H | 0.4346  | -8.1471  | 13.5674 | C  | 10.3688 | -15.7171 | 3.2866  |
| C  | -8.0699  | -13.6504 | -6.568  | C | -0.0071 | -6.047   | 6.0665  | C  | 10.639  | -14.3685 | 3.5149  |
| C  | -9.0619  | -13.6198 | -5.6813 | C | 1.0676  | -6.7641  | 6.4162  | C  | 10.1932 | -13.4022 | 2.6138  |
| H  | 0.2552   | -13.7819 | -2.2894 | C | 0.8762  | -8.0455  | 7.1169  | N  | 8.5175  | -15.4894 | 0.1792  |
| H  | -1.5338  | -13.8546 | -4.0584 | N | -0.2848 | -8.4975  | 7.3979  | C  | 8.2396  | -16.712  | -0.0805 |
| H  | -3.0215  | -13.7737 | 0.5734  | C | -1.3482 | -7.8296  | 7.0986  | C  | 8.6606  | -17.8183 | 0.7983  |
| H  | -5.3711  | -13.7614 | -0.2237 | C | -1.2978 | -6.6416  | 6.4748  | C  | 9.353   | -17.5335 | 1.8986  |
| H  | -10.7291 | -13.5678 | -3.5213 | C | -2.6664 | -8.4479  | 7.4463  | H  | 6.4055  | -10.006  | -3.8546 |
| H  | -10.0639 | -13.5993 | -1.1239 | N | -2.6317 | -9.6017  | 7.9948  | H  | 6.7114  | -12.43   | -3.2443 |
| H  | -7.6627  | -13.6913 | -0.4899 | C | -3.4665 | -10.4722 | 8.4267  | H  | 8.7472  | -9.1469  | -0.2894 |
| H  | -5.8599  | -13.7269 | -6.8091 | C | -2.9273 | -11.6736 | 8.9737  | H  | 9.5344  | -10.9897 | 1.1596  |
| H  | -8.2736  | -13.6402 | -7.6509 | C | -3.8094 | -12.6524 | 9.4572  | H  | 10.7261 | -16.4729 | 4.0053  |
| H  | -10.1158 | -13.5834 | -6.0024 | C | -5.1903 | -12.4482 | 9.3974  | H  | 11.2068 | -14.0655 | 4.4109  |
| C  | -3.8789  | -9.1238  | -4.5389 | C | -5.709  | -11.272  | 8.8576  | H  | 10.4135 | -12.3412 | 2.8069  |
| C  | -4.6149  | -9.4799  | -3.4788 | C | -4.8507 | -10.2854 | 8.3735  | H  | 7.6675  | -16.9473 | -0.9916 |
| C  | -4.9096  | -10.9057 | -3.257  | N | -1.6404 | -11.829  | 9.0091  | H  | 8.4031  | -18.8584 | 0.5412  |
| N  | -4.4813  | -11.8164 | -4.0432 | C | -1.109  | -12.889  | 9.4922  | H  | 9.6895  | -18.3277 | 2.5851  |
| C  | -3.787   | -11.5176 | -5.0897 | C | -1.9162 | -13.9963 | 10.0359 | Zn | 8.0851  | -13.8382 | -0.8145 |
| C  | -3.4694  | -10.2511 | -5.4035 | C | -3.2426 | -13.888  | 10.0226 | C  | 7.3126  | -7.8348  | -2.3971 |
| C  | -3.3101  | -12.652  | -5.9422 | H | 2.0935  | -6.4594  | 6.1667  | C  | 7.5511  | -6.9103  | -1.3722 |

---

---

|    |         |          |          |    |         |          |         |   |         |          |         |
|----|---------|----------|----------|----|---------|----------|---------|---|---------|----------|---------|
| N  | -3.6123 | -13.8302 | -5.5502  | H  | 1.762   | -8.6459  | 7.3769  | C | 7.257   | -5.5486  | -1.5147 |
| C  | -3.4142 | -15.0368 | -5.9324  | H  | -2.2447 | -6.1345  | 6.2445  | C | 6.718   | -5.1213  | -2.7333 |
| C  | -3.9642 | -16.0732 | -5.1222  | H  | -3.6154 | -7.9378  | 7.2215  | C | 6.4561  | -6.0059  | -3.7854 |
| C  | -3.7671 | -17.4087 | -5.5065  | H  | -5.8778 | -13.2213 | 9.7784  | C | 6.7699  | -7.3566  | -3.5968 |
| C  | -3.0416 | -17.71   | -6.662   | H  | -6.8009 | -11.1219 | 8.8134  | H | 6.4426  | -4.0669  | -2.8477 |
| C  | -2.5048 | -16.6902 | -7.4466  | H  | -5.274  | -9.3619  | 7.9498  | H | 6.5332  | -8.0681  | -4.3965 |
| C  | -2.6898 | -15.3565 | -7.0842  | H  | -0.0114 | -12.9777 | 9.5042  | H | 7.9311  | -7.2732  | -0.4101 |
| N  | -4.6286 | -15.7549 | -4.0551  | H  | -1.4226 | -14.8926 | 10.4447 | C | -1.8563 | -6.1594  | -5.8428 |
| C  | -5.1424 | -16.6496 | -3.2969  | H  | -3.8868 | -14.6898 | 10.4192 | C | -2.4132 | -5.1217  | -5.0866 |
| C  | -5.0141 | -18.0905 | -3.5815  | Zn | -0.8056 | -10.2164 | 8.2324  | C | -3.4563 | -5.337   | -4.1772 |
| C  | -4.3404 | -18.4715 | -4.6643  | C  | -2.1945 | -2.7664  | 2.9397  | C | -3.951  | -6.6406  | -4.0479 |
| H  | -4.9795 | -8.7565  | -2.7364  | C  | -3.2863 | -3.5314  | 2.8193  | C | -3.4287 | -7.7126  | -4.7822 |
| H  | -5.4906 | -11.1958 | -2.3676  | C  | -4.3841 | -3.0822  | 1.9485  | C | -2.3873 | -7.4441  | -5.6784 |
| H  | -2.867  | -10.0743 | -6.305   | N  | -4.3254 | -1.9853  | 1.2985  | H | -4.7362 | -6.8364  | -3.3088 |
| H  | -2.7134 | -12.4749 | -6.8498  | C  | -3.3006 | -1.2059  | 1.3955  | H | -1.9372 | -8.2774  | -6.2294 |
| H  | -2.8898 | -18.7611 | -6.9578  | C  | -2.2442 | -1.5035  | 2.1715  | H | -1.9804 | -4.1186  | -5.1712 |
| H  | -1.9322 | -16.9392 | -8.356   | C  | -3.3188 | 0.0482   | 0.5771  | C | 0.0809  | -4.7921  | 5.2485  |
| H  | -2.2598 | -14.5615 | -7.7125  | N  | -4.3418 | 0.2338   | -0.1675 | C | 1.3023  | -4.1467  | 5.0218  |
| H  | -5.7005 | -16.3341 | -2.4015  | C  | -4.7614 | 1.1079   | -1.0054 | C | 1.4151  | -3.0453  | 4.164   |
| H  | -5.4708 | -18.8313 | -2.9057  | C  | -6.0226 | 0.8627   | -1.6246 | C | 0.2526  | -2.5857  | 3.5309  |
| H  | -4.2186 | -19.5375 | -4.9175  | C  | -6.5168 | 1.7964   | -2.5488 | C | -0.9909 | -3.1986  | 3.7247  |
| Zn | -4.6515 | -13.7852 | -3.9108  | C  | -5.779  | 2.9426   | -2.8551 | C | -1.0511 | -4.2934  | 4.5948  |
| C  | 5.7597  | -5.5452  | -5.0316  | C  | -4.5452 | 3.173    | -2.2479 | H | 0.3249  | -1.7532  | 2.821   |
| C  | 5.1172  | -4.3734  | -5.1063  | C  | -4.0365 | 2.2595   | -1.3252 | H | -2.007  | -4.8119  | 4.7287  |
| C  | 4.3722  | -4.0414  | -6.3315  | N  | -6.6774 | -0.2135  | -1.3183 | H | 2.2088  | -4.5487  | 5.4891  |
| N  | 4.3148  | -4.8407  | -7.3251  | C  | -7.8142 | -0.4773  | -1.8447 | C | 2.1699  | -13.6069 | 1.2001  |
| C  | 4.9314  | -5.9749  | -7.3052  | C  | -8.4518 | 0.4165   | -2.8286 | C | 1.7259  | -13.1628 | 2.4512  |
| C  | 5.6558  | -6.3793  | -6.2481  | C  | -7.8212 | 1.5347   | -3.1797 | C | 0.37    | -12.9469 | 2.728   |
| C  | 4.7853  | -6.8523  | -8.5097  | H  | -3.3901 | -4.5072  | 3.3133  | C | -0.5546 | -13.1942 | 1.7048  |
| N  | 4.0438  | -6.4125  | -9.4538  | H  | -5.2687 | -3.7278  | 1.8338  | C | -0.1591 | -13.6378 | 0.4375  |
| C  | 3.6379  | -6.8055  | -10.6039 | H  | -1.4011 | -0.7994  | 2.2024  | C | 1.2065  | -13.8476 | 0.2143  |
| C  | 2.7704  | -5.9299  | -11.3211 | H  | -2.4822 | 0.7626   | 0.6063  | H | -1.6163 | -12.9852 | 1.8815  |
| C  | 2.3031  | -6.3246  | -12.5844 | H  | -6.1723 | 3.6717   | -3.5825 | H | 1.5375  | -14.1598 | -0.7826 |
| C  | 2.6815  | -7.5574  | -13.122  | H  | -3.9704 | 4.0805   | -2.4985 | H | 2.4671  | -12.926  | 3.2231  |

---

**Table S14.** Cartesian coordinates (in Å) for the PM7 model of Zn<sup>II</sup>L<sub>6</sub> (**A** and **B** as subcomponents).

|   |         |         |         |   |          |          |         |   |          |         |         |
|---|---------|---------|---------|---|----------|----------|---------|---|----------|---------|---------|
| C | -3.6097 | -2.2519 | 15.3505 | C | -1.9795  | -12.4438 | 15.6916 | C | -12.5215 | -0.5982 | 19.7547 |
| C | -4.5882 | -3.1331 | 15.1349 | C | -0.9612  | -12.4715 | 16.6504 | C | -12.3276 | -0.5139 | 18.4323 |
| C | -4.44   | -4.0881 | 14.024  | C | -0.1401  | -11.3638 | 16.887  | C | -11.7084 | 0.7006  | 17.8725 |
| N | -3.4099 | -4.0897 | 13.2659 | C | -0.3513  | -10.1924 | 16.153  | N | -11.3489 | 1.6811  | 18.6084 |
| C | -2.4396 | -3.2559 | 13.4511 | C | -1.3624  | -10.1217 | 15.1895 | C | -11.5295 | 1.6483  | 19.8861 |
| C | -2.4552 | -2.345  | 14.4383 | C | -2.1434  | -11.2604 | 14.9622 | C | -12.0868 | 0.5975  | 20.5077 |
| C | -1.2856 | -3.328  | 12.5016 | H | 0.2636   | -9.3055  | 16.3698 | C | -11.0769 | 2.8363  | 20.6747 |
| N | -1.36   | -4.2053 | 11.5753 | H | -2.909   | -11.2111 | 14.1788 | N | -10.534  | 3.7867  | 20.0166 |
| C | -0.6484 | -4.603  | 10.5866 | H | -0.7847  | -13.3809 | 17.2398 | C | -10.0152 | 4.9317  | 20.2618 |
| C | -1.1769 | -5.6608 | 9.789   | C | -9.5838  | -11.5865 | 28.3126 | C | -9.5057  | 5.6644  | 19.15   |
| C | -0.4263 | -6.1241 | 8.6972  | C | -8.6514  | -12.4091 | 27.8249 | C | -8.9253  | 6.9219  | 19.3785 |
| C | 0.8153  | -5.5552 | 8.4025  | C | -9.047   | -13.7786 | 27.4528 | C | -8.8507  | 7.4395  | 20.6743 |
| C | 1.3231  | -4.5201 | 9.1861  | N | -10.249  | -14.1971 | 27.58   | C | -9.3508  | 6.7152  | 21.7556 |
| C | 0.5946  | -4.0441 | 10.2756 | C | -11.1754 | -13.4329 | 28.0536 | C | -9.9326  | 5.4648  | 21.5514 |
| N | -2.3332 | -6.1638 | 10.0918 | C | -10.9343 | -12.1698 | 28.4348 | N | -9.59    | 5.15    | 17.9624 |
| C | -2.8492 | -7.1133 | 9.4051  | C | -12.5545 | -14.0047 | 28.1549 | C | -9.1468  | 5.7706  | 16.9339 |
| C | -2.1702 | -7.6958 | 8.2332  | N | -12.7054 | -15.2077 | 27.753  | C | -8.5144  | 7.0991  | 17.0283 |
| C | -0.9803 | -7.2158 | 7.8794  | C | -13.6553 | -16.061  | 27.6484 | C | -8.4013  | 7.6711  | 18.2247 |
| H | -5.4925 | -3.1593 | 15.7624 | C | -13.324  | -17.3398 | 27.1107 | H | -12.5963 | -1.3221 | 17.7383 |
| H | -5.2496 | -4.81   | 13.8343 | C | -14.3382 | -18.3013 | 26.9796 | H | -11.539  | 0.7576  | 16.7858 |
| H | -1.6164 | -1.6408 | 14.548  | C | -15.6467 | -18.0035 | 27.3692 | H | -12.1958 | 0.6441  | 21.5993 |
| H | -0.4228 | -2.6514 | 12.5969 | C | -15.9614 | -16.7505 | 27.8935 | H | -11.1995 | 2.8793  | 21.7675 |
| H | 1.3998  | -5.925  | 7.5441  | C | -14.9696 | -15.7807 | 28.033  | H | -8.393   | 8.4275  | 20.8469 |
| H | 2.3037  | -4.0768 | 8.9431  | N | -12.0988 | -17.5793 | 26.7591 | H | -9.2856  | 7.1327  | 22.7747 |
| H | 1.0079  | -3.2266 | 10.8858 | C | -11.7529 | -18.7121 | 26.2729 | H | -10.3231 | 4.9039  | 22.4142 |
| H | -3.8338 | -7.5098 | 9.699   | C | -12.7152 | -19.8124 | 26.0804 | H | -9.24    | 5.2972  | 15.944  |
| H | -2.6452 | -8.5129 | 7.667   | C | -13.9862 | -19.6188 | 26.4244 | H | -8.1447  | 7.6023  | 16.1206 |
| H | -0.4345 | -7.6201 | 7.0111  | H | -7.6094  | -12.089  | 27.6736 | H | -7.9346  | 8.6626  | 18.3443 |
| C | -1.6321 | -8.8781 | 14.4076 | H | -8.2843  | -14.4572 | 27.0403 | C | -6.2661  | 1.1719  | 17.8528 |
| C | -0.7049 | -7.9534 | 14.1407 | H | -11.7605 | -11.5687 | 28.842  | C | -6.644   | 1.592   | 19.0632 |
| C | -1.0844 | -6.7875 | 13.3197 | H | -13.3937 | -13.4112 | 28.5489 | C | -7.9349  | 2.2873  | 19.1973 |
| N | -2.2673 | -6.6352 | 12.8552 | H | -16.439  | -18.7627 | 27.2626 | N | -8.6978  | 2.497   | 18.1934 |
| C | -3.1906 | -7.5039 | 13.1034 | H | -16.9974 | -16.5263 | 28.199  | C | -8.366   | 2.1057  | 17.0073 |
| C | -2.9687 | -8.5964 | 13.8485 | H | -15.2323 | -14.7954 | 28.4477 | C | -7.2135  | 1.4625  | 16.7601 |
| C | -4.5422 | -7.2656 | 12.5089 | H | -10.7008 | -18.8716 | 25.9896 | C | -9.3263  | 2.3949  | 15.8967 |
| N | -4.6715 | -6.2221 | 11.7855 | H | -12.3797 | -20.7739 | 25.6595 | N | -10.4036 | 3.0038  | 16.2157 |
| C | -5.5947 | -5.6518 | 11.1052 | H | -14.7408 | -20.4125 | 26.2988 | C | -11.4575 | 3.4343  | 15.6283 |
| C | -5.251  | -4.4442 | 10.4297 | C | -11.166  | -14.689  | 22.5282 | C | -12.4362 | 4.0788  | 16.4407 |
| C | -6.2359 | -3.7907 | 9.6725  | C | -12.2208 | -14.3438 | 23.2742 | C | -13.6048 | 4.5649  | 15.834  |
| C | -7.5273 | -4.3178 | 9.5876  | C | -12.2329 | -14.716  | 24.7011 | C | -13.7985 | 4.4177  | 14.458  |
| C | -7.8537 | -5.4995 | 10.2514 | N | -11.2737 | -15.3643 | 25.2449 | C | -12.8365 | 3.7854  | 13.6716 |
| C | -6.891  | -6.1657 | 11.0085 | C | -10.2462 | -15.7284 | 24.5535 | C | -11.6686 | 3.2942  | 14.2537 |
| N | -4.0423 | -3.9847 | 10.5327 | C | -10.1185 | -15.4377 | 23.2514 | N | -12.2206 | 4.1984  | 17.7139 |

---

|    |         |          |         |    |          |          |         |    |          |         |         |
|----|---------|----------|---------|----|----------|----------|---------|----|----------|---------|---------|
| C  | -3.6877 | -2.905   | 9.9427  | C  | -9.174   | -16.4968 | 25.2593 | C  | -13.0692 | 4.7697  | 18.4838 |
| C  | -4.62   | -2.1173  | 9.1153  | N  | -9.356   | -16.7206 | 26.5029 | C  | -14.3388 | 5.3252  | 17.9807 |
| C  | -5.8727 | -2.545   | 8.9777  | C  | -8.736   | -17.301  | 27.4617 | C  | -14.6092 | 5.229   | 16.681  |
| H  | 0.3332  | -8.0517  | 14.4925 | C  | -9.3561  | -17.2747 | 28.7452 | H  | -6.0302  | 1.4175  | 19.96   |
| H  | -0.317  | -6.0342  | 13.0825 | C  | -8.7059  | -17.8969 | 29.8225 | H  | -8.2522  | 2.6304  | 20.1942 |
| H  | -3.8021 | -9.2896  | 14.0313 | C  | -7.4746  | -18.5299 | 29.6329 | H  | -6.9737  | 1.1576  | 15.7305 |
| H  | -5.3752 | -7.9641  | 12.6806 | C  | -6.8754  | -18.5499 | 28.3743 | H  | -9.1105  | 2.0928  | 14.8606 |
| H  | -8.2961 | -3.7989  | 8.9917  | C  | -7.5024  | -17.9359 | 27.2907 | H  | -14.7181 | 4.8029  | 13.9875 |
| H  | -8.8756 | -5.9081  | 10.1774 | N  | -10.4987 | -16.6765 | 28.8824 | H  | -12.9996 | 3.6742  | 12.5863 |
| H  | -7.1634 | -7.0973  | 11.5279 | C  | -11.0932 | -16.6267 | 30.0153 | H  | -10.9169 | 2.7984  | 13.6206 |
| H  | -2.6514 | -2.5505  | 10.0559 | C  | -10.5245 | -17.2382 | 31.2305 | H  | -12.8442 | 4.8511  | 19.5587 |
| H  | -4.2785 | -1.1927  | 8.6229  | C  | -9.3531  | -17.8642 | 31.1442 | H  | -15.0446 | 5.8102  | 18.674  |
| H  | -6.6046 | -1.9897  | 8.3686  | H  | -13.0765 | -13.7896 | 22.8618 | H  | -15.5453 | 5.6302  | 16.2595 |
| Zn | -3.0137 | -5.2168  | 11.6854 | H  | -13.0955 | -14.4221 | 25.319  | Zn | -10.4661 | 3.3861  | 18.1183 |
| C  | -4.9851 | 0.4484   | 17.6234 | H  | -9.2016  | -15.755  | 22.7361 | C  | -13.8199 | -3.0181 | 23.9651 |
| C  | -3.8546 | 0.7333   | 18.3948 | H  | -8.2742  | -16.8445 | 24.7297 | C  | -12.9308 | -2.4129 | 24.7568 |
| C  | -2.6468 | 0.0445   | 18.2247 | H  | -6.9705  | -19.0177 | 30.4834 | C  | -13.1096 | -2.5037 | 26.2154 |
| C  | -2.5854 | -0.929   | 17.2183 | H  | -5.9034  | -19.0526 | 28.2357 | N  | -14.087  | -3.14   | 26.7388 |
| C  | -3.6923 | -1.2198  | 16.4161 | H  | -7.0181  | -17.9593 | 26.3024 | C  | -14.9708 | -3.7318 | 26.0046 |
| C  | -4.8881 | -0.5321  | 16.635  | H  | -12.0631 | -16.1103 | 30.0865 | C  | -14.9138 | -3.7195 | 24.6629 |
| H  | -1.6664 | -1.5123  | 17.0625 | H  | -11.0665 | -17.1752 | 32.1879 | C  | -16.0764 | -4.4515 | 26.7107 |
| H  | -5.7667 | -0.7702  | 16.0162 | H  | -8.8899  | -18.3375 | 32.0256 | N  | -16.0485 | -4.4315 | 27.9881 |
| H  | -3.9279 | 1.5306   | 19.1466 | Zn | -11.0303 | -15.9577 | 27.1203 | C  | -16.7454 | -4.8946 | 28.9583 |
| C  | 2.5598  | -7.8184  | 23.4376 | C  | -6.4564  | -8.0168  | 30.0225 | C  | -16.2918 | -4.6068 | 30.2794 |
| C  | 3.2268  | -7.498   | 22.321  | C  | -6.0552  | -6.7407  | 30.061  | C  | -17.0264 | -5.1005 | 31.3689 |
| C  | 3.8626  | -8.563   | 21.531  | C  | -4.7226  | -6.426   | 30.6063 | C  | -18.1794 | -5.8604 | 31.1558 |
| N  | 3.8025  | -9.7881  | 21.8798 | N  | -3.9309  | -7.3343  | 31.0324 | C  | -18.6146 | -6.138  | 29.8607 |
| C  | 3.1807  | -10.1474 | 22.9525 | C  | -4.2704  | -8.5802  | 30.9907 | C  | -17.9007 | -5.657  | 28.7639 |
| C  | 2.5584  | -9.2637  | 23.752  | C  | -5.4622  | -8.9871  | 30.5244 | N  | -15.2151 | -3.9014 | 30.438  |
| C  | 3.1788  | -11.6086 | 23.2792 | C  | -3.2771  | -9.5792  | 31.495  | C  | -14.7688 | -3.618  | 31.6043 |
| N  | 3.7896  | -12.3801 | 22.4625 | N  | -2.1752  | -9.1143  | 31.9437 | C  | -15.4412 | -4.0711 | 32.8357 |
| C  | 4.0358  | -13.6318 | 22.3434 | C  | -1.0926  | -9.5721  | 32.453  | C  | -16.5501 | -4.7993 | 32.7289 |
| C  | 4.7868  | -14.0413 | 21.2024 | C  | -0.1056  | -8.6202  | 32.8434 | H  | -12.0633 | -1.87   | 24.3514 |
| C  | 5.0775  | -15.4046 | 21.0383 | C  | 1.093    | -9.0818  | 33.4094 | H  | -12.3723 | -2.0159 | 26.8717 |
| C  | 4.6364  | -16.3379 | 21.9802 | C  | 1.3091   | -10.4513 | 33.583  | H  | -15.6931 | -4.2339 | 24.0806 |
| C  | 3.9023  | -15.9281 | 23.0924 | C  | 0.3379   | -11.3751 | 33.1994 | H  | -16.8656 | -4.9768 | 26.1517 |
| C  | 3.6005  | -14.5792 | 23.274  | C  | -0.861   | -10.9382 | 32.6374 | H  | -18.7511 | -6.246  | 32.0159 |
| N  | 5.1805  | -13.1462 | 20.3506 | N  | -0.3432  | -7.3574  | 32.6693 | H  | -19.5252 | -6.7407 | 29.7038 |
| C  | 5.8578  | -13.4654 | 19.3119 | C  | 0.5099   | -6.4649  | 33.0087 | H  | -18.2551 | -5.8849 | 27.747  |
| C  | 6.2329  | -14.86   | 19.015  | C  | 1.8099   | -6.8082  | 33.6134 | H  | -13.8511 | -3.0155 | 31.6924 |
| C  | 5.8538  | -15.818  | 19.8578 | C  | 2.1044   | -8.0908  | 33.8124 | H  | -15.027  | -3.8076 | 33.8221 |
| H  | 3.3299  | -6.4682  | 21.9541 | H  | -6.685   | -5.9135  | 29.703  | H  | -17.0865 | -5.1607 | 33.6216 |
| H  | 4.4052  | -8.2913  | 20.6122 | H  | -4.4028  | -5.3733  | 30.6546 | C  | -11.2593 | -6.897  | 28.8755 |
| H  | 2.0438  | -9.6407  | 24.6462 | H  | -5.695   | -10.0611 | 30.5426 | C  | -12.4849 | -7.2352 | 28.4542 |
| H  | 2.6749  | -11.9929 | 24.179  | H  | -3.4929  | -10.6584 | 31.4825 | C  | -13.5283 | -6.2017 | 28.3723 |
| H  | 4.8692  | -17.4074 | 21.846  | H  | 2.2529   | -10.8072 | 34.0281 | N  | -13.3028 | -4.988  | 28.6942 |
| H  | 3.5599  | -16.6726 | 23.831  | H  | 0.518    | -12.4539 | 33.3429 | C  | -12.1409 | -4.614  | 29.1138 |

---

---

|    |         |          |         |    |          |          |         |    |          |          |         |
|----|---------|----------|---------|----|----------|----------|---------|----|----------|----------|---------|
| H  | 3.0207  | -14.2696 | 24.1569 | H  | -1.6196  | -11.6787 | 32.341  | C  | -11.1103 | -5.4685  | 29.2287 |
| H  | 6.1746  | -12.672  | 18.617  | H  | 0.2665   | -5.4038  | 32.8435 | C  | -11.9781 | -3.1689  | 29.4701 |
| H  | 6.8179  | -15.0962 | 18.1115 | H  | 2.5189   | -6.0119  | 33.8919 | N  | -13.0047 | -2.4215  | 29.3204 |
| H  | 6.1128  | -16.8743 | 19.6782 | H  | 3.064    | -8.3954  | 34.2613 | C  | -13.3139 | -1.189   | 29.4851 |
| C  | 0.9195  | -11.4314 | 17.9293 | C  | -0.0721  | -6.5348  | 27.5857 | C  | -14.6473 | -0.804   | 29.1568 |
| C  | 0.7317  | -12.0613 | 19.0915 | C  | -0.3158  | -7.7985  | 27.9558 | C  | -15.0246 | 0.5377   | 29.3227 |
| C  | 1.8313  | -12.077  | 20.0703 | C  | -0.9594  | -8.0544  | 29.2578 | C  | -14.1047 | 1.4747   | 29.8002 |
| N  | 2.9537  | -11.5118 | 19.8355 | N  | -1.3042  | -7.1081  | 30.0447 | C  | -12.8028 | 1.0901   | 30.1173 |
| C  | 3.1747  | -10.8978 | 18.7194 | C  | -1.1067  | -5.8748  | 29.7163 | C  | -12.4065 | -0.2377  | 29.9603 |
| C  | 2.2463  | -10.8122 | 17.7513 | C  | -0.5229  | -5.5203  | 28.561  | N  | -15.4727 | -1.7009  | 28.7146 |
| C  | 4.5227  | -10.2726 | 18.5392 | C  | -1.5508  | -4.8247  | 30.6849 | C  | -16.6799 | -1.4048  | 28.4078 |
| N  | 5.3436  | -10.389  | 19.5121 | N  | -2.0777  | -5.2365  | 31.7724 | C  | -17.2101 | -0.035   | 28.5338 |
| C  | 6.5408  | -10.0264 | 19.7908 | C  | -2.5726  | -4.7233  | 32.8365 | C  | -16.4039 | 0.9245   | 28.9821 |
| C  | 7.0509  | -10.3976 | 21.0701 | C  | -3.0408  | -5.6266  | 33.8349 | H  | -12.7591 | -8.2562  | 28.1574 |
| C  | 8.3567  | -10.0147 | 21.4151 | C  | -3.5862  | -5.1034  | 35.0178 | H  | -14.5314 | -6.4862  | 28.0182 |
| C  | 9.1372  | -9.2821  | 20.5172 | C  | -3.6671  | -3.7211  | 35.2056 | H  | -10.1484 | -5.0781  | 29.5872 |
| C  | 8.6308  | -8.9232  | 19.2687 | C  | -3.2061  | -2.8451  | 34.2239 | H  | -11.0185 | -2.775   | 29.8376 |
| C  | 7.3364  | -9.2934  | 18.9052 | C  | -2.6579  | -3.3433  | 33.0427 | H  | -14.4077 | 2.527    | 29.9274 |
| N  | 6.2961  | -11.0744 | 21.8789 | N  | -2.9463  | -6.9029  | 33.6253 | H  | -12.0848 | 1.8383   | 30.4933 |
| C  | 6.7095  | -11.43   | 23.0374 | C  | -3.3486  | -7.7529  | 34.4944 | H  | -11.3755 | -0.5273  | 30.2148 |
| C  | 8.0594  | -11.0968 | 23.5283 | C  | -3.9427  | -7.343   | 35.78   | H  | -17.3465 | -2.1996  | 28.0385 |
| C  | 8.8742  | -10.4022 | 22.7377 | C  | -4.0639  | -6.0442  | 36.0443 | H  | -18.2554 | 0.1814   | 28.2605 |
| H  | -0.2237 | -12.5484 | 19.3408 | H  | -0.0503  | -8.6605  | 27.3277 | H  | -16.7563 | 1.9628   | 29.0938 |
| H  | 1.6762  | -12.5874 | 21.0335 | H  | -1.1414  | -9.0959  | 29.5658 | Zn | -14.5218 | -3.4304  | 28.6491 |
| H  | 2.4794  | -10.2836 | 16.8144 | H  | -0.3724  | -4.4501  | 28.3655 | C  | -13.7139 | -2.9924  | 22.4807 |
| H  | 4.7848  | -9.7348  | 17.6157 | H  | -1.4221  | -3.7535  | 30.4678 | C  | -13.2182 | -1.863   | 21.8242 |
| H  | 10.1616 | -8.9837  | 20.7958 | H  | -4.0967  | -3.3167  | 36.1369 | C  | -13.0918 | -1.8123  | 20.431  |
| H  | 9.2564  | -8.3446  | 18.5679 | H  | -3.2733  | -1.7555  | 34.383  | C  | -13.5019 | -2.9381  | 19.7031 |
| H  | 6.9499  | -9.002   | 17.9168 | H  | -2.2955  | -2.6403  | 32.2772 | C  | -13.9878 | -4.0954  | 20.3259 |
| H  | 6.0344  | -12.0044 | 23.691  | H  | -3.2487  | -8.8275  | 34.2756 | C  | -14.0838 | -4.1043  | 21.7213 |
| H  | 8.3792  | -11.4207 | 24.5319 | H  | -4.278   | -8.1043  | 36.5026 | H  | -13.4464 | -2.9202  | 18.6079 |
| H  | 9.892   | -10.1302 | 23.0614 | H  | -4.5018  | -5.6909  | 36.9922 | H  | -14.4243 | -5.0109  | 22.2427 |
| Zn | 4.561   | -11.3821 | 20.9863 | Zn | -2.13    | -7.1757  | 31.8468 | H  | -12.9306 | -0.9987  | 22.4367 |
| C  | 1.3083  | -3.032   | 24.2235 | C  | -7.8058  | -8.4365  | 29.5235 | C  | -9.8484  | -14.6722 | 18.9576 |
| C  | 0.3885  | -2.1236  | 24.5607 | C  | -8.8667  | -7.5217  | 29.4458 | C  | -10.6157 | -13.652  | 18.3907 |
| C  | 0.5204  | -0.7557  | 24.0293 | C  | -10.1351 | -7.8875  | 28.9755 | C  | -11.5903 | -12.9799 | 19.1358 |
| N  | 1.4808  | -0.4168  | 23.2559 | C  | -10.3227 | -9.2208  | 28.597  | C  | -11.7758 | -13.3234 | 20.4793 |
| C  | 2.3913  | -1.265   | 22.9122 | C  | -9.3074  | -10.1734 | 28.6979 | C  | -11.0177 | -14.3354 | 21.0823 |
| C  | 2.3842  | -2.5352  | 23.3428 | C  | -8.0501  | -9.7633  | 29.1481 | C  | -10.0841 | -15.0139 | 20.2916 |
| C  | 3.4673  | -0.7838  | 21.9904 | H  | -11.2899 | -9.5452  | 28.1943 | H  | -12.5104 | -12.7557 | 21.0696 |
| N  | 3.3901  | 0.4324   | 21.6073 | H  | -7.2444  | -10.5073 | 29.2131 | H  | -9.5189  | -15.8504 | 20.723  |
| C  | 4.046   | 1.232    | 20.8513 | H  | -8.6971  | -6.4894  | 29.7747 | H  | -10.4537 | -13.3686 | 17.3397 |
| C  | 3.5455  | 2.5612   | 20.7221 | C  | -14.3853 | -5.2888  | 19.5162 | C  | -8.7971  | -15.3828 | 18.1745 |
| C  | 4.2352  | 3.4658   | 19.8996 | C  | -15.2332 | -6.221   | 19.9636 | C  | -7.7098  | -15.9011 | 18.7538 |
| C  | 5.3902  | 3.0645   | 19.2231 | C  | -15.5794 | -7.351   | 19.0836 | C  | -6.7109  | -16.5775 | 17.9109 |
| C  | 5.8718  | 1.7628   | 19.3552 | N  | -15.0994 | -7.4649  | 17.9045 | N  | -6.8524  | -16.6764 | 16.6455 |
| C  | 5.2026  | 0.8477   | 20.1669 | C  | -14.2769 | -6.5862  | 17.4354 | C  | -7.8878  | -16.1866 | 16.0464 |

---

---

|    |         |         |         |   |          |          |         |   |         |          |         |
|----|---------|---------|---------|---|----------|----------|---------|---|---------|----------|---------|
| N  | 2.4699  | 2.8969  | 21.3646 | C | -13.8777 | -5.5209  | 18.1488 | C | -8.8694 | -15.5532 | 16.7105 |
| C  | 1.983   | 4.0779  | 21.2795 | C | -13.785  | -6.7855  | 16.0366 | C | -7.9538 | -16.3429 | 14.5596 |
| C  | 2.605   | 5.1278  | 20.4521 | N | -14.2316 | -7.8073  | 15.4135 | N | -6.9721 | -16.943  | 14.0026 |
| C  | 3.7107  | 4.8353  | 19.7713 | C | -14.1009 | -8.3423  | 14.2569 | C | -6.6169 | -17.2783 | 12.8186 |
| H  | -0.4716 | -2.3694 | 25.2013 | C | -14.8375 | -9.5378  | 14.0075 | C | -5.3743 | -17.9646 | 12.6837 |
| H  | -0.2421 | -0.0074 | 24.2959 | C | -14.7214 | -10.1538 | 12.7516 | C | -4.9488 | -18.3462 | 11.4019 |
| H  | 3.1952  | -3.2071 | 23.0264 | C | -13.8989 | -9.5991  | 11.7675 | C | -5.7325 | -18.055  | 10.2823 |
| H  | 4.2747  | -1.4519 | 21.6543 | C | -13.1832 | -8.4295  | 12.0198 | C | -6.9469 | -17.3852 | 10.4238 |
| H  | 5.9272  | 3.7799  | 18.5786 | C | -13.2826 | -7.8016  | 13.2608 | C | -7.3893 | -16.9967 | 11.6877 |
| H  | 6.7839  | 1.4561  | 18.8158 | N | -15.593  | -10.0216 | 14.9442 | N | -4.673  | -18.2154 | 13.7456 |
| H  | 5.5939  | -0.1768 | 20.2622 | C | -16.2746 | -11.0909 | 14.7668 | C | -3.5514 | -18.8292 | 13.6746 |
| H  | 1.0681  | 4.319   | 21.843  | C | -16.2464 | -11.8402 | 13.4975 | C | -2.9853 | -19.2874 | 12.3926 |
| H  | 2.1561  | 6.1328  | 20.4031 | C | -15.4861 | -11.3872 | 12.5035 | C | -3.6648 | -19.0538 | 11.2724 |
| H  | 4.2097  | 5.5877  | 19.1388 | H | -15.6984 | -6.163   | 20.9583 | H | -7.5275 | -15.8229 | 19.8358 |
| C  | -1.4764 | 0.3302  | 19.1148 | H | -16.2881 | -8.1107  | 19.4492 | H | -5.8121 | -17.0004 | 18.3861 |
| C  | -0.2383 | -0.1129 | 18.8676 | H | -13.1664 | -4.8159  | 17.6951 | H | -9.7341 | -15.162  | 16.1537 |
| C  | 0.8298  | 0.1753  | 19.841  | H | -13.084  | -6.077   | 15.5698 | H | -8.8042 | -15.9518 | 13.9804 |
| N  | 0.6133  | 0.8432  | 20.9088 | H | -13.8148 | -10.086  | 10.782  | H | -5.3915 | -18.3565 | 9.2783  |
| C  | -0.5609 | 1.3095  | 21.1733 | H | -12.5385 | -7.9988  | 11.2349 | H | -7.5594 | -17.1622 | 9.5335  |
| C  | -1.6124 | 1.1047  | 20.3658 | H | -12.7129 | -6.8781  | 13.446  | H | -8.3492 | -16.4666 | 11.784  |
| C  | -0.7217 | 2.0935  | 22.4379 | H | -16.9042 | -11.4642 | 15.5895 | H | -2.9894 | -19.0217 | 14.6019 |
| N  | 0.319   | 2.2237  | 23.1669 | H | -16.8473 | -12.7564 | 13.3819 | H | -2.0166 | -19.8126 | 12.3712 |
| C  | 0.6348  | 2.7748  | 24.2793 | H | -15.4335 | -11.9137 | 11.5364 | H | -3.2808 | -19.3774 | 10.2911 |
| C  | 1.9827  | 2.6243  | 24.7186 | C | -12.4064 | -11.9084 | 18.5038 | C | -2.8818 | -13.6232 | 15.4722 |
| C  | 2.3672  | 3.2101  | 25.9348 | C | -11.8826 | -11.007  | 17.6699 | C | -3.921  | -13.5957 | 14.6283 |
| C  | 1.4406  | 3.928   | 26.6953 | C | -12.7804 | -10.018  | 17.0486 | C | -4.7971 | -14.7742 | 14.5278 |
| C  | 0.1242  | 4.0689  | 26.2585 | N | -14.0384 | -10.0038 | 17.2806 | N | -4.5958 | -15.8273 | 15.2201 |
| C  | -0.2797 | 3.493   | 25.0547 | C | -14.5778 | -10.856  | 18.0899 | C | -3.5957 | -15.907  | 16.0332 |
| N  | 2.8135  | 1.95    | 23.9862 | C | -13.86   | -11.7974 | 18.7261 | C | -2.7278 | -14.8969 | 16.2067 |
| C  | 4.0334  | 1.7863  | 24.3392 | C | -16.0593 | -10.7723 | 18.2831 | C | -3.441  | -17.1798 | 16.8049 |
| C  | 4.5721  | 2.347   | 25.5919 | N | -16.6738 | -9.8708  | 17.6175 | N | -4.3251 | -18.0806 | 16.6064 |
| C  | 3.7607  | 3.0476  | 26.3808 | C | -17.8782 | -9.4599  | 17.4676 | C | -4.587  | -19.2596 | 17.0329 |
| H  | 0.0144  | -0.6941 | 17.9693 | C | -18.0875 | -8.3753  | 16.5654 | C | -5.7474 | -19.8975 | 16.5046 |
| H  | 1.8444  | -0.2056 | 19.6451 | C | -19.3937 | -7.8985  | 16.3725 | C | -6.0717 | -21.188  | 16.951  |
| H  | -2.5874 | 1.5079  | 20.671  | C | -20.4649 | -8.4794  | 17.056  | C | -5.268  | -21.8308 | 17.896  |
| H  | -1.6918 | 2.5271  | 22.7241 | C | -20.2511 | -9.5397  | 17.9355 | C | -4.1344 | -21.1999 | 18.4066 |
| H  | 1.7498  | 4.3879  | 27.6484 | C | -18.9622 | -10.0304 | 18.1412 | C | -3.7942 | -19.9173 | 17.978  |
| H  | -0.5991 | 4.6377  | 26.8669 | N | -17.0692 | -7.8612  | 15.948  | N | -6.4711 | -19.2686 | 15.6313 |
| H  | -1.322  | 3.6124  | 24.722  | C | -17.2077 | -6.8881  | 15.1276 | C | -7.5221 | -19.8001 | 15.1289 |
| H  | 4.7055  | 1.2082  | 23.6859 | C | -18.5221 | -6.2897  | 14.831  | C | -7.9786 | -21.1499 | 15.5071 |
| H  | 5.6281  | 2.1854  | 25.862  | C | -19.6002 | -6.7799  | 15.438  | C | -7.2727 | -21.8378 | 16.4015 |
| H  | 4.1193  | 3.4867  | 27.3263 | H | -10.8064 | -10.9909 | 17.4379 | H | -4.1705 | -12.7203 | 14.0139 |
| Zn | 1.848   | 1.3219  | 22.3815 | H | -12.3547 | -9.2816  | 16.3496 | H | -5.6616 | -14.7378 | 13.8464 |
| C  | 1.264   | -4.4521 | 24.6794 | H | -14.3645 | -12.5146 | 19.3916 | H | -1.9095 | -15.0343 | 16.9264 |
| C  | 0.6324  | -4.8288 | 25.8668 | H | -16.5875 | -11.4634 | 18.9577 | H | -2.6124 | -17.3213 | 17.5153 |
| C  | 0.6049  | -6.1623 | 26.2972 | H | -21.4879 | -8.0993  | 16.9006 | H | -5.5292 | -22.8445 | 18.2421 |
| C  | 1.2524  | -7.1215 | 25.502  | H | -21.1042 | -9.9919  | 18.4687 | H | -3.5062 | -21.7165 | 19.1519 |

---

---

|   |        |         |         |    |          |          |         |    |         |          |         |
|---|--------|---------|---------|----|----------|----------|---------|----|---------|----------|---------|
| C | 1.8792 | -6.7885 | 24.2929 | H  | -18.8088 | -10.8689 | 18.8378 | H  | -2.8968 | -19.4311 | 18.3905 |
| C | 1.8532 | -5.4467 | 23.8988 | H  | -16.3155 | -6.4833  | 14.6248 | H  | -8.1068 | -19.2306 | 14.3898 |
| H | 1.2772 | -8.1639 | 25.8414 | H  | -18.6025 | -5.4531  | 14.1187 | H  | -8.8895 | -21.5736 | 15.0538 |
| H | 2.2976 | -5.1493 | 22.9415 | H  | -20.6037 | -6.3655  | 15.2473 | H  | -7.5763 | -22.8499 | 16.7154 |
| H | 0.158  | -4.0471 | 26.4731 | Zn | -15.4502 | -8.8385  | 16.5188 | Zn | -5.648  | -17.5021 | 15.3081 |

---

**Table S15.** Cartesian coordinates (in Å) for the PM7 model of Zn<sup>II</sup><sub>9</sub>L<sub>6</sub> **2** (**A** and **C** as subcomponents).

|   |          |         |         |   |         |          |         |    |          |          |         |
|---|----------|---------|---------|---|---------|----------|---------|----|----------|----------|---------|
| C | -12.1919 | 0.0624  | 20.351  | C | 0.0412  | -15.6037 | 23.5304 | C  | -16.414  | -4.1242  | 12.7322 |
| C | -11.2434 | -0.3994 | 19.5222 | C | 1.1771  | -15.8679 | 22.7641 | C  | -17.1125 | -5.2324  | 12.2263 |
| C | -10.0613 | 0.4368  | 19.2479 | C | 1.1146  | -16.812  | 21.7377 | C  | -16.8222 | -5.7221  | 10.9523 |
| N | -9.937   | 1.6934  | 19.7932 | C | -0.0798 | -17.4812 | 21.4701 | C  | -15.8604 | -5.0826  | 10.1686 |
| C | -10.8939 | 2.1243  | 20.6901 | C | -1.2233 | -17.1996 | 22.2165 | C  | -15.1852 | -3.9646  | 10.6587 |
| C | -11.9791 | 1.3907  | 20.9713 | N | 0.0472  | -14.6513 | 24.5465 | C  | -15.4575 | -3.4871  | 11.9402 |
| C | -10.652  | 3.4617  | 21.271  | C | 1.24    | -14.0569 | 24.9325 | N  | -18.0416 | -5.8533  | 13.0563 |
| N | -9.5578  | 4.1576  | 20.8218 | C | 2.4527  | -14.3042 | 24.1195 | C  | -18.8357 | -6.8783  | 12.5622 |
| C | -8.7695  | 5.1689  | 21.3431 | C | 2.4195  | -15.1391 | 23.078  | C  | -18.5311 | -7.4294  | 11.222  |
| C | -7.5964  | 5.4446  | 20.6215 | H | -6.6352 | -12.2893 | 26.2894 | C  | -17.5608 | -6.9033  | 10.4705 |
| C | -6.6788  | 6.3764  | 21.1083 | H | -4.086  | -12.0711 | 26.0665 | H  | -16.7117 | -4.4481  | 20.0862 |
| C | -6.9512  | 7.0603  | 22.2943 | H | -6.2921 | -16.0928 | 24.2001 | H  | -17.7684 | -5.7455  | 18.1479 |
| C | -8.1297  | 6.8076  | 22.9969 | H | -3.9888 | -16.9814 | 23.4621 | H  | -15.125  | -1.6946  | 17.1047 |
| C | -9.0366  | 5.859   | 22.526  | H | 2.0103  | -17.0312 | 21.1339 | H  | -15.4952 | -2.1186  | 14.6129 |
| N | -7.3547  | 4.7154  | 19.4597 | H | -0.1231 | -18.2242 | 20.6562 | H  | -15.6317 | -5.4593  | 9.1584  |
| C | -6.2604  | 5.0212  | 18.6636 | H | -2.1682 | -17.7153 | 21.9797 | H  | -14.4256 | -3.4643  | 10.035  |
| C | -5.2629  | 5.9914  | 19.1699 | C | 1.4163  | -13.2602 | 26.2161 | H  | -14.9031 | -2.6152  | 12.3235 |
| C | -5.445   | 6.6137  | 20.3372 | H | 3.4064  | -13.8255 | 24.3988 | C  | -20.087  | -7.3947  | 13.2561 |
| H | -11.3219 | -1.3959 | 19.0581 | H | 3.3334  | -15.3251 | 22.4904 | H  | -19.1381 | -8.2579  | 10.8196 |
| H | -9.2611  | 0.0587  | 18.5943 | C | -1.7248 | -11.1107 | 21.1977 | H  | -17.3552 | -7.3133  | 9.4681  |
| H | -12.7378 | 1.7991  | 21.6577 | C | -2.0114 | -12.3851 | 20.8915 | Zn | -17.6876 | -5.2594  | 14.9381 |
| H | -11.3454 | 3.9402  | 21.9808 | C | -2.1179 | -13.3768 | 21.9777 | C  | -12.8352 | -12.8589 | 17.563  |
| H | -6.2336  | 7.8022  | 22.6809 | N | -1.8926 | -13.0261 | 23.2893 | C  | -13.689  | -12.7606 | 18.5935 |
| H | -8.3372  | 7.349   | 23.9351 | C | -1.6398 | -11.7023 | 23.5846 | C  | -14.0673 | -13.9772 | 19.3334 |
| H | -9.9525  | 5.6483  | 23.1022 | C | -1.5526 | -10.7698 | 22.6288 | N  | -13.5898 | -15.2134 | 18.9654 |
| C | -6.0771  | 4.5146  | 17.2413 | C | -1.4426 | -11.3988 | 25.0171 | C  | -12.6568 | -15.2832 | 17.9501 |
| H | -4.3766  | 6.2343  | 18.5598 | N | -1.4639 | -12.4514 | 25.8961 | C  | -12.2888 | -14.2005 | 17.2509 |
| H | -4.701   | 7.3441  | 20.6953 | C | -1.7501 | -12.5617 | 27.2461 | C  | -12.129  | -16.6365 | 17.6783 |
| C | -5.4242  | 0.7895  | 22.3118 | C | -1.9348 | -13.8732 | 27.7121 | N  | -12.6383 | -17.6754 | 18.4166 |
| C | -6.2654  | 1.6235  | 22.9428 | C | -2.3139 | -14.0984 | 29.0361 | C  | -12.173  | -18.9328 | 18.7608 |
| C | -7.2754  | 2.356   | 22.1573 | C | -2.4734 | -13.0163 | 29.9034 | C  | -12.9149 | -19.5973 | 19.7513 |
| N | -7.3499  | 2.2234  | 20.7901 | C | -2.2652 | -11.7142 | 29.4482 | C  | -12.4873 | -20.8367 | 20.2298 |
| C | -6.4923  | 1.3419  | 20.1647 | C | -1.908  | -11.485  | 28.12   | C  | -11.3408 | -21.4273 | 19.6956 |
| C | -5.5736  | 0.6458  | 20.845  | N | -1.7925 | -14.9171 | 26.8015 | C  | -10.6183 | -20.7797 | 18.6936 |
| C | -6.6484  | 1.2403  | 18.699  | C | -1.852  | -16.2315 | 27.2415 | C  | -11.0301 | -19.5315 | 18.2287 |
| N | -7.575   | 2.0567  | 18.1014 | C | -2.2748 | -16.4955 | 28.6359 | N  | -14.0401 | -18.9589 | 20.2687 |
| C | -8.3125  | 1.9528  | 16.9343 | C | -2.5216 | -15.4893 | 29.4781 | C  | -14.8544 | -19.6188 | 21.1785 |
| C | -9.3926  | 2.8435  | 16.8278 | H | -2.1603 | -12.7068 | 19.8483 | C  | -14.4087 | -20.925  | 21.7154 |
| C | -10.2564 | 2.7694  | 15.7344 | H | -2.3664 | -14.4226 | 21.7433 | C  | -13.2784 | -21.4914 | 21.2871 |
| C | -10.02   | 1.8303  | 14.7291 | H | -1.3477 | -9.7284  | 22.9226 | H  | -14.1033 | -11.7893 | 18.9082 |
| C | -8.9318  | 0.9623  | 14.8204 | H | -1.2144 | -10.3865 | 25.3871 | H  | -14.7517 | -13.9033 | 20.1912 |
| C | -8.0804  | 1.0192  | 15.9232 | H | -2.765  | -13.1878 | 30.9523 | H  | -11.5794 | -14.3204 | 16.4171 |
| N | -9.604   | 3.7422  | 17.8697 | H | -2.3961 | -10.8632 | 30.1374 | H  | -11.3949 | -16.843  | 16.8834 |



|    |          |         |         |    |          |          |         |    |          |          |         |
|----|----------|---------|---------|----|----------|----------|---------|----|----------|----------|---------|
| C  | -10.5826 | 4.7188  | 17.7534 | H  | -1.7683  | -10.4507 | 27.7654 | H  | -11.0025 | -22.4093 | 20.0644 |
| C  | -11.5261 | 4.6458  | 16.6144 | C  | -1.3912  | -17.4245 | 26.4184 | H  | -9.7128  | -21.2512 | 18.2763 |
| C  | -11.3922 | 3.7071  | 15.6743 | H  | -2.3485  | -17.5348 | 28.9981 | H  | -10.4403 | -19.0195 | 17.4509 |
| H  | -6.2141  | 1.7796  | 24.0321 | H  | -2.8205  | -15.7005 | 30.5179 | C  | -16.2414 | -19.1424 | 21.5812 |
| H  | -7.9778  | 3.0342  | 22.664  | Zn | -1.8524  | -14.1512 | 24.9488 | H  | -15.0344 | -21.457  | 22.4518 |
| H  | -4.9211  | -0.0486 | 20.2931 | C  | -10.8598 | -13.9601 | 28.0277 | H  | -12.9665 | -22.471  | 21.685  |
| H  | -6.0172  | 0.5871  | 18.0757 | C  | -12.1325 | -13.5346 | 28.0386 | C  | -11.0319 | -15.6735 | 23.3083 |
| H  | -10.6933 | 1.7721  | 13.8586 | C  | -12.78   | -13.2291 | 29.3261 | C  | -10.4502 | -16.3469 | 22.3016 |
| H  | -8.7515  | 0.2209  | 14.0241 | N  | -12.1124 | -13.397  | 30.5161 | C  | -11.278  | -16.853  | 21.1922 |
| H  | -7.2366  | 0.3137  | 15.9948 | C  | -10.7865 | -13.7803 | 30.4796 | N  | -12.6394 | -16.6658 | 21.1741 |
| C  | -10.676  | 5.9409  | 18.6542 | C  | -10.1634 | -14.0738 | 29.3302 | C  | -13.2219 | -15.9841 | 22.2215 |
| H  | -12.3249 | 5.4002  | 16.5159 | C  | -10.1166 | -13.8424 | 31.7951 | C  | -12.502  | -15.4927 | 23.2382 |
| H  | -12.0917 | 3.6749  | 14.8229 | N  | -10.8636 | -13.5345 | 32.9047 | C  | -14.6877 | -15.8243 | 22.1268 |
| Zn | -8.5601  | 3.1133  | 19.4622 | C  | -10.5324 | -13.0326 | 34.1523 | N  | -15.3201 | -16.3574 | 21.0306 |
| C  | -15.2275 | -2.1751 | 19.8778 | C  | -11.6075 | -12.5289 | 34.9027 | C  | -16.4777 | -15.97   | 20.374  |
| C  | -15.8034 | -2.0895 | 21.1508 | C  | -11.3764 | -11.9312 | 36.1425 | C  | -16.5944 | -16.4068 | 19.0444 |
| C  | -15.2021 | -1.3631 | 22.1868 | C  | -10.0771 | -11.8677 | 36.6486 | C  | -17.6815 | -16.0035 | 18.2673 |
| C  | -14.0068 | -0.6892 | 21.9071 | C  | -9.0118  | -12.3914 | 35.9165 | C  | -18.6728 | -15.1975 | 18.8289 |
| C  | -13.4291 | -0.7155 | 20.6355 | C  | -9.237   | -12.9705 | 34.6683 | C  | -18.5758 | -14.7899 | 20.159  |
| C  | -14.0416 | -1.4756 | 19.6362 | N  | -12.8827 | -12.5954 | 34.3475 | C  | -17.4795 | -15.1727 | 20.9307 |
| H  | -13.4886 | -0.1333 | 22.7013 | C  | -13.9861 | -12.2101 | 35.0959 | N  | -15.5716 | -17.1926 | 18.5212 |
| H  | -13.5827 | -1.5126 | 18.6372 | C  | -13.7629 | -11.5522 | 36.4035 | C  | -15.6989 | -17.7401 | 17.2519 |
| H  | -16.7664 | -2.5886 | 21.3269 | C  | -12.5291 | -11.3948 | 36.8884 | C  | -16.8297 | -17.3052 | 16.4006 |
| C  | -9.0651  | -4.2218 | 30.3017 | H  | -12.6988 | -13.3877 | 27.105  | C  | -17.7528 | -16.462  | 16.8683 |
| C  | -8.9834  | -2.8817 | 30.2413 | H  | -13.817  | -12.8629 | 29.3435 | H  | -9.3672  | -16.543  | 22.2815 |
| C  | -7.67    | -2.2249 | 30.3607 | H  | -9.114   | -14.4063 | 29.3622 | H  | -10.8074 | -17.4079 | 20.3671 |
| N  | -6.5225  | -2.9494 | 30.5761 | H  | -9.0637  | -14.1438 | 31.9139 | H  | -13.0289 | -14.9341 | 24.0262 |
| C  | -6.6213  | -4.3251 | 30.6247 | H  | -9.8892  | -11.4044 | 37.6309 | H  | -15.2788 | -15.3057 | 22.8981 |
| C  | -7.792   | -4.9622 | 30.4845 | H  | -7.9875  | -12.3385 | 36.3219 | H  | -19.5383 | -14.8835 | 18.223  |
| C  | -5.3544  | -5.0327 | 30.9043 | H  | -8.3847  | -13.3656 | 34.092  | H  | -19.3633 | -14.1551 | 20.5983 |
| N  | -4.2545  | -4.2607 | 31.1795 | C  | -15.4248 | -12.5266 | 34.7172 | H  | -17.4081 | -14.83   | 21.9757 |
| C  | -2.8895  | -4.4752 | 31.2397 | H  | -14.6265 | -11.2219 | 37.0051 | C  | -14.8215 | -18.8598 | 16.7131 |
| C  | -2.1114  | -3.3304 | 31.477  | H  | -12.3788 | -10.9174 | 37.8706 | H  | -16.9368 | -17.7132 | 15.3813 |
| C  | -0.7195  | -3.4306 | 31.511  | C  | -11.8468 | -8.3667  | 31.1391 | H  | -18.5988 | -16.1599 | 16.2294 |
| C  | -0.1084  | -4.6723 | 31.3271 | C  | -10.795  | -9.0534  | 31.6224 | Zn | -13.9788 | -17.0283 | 19.7281 |
| C  | -0.8824  | -5.8104 | 31.1014 | C  | -10.9724 | -10.4419 | 32.0856 | C  | -12.4581 | -11.6713 | 16.7444 |
| C  | -2.2721  | -5.7128 | 31.0543 | N  | -12.2006 | -11.0565 | 32.0594 | C  | -13.3811 | -10.6484 | 16.5087 |
| N  | -2.7655  | -2.1099 | 31.6407 | C  | -13.2596 | -10.3584 | 31.5201 | C  | -13.0742 | -9.5456  | 15.7034 |
| C  | -2.0406  | -0.9808 | 32.0003 | C  | -13.1404 | -9.0944  | 31.0929 | C  | -11.8028 | -9.5063  | 15.1143 |
| C  | -0.5618  | -1.0602 | 32.0189 | C  | -14.5265 | -11.1135 | 31.4296 | C  | -10.8346 | -10.4903 | 15.357  |
| C  | 0.0661   | -2.2096 | 31.7623 | N  | -14.5303 | -12.4129 | 31.8719 | C  | -11.1828 | -11.5637 | 16.1854 |
| H  | -9.8727  | -2.2468 | 30.1116 | C  | -15.278  | -13.5113 | 31.4791 | H  | -11.5611 | -8.6897  | 14.4225 |
| H  | -7.5994  | -1.1298 | 30.2852 | C  | -14.7378 | -14.7617 | 31.8208 | H  | -10.443  | -12.3424 | 16.4182 |
| H  | -7.7921  | -6.0611 | 30.5328 | C  | -15.3648 | -15.9345 | 31.3972 | H  | -14.3775 | -10.7359 | 16.9607 |
| H  | -5.2875  | -6.1281 | 30.9996 | C  | -16.5532 | -15.86   | 30.669  | C  | -0.5361  | -7.9527  | 19.4504 |
| H  | 0.9899   | -4.7578 | 31.3629 | C  | -17.1092 | -14.6194 | 30.3578 | C  | -1.3099  | -7.9988  | 18.2843 |
| H  | -0.3936  | -6.7883 | 30.9557 | C  | -16.4719 | -13.4459 | 30.7584 | C  | -2.1855  | -9.0594  | 18.0263 |

|    |          |         |         |    |          |          |         |   |          |          |         |
|----|----------|---------|---------|----|----------|----------|---------|---|----------|----------|---------|
| H  | -2.875   | -6.6155 | 30.8628 | N  | -13.54   | -14.7853 | 32.5298 | C | -2.3202  | -10.078  | 18.9724 |
| C  | -2.6624  | 0.3227  | 32.4764 | C  | -13.023  | -15.9934 | 32.9761 | C | -1.5818  | -10.054  | 20.1577 |
| H  | 0.0317   | -0.1686 | 32.2826 | C  | -13.6574 | -17.2508 | 32.5187 | C | -0.6773  | -9.0073  | 20.3601 |
| H  | 1.167    | -2.2565 | 31.7957 | C  | -14.7487 | -17.2261 | 31.7502 | H | -3.0429  | -10.8882 | 18.7888 |
| C  | -3.7689  | -1.5266 | 26.4427 | H  | -9.786   | -8.6212  | 31.6822 | H | -0.0518  | -9.0369  | 21.2621 |
| C  | -3.4659  | -2.757  | 26.8811 | H  | -10.1099 | -11.0026 | 32.4755 | H | -1.2294  | -7.1999  | 17.5338 |
| C  | -3.6938  | -3.087  | 28.3001 | H  | -14.0397 | -8.6131  | 30.6846 | H | -7.0496  | 4.428    | 16.7114 |
| N  | -4.1908  | -2.1514 | 29.179  | H  | -15.4515 | -10.6748 | 31.023  | H | -5.4506  | 5.2107   | 16.6412 |
| C  | -4.499   | -0.8931 | 28.7024 | H  | -17.0576 | -16.7827 | 30.339  | H | -5.572   | 3.5243   | 17.229  |
| C  | -4.3185  | -0.5584 | 27.4179 | H  | -18.0494 | -14.5667 | 29.7836 | H | -11.1643 | 6.7924   | 18.1312 |
| C  | -5.0289  | 0.0479  | 29.7107 | H  | -16.9124 | -12.4721 | 30.4895 | H | -9.6701  | 6.296    | 18.9639 |
| N  | -5.1387  | -0.3961 | 31.0055 | C  | -11.9161 | -16.1146 | 34.0123 | H | -11.2771 | 5.726    | 19.5643 |
| C  | -5.9972  | -0.0376 | 32.0319 | H  | -13.2498 | -18.2215 | 32.8481 | H | -3.5201  | 0.1377   | 33.1576 |
| C  | -6.1162  | -0.9742 | 33.0717 | H  | -15.2201 | -18.1698 | 31.43   | H | -1.933   | 0.9371   | 33.0488 |
| C  | -7.0394  | -0.7649 | 34.0974 | Zn | -12.6957 | -12.9723 | 32.3872 | H | -3.007   | 0.9409   | 31.6193 |
| C  | -7.8049  | 0.4022  | 34.1133 | C  | -10.1635 | -14.2823 | 26.7503 | H | -3.3465  | -3.8501  | 33.8815 |
| C  | -7.6571  | 1.3529  | 33.1037 | C  | -10.8669 | -14.8295 | 25.6723 | H | -4.25    | -4.4429  | 35.2973 |
| C  | -6.7586  | 1.1323  | 32.0609 | C  | -10.2434 | -15.122  | 24.4534 | H | -4.6589  | -5.0765  | 33.6746 |
| N  | -5.3497  | -2.1349 | 32.9981 | C  | -8.8674  | -14.8869 | 24.3471 | H | -21.257  | -2.0106  | 27.9276 |
| C  | -5.3727  | -3.0445 | 34.0463 | C  | -8.1296  | -14.3767 | 25.4186 | H | -22.4068 | -1.0951  | 26.9211 |
| C  | -6.3616  | -2.856  | 35.1323 | C  | -8.7911  | -14.0651 | 26.6088 | H | -21.0961 | -2.0176  | 26.1258 |
| C  | -7.1686  | -1.7928 | 35.1455 | H  | -8.3442  | -15.0828 | 23.3996 | H | -19.075  | 0.2044   | 30.505  |
| H  | -3.069   | -3.5248 | 26.1967 | H  | -8.2152  | -13.6501 | 27.45   | H | -19.1485 | -0.2803  | 32.2168 |
| H  | -3.4642  | -4.0969 | 28.6716 | H  | -11.9347 | -15.0548 | 25.8026 | H | -17.5672 | -0.2773  | 31.3802 |
| H  | -4.5675  | 0.4621  | 27.0853 | C  | -9.477   | -10.4046 | 14.7281 | H | 2.4694   | -13.2947 | 26.5723 |
| H  | -5.3008  | 1.0872  | 29.4672 | C  | -8.6891  | -11.4855 | 14.5977 | H | 0.7913   | -13.6694 | 27.0383 |
| H  | -8.5301  | 0.5762  | 34.9249 | C  | -7.3654  | -11.3517 | 13.9646 | H | 1.1556   | -12.1902 | 26.065  |
| H  | -8.2646  | 2.2732  | 33.1216 | N  | -6.924   | -10.1449 | 13.4783 | H | -0.5174  | -17.1669 | 25.7827 |
| H  | -6.6704  | 1.8792  | 31.2553 | C  | -7.7493  | -9.0471  | 13.6062 | H | -1.0702  | -18.2662 | 27.0707 |
| C  | -4.3554  | -4.1607 | 34.2265 | C  | -8.9473  | -9.1217  | 14.2029 | H | -2.2087  | -17.8054 | 25.7685 |
| H  | -6.4069  | -3.5792 | 35.9639 | C  | -7.2234  | -7.7995  | 13.0137 | H | -16.0833 | -12.5533 | 35.6132 |
| H  | -7.89    | -1.6571 | 35.9679 | N  | -6.0222  | -7.8678  | 12.3522 | H | -15.5084 | -13.5237 | 34.2347 |
| Zn | -4.6908  | -2.3279 | 31.113  | C  | -5.0576  | -6.9235  | 12.0438 | H | -15.8383 | -11.7574 | 34.0291 |
| C  | -13.9649 | -4.268  | 29.1428 | C  | -3.8114  | -7.4402  | 11.6529 | H | -11.9831 | -15.31   | 34.7752 |
| C  | -14.8904 | -4.922  | 28.4257 | C  | -2.7495  | -6.5743  | 11.3864 | H | -11.9814 | -17.0787 | 34.5632 |
| C  | -16.0972 | -4.2024 | 27.9837 | C  | -2.9407  | -5.1945  | 11.4769 | H | -10.9124 | -16.0764 | 33.5357 |
| N  | -16.3051 | -2.8849 | 28.3198 | C  | -4.1852  | -4.6801  | 11.8395 | H | -1.4921  | -10.9626 | 9.9732  |
| C  | -15.3159 | -2.2168 | 29.0145 | C  | -5.2423  | -5.5424  | 12.1261 | H | -3.2384  | -11.2208 | 10.2064 |
| C  | -14.2008 | -2.8342 | 29.43   | N  | -3.6635  | -8.8242  | 11.591  | H | -2.0895  | -11.4666 | 11.582  |
| C  | -15.5992 | -0.7925 | 29.2882 | C  | -2.4861  | -9.3725  | 11.0998 | H | -6.9146  | -8.2206  | 8.3982  |
| N  | -16.8108 | -0.296  | 28.8757 | C  | -1.3387  | -8.4741  | 10.836  | H | -5.6018  | -7.9926  | 9.5799  |
| C  | -17.2761 | 0.9745  | 28.5823 | C  | -1.4519  | -7.1539  | 10.9965 | H | -7.3272  | -7.8011  | 10.0879 |
| C  | -18.5145 | 1.0237  | 27.9211 | H  | -9.0032  | -12.4826 | 14.9417 | H | -19.0442 | -3.1942  | 12.5975 |
| C  | -19.038  | 2.2507  | 27.5106 | H  | -6.717   | -12.2345 | 13.8656 | H | -20.067  | -1.7651  | 12.8907 |
| C  | -18.3434 | 3.4288  | 27.7903 | H  | -9.5446  | -8.2016  | 14.286  | H | -18.4207 | -1.8189  | 13.5916 |
| C  | -17.1264 | 3.3826  | 28.4699 | H  | -7.7833  | -6.851   | 13.0281 | H | -20.8115 | -7.814   | 12.5236 |
| C  | -16.59   | 2.1571  | 28.8627 | H  | -2.1083  | -4.5061  | 11.2578 | H | -20.6182 | -6.5821  | 13.796  |

|    |          |         |         |    |          |          |         |   |          |          |         |
|----|----------|---------|---------|----|----------|----------|---------|---|----------|----------|---------|
| N  | -19.1621 | -0.1793 | 27.6473 | H  | -4.3309  | -3.589   | 11.907  | H | -19.8425 | -8.205   | 13.9769 |
| C  | -20.4307 | -0.1708 | 27.0841 | H  | -6.2168  | -5.1244  | 12.4266 | H | -16.8688 | -19.9839 | 21.9491 |
| C  | -20.995  | 1.1175  | 26.6208 | C  | -2.3232  | -10.831  | 10.7006 | H | -16.7837 | -18.6973 | 20.7199 |
| C  | -20.3284 | 2.2603  | 26.7987 | H  | -0.3886  | -8.8934  | 10.4642 | H | -16.1868 | -18.3921 | 22.3998 |
| H  | -14.76   | -5.981  | 28.1494 | H  | -0.5944  | -6.496   | 10.7799 | H | -14.5437 | -19.5791 | 17.5125 |
| H  | -16.8526 | -4.7259 | 27.3798 | C  | -2.9657  | -9.0998  | 16.7625 | H | -15.3499 | -19.4472 | 15.9302 |
| H  | -13.4592 | -2.2683 | 30.0159 | C  | -3.5978  | -8.0131  | 16.2977 | H | -13.8937 | -18.4584 | 16.2509 |
| H  | -14.9079 | -0.144  | 29.8495 | C  | -4.3368  | -8.105   | 15.0261 | C | -0.9367  | -1.436   | 22.2705 |
| H  | -18.756  | 4.4012  | 27.4755 | N  | -4.3633  | -9.2736  | 14.2999 | C | -0.9067  | -1.4557  | 20.927  |
| H  | -16.5823 | 4.3169  | 28.6878 | C  | -3.7143  | -10.3831 | 14.8057 | C | 0.3404   | -1.8106  | 20.2291 |
| H  | -15.6186 | 2.1313  | 29.3828 | C  | -3.0485  | -10.346  | 15.9684 | N | 1.4883   | -2.103   | 20.924  |
| C  | -21.3378 | -1.3891 | 27.0104 | C  | -3.7825  | -11.5896 | 13.9552 | C | 1.4137   | -2.1736  | 22.3008 |
| H  | -21.9948 | 1.1422  | 26.1553 | N  | -4.4211  | -11.4786 | 12.745  | C | 0.307    | -1.8295  | 22.9757 |
| H  | -20.7675 | 3.2137  | 26.4618 | C  | -5.0369  | -12.3962 | 11.9108 | C | 2.6301   | -2.6863  | 22.9649 |
| C  | -15.8222 | -1.3025 | 23.5486 | C  | -5.8618  | -11.846  | 10.916  | N | 3.6809   | -3.0707  | 22.1685 |
| C  | -15.5045 | -0.3354 | 24.4262 | C  | -6.5987  | -12.6847 | 10.0782 | C | 4.6531   | -4.0446  | 22.335  |
| C  | -16.1277 | -0.3283 | 25.7609 | C  | -6.4826  | -14.0697 | 10.2079 | C | 5.3104   | -4.4484  | 21.161  |
| N  | -17.0407 | -1.287  | 26.1263 | C  | -5.64    | -14.6167 | 11.1753 | C | 6.246    | -5.4832  | 21.201  |
| C  | -17.3809 | -2.2546 | 25.2049 | C  | -4.9202  | -13.7822 | 12.0291 | C | 6.5564   | -6.088   | 22.4199 |
| C  | -16.8213 | -2.3073 | 23.9883 | N  | -5.9626  | -10.4584 | 10.8395 | C | 5.9282   | -5.6675  | 23.592  |
| C  | -18.3888 | -3.2294 | 25.6717 | C  | -6.6921  | -9.8733  | 9.8137  | C | 4.9754   | -4.6502  | 23.5508 |
| N  | -18.8799 | -3.0826 | 26.9466 | C  | -7.4991  | -10.7431 | 8.9277  | N | 4.9514   | -3.8323  | 19.9659 |
| C  | -19.3747 | -4.0204 | 27.8397 | C  | -7.4764  | -12.0705 | 9.0662  | C | 5.6423   | -4.1248  | 18.7986 |
| C  | -19.3297 | -3.6521 | 29.1946 | H  | -3.5863  | -7.0635  | 16.8576 | C | 6.6219   | -5.2351  | 18.8123 |
| C  | -19.7258 | -4.5581 | 30.1799 | H  | -4.8789  | -7.2272  | 14.6449 | C | 6.8896   | -5.8964  | 19.9408 |
| C  | -20.2056 | -5.8159 | 29.8119 | H  | -2.5276  | -11.2492 | 16.325  | H | -1.797   | -1.2313  | 20.32   |
| C  | -20.2844 | -6.1705 | 28.4656 | H  | -3.2921  | -12.5379 | 14.2266 | H | 0.364    | -1.8317  | 19.1295 |
| C  | -19.8681 | -5.2762 | 27.4804 | H  | -7.0571  | -14.7366 | 9.5445  | H | 0.3282   | -1.8695  | 24.0753 |
| N  | -18.8274 | -2.3943 | 29.5162 | H  | -5.5528  | -15.7118 | 11.2731 | H | 2.7095   | -2.7932  | 24.0583 |
| C  | -18.8644 | -1.9481 | 30.8303 | H  | -4.2732  | -14.2262 | 12.8031 | H | 7.3009   | -6.8998  | 22.46   |
| C  | -19.2555 | -2.9012 | 31.8939 | C  | -6.6297  | -8.3958  | 9.459   | H | 6.1778   | -6.1491  | 24.5522 |
| C  | -19.6368 | -4.1441 | 31.5916 | H  | -8.0989  | -10.2946 | 8.1179  | H | 4.4734   | -4.341   | 24.4819 |
| H  | -14.795  | 0.4686  | 24.1789 | H  | -8.0713  | -12.7065 | 8.3903  | C | 5.5525   | -3.2949  | 17.5269 |
| H  | -15.8745 | 0.4663  | 26.478  | Zn | -5.2198  | -9.6743  | 12.5303 | H | 7.1678   | -5.4954  | 17.8898 |
| H  | -17.1155 | -3.1262 | 23.3151 | C  | -14.0871 | -8.464   | 15.46   | H | 7.6324   | -6.711   | 19.9401 |
| H  | -18.7553 | -4.0522 | 25.0376 | C  | -13.744  | -7.2673  | 14.9502 | C | 0.4181   | -6.8271  | 19.7206 |
| H  | -20.5279 | -6.5321 | 30.5853 | C  | -14.7778 | -6.2377  | 14.7375 | C | 0.944    | -6.6285  | 20.9424 |
| H  | -20.6678 | -7.1644 | 28.1805 | N  | -16.0995 | -6.4822  | 15.0221 | C | 1.8763   | -5.5112  | 21.1674 |
| H  | -19.9218 | -5.5759 | 26.4212 | C  | -16.4205 | -7.6771  | 15.6312 | N | 2.2412   | -4.669   | 20.1469 |
| C  | -18.648  | -0.5016 | 31.2485 | C  | -15.5153 | -8.6464  | 15.8204 | C | 1.6263   | -4.8304  | 18.9223 |
| H  | -19.2723 | -2.5713 | 32.9464 | C  | -17.8278 | -7.8029  | 16.0639 | C | 0.7947   | -5.8509  | 18.6682 |
| H  | -19.9415 | -4.8379 | 32.3923 | N  | -18.6658 | -6.7447  | 15.8183 | C | 1.9245   | -3.7756  | 17.9312 |
| Zn | -17.8577 | -1.6799 | 27.9133 | C  | -19.8064 | -6.2732  | 16.446  | N | 2.7327   | -2.7372  | 18.325  |
| C  | -12.7503 | -4.9614 | 29.6531 | C  | -20.2066 | -4.9814  | 16.0678 | C | 2.7639   | -1.4044  | 17.9446 |
| C  | -12.8365 | -6.2735 | 30.1252 | C  | -21.2954 | -4.374   | 16.6945 | C | 3.4146   | -0.5368  | 18.8375 |
| C  | -11.7254 | -6.952  | 30.6396 | C  | -22.0064 | -5.0701  | 17.6734 | C | 3.4349   | 0.8371   | 18.5925 |
| C  | -10.5132 | -6.2488 | 30.6939 | C  | -21.626  | -6.3634  | 18.0318 | C | 2.838    | 1.3422   | 17.4366 |

---

|   |          |          |         |   |          |         |         |    |        |         |         |
|---|----------|----------|---------|---|----------|---------|---------|----|--------|---------|---------|
| C | -10.38   | -4.9367  | 30.2176 | C | -20.5249 | -6.9643 | 17.4227 | C  | 2.2175 | 0.4798  | 16.5331 |
| C | -11.5155 | -4.3116  | 29.6894 | N | -19.4499 | -4.318  | 15.1056 | C  | 2.1774 | -0.8909 | 16.7863 |
| H | -9.6361  | -6.7295  | 31.1415 | C | -19.8712 | -3.0884 | 14.6201 | N  | 3.9747 | -1.0824 | 19.9884 |
| H | -11.4503 | -3.2926  | 29.2819 | C | -21.0102 | -2.4146 | 15.2846 | C  | 4.7187 | -0.2842 | 20.8456 |
| H | -13.8209 | -6.7581  | 30.1053 | C | -21.6675 | -3.0079 | 16.284  | C  | 4.7353 | 1.1787  | 20.6178 |
| C | -2.1854  | -1.0755  | 23.0126 | H | -12.7024 | -7.0154 | 14.701  | C  | 4.1065 | 1.7142  | 19.5688 |
| C | -2.3997  | -1.4805  | 24.3357 | H | -14.4971 | -5.2517 | 14.3377 | H  | 0.6933 | -7.2664 | 21.8025 |
| C | -3.5643  | -1.1257  | 25.0258 | H | -15.8608 | -9.5868 | 16.2732 | H  | 2.3043 | -5.3498 | 22.1679 |
| C | -4.5495  | -0.3895  | 24.3625 | H | -18.2233 | -8.706  | 16.5554 | H  | 0.3692 | -5.9323 | 17.6574 |
| C | -4.3752  | 0.0197   | 23.0385 | H | -22.8726 | -4.5994 | 18.1664 | H  | 1.5014 | -3.7796 | 16.9142 |
| C | -3.1775  | -0.3049  | 22.3954 | H | -22.1912 | -6.9078 | 18.8067 | H  | 2.8571 | 2.4253  | 17.2333 |
| H | -5.4881  | -0.1581  | 24.8892 | H | -20.222  | -7.979  | 17.7281 | H  | 1.7484 | 0.8849  | 15.6208 |
| H | -3.011   | 0.076    | 21.3782 | C | -19.3164 | -2.4365 | 13.3629 | H  | 1.6694 | -1.5583 | 16.0714 |
| H | -1.64    | -2.0803  | 24.8579 | H | -21.3479 | -1.4278 | 14.9256 | C  | 5.6272 | -0.8251 | 21.9392 |
| C | -6.6621  | -14.1768 | 25.2971 | H | -22.5237 | -2.5015 | 16.7592 | H  | 5.3064 | 1.8325  | 21.2984 |
| C | -6.0572  | -13.0927 | 25.8039 | C | -15.8733 | -2.9699 | 18.792  | H  | 4.1405 | 2.8034  | 19.4023 |
| C | -4.5939  | -12.9688 | 25.6838 | C | -16.5885 | -4.0753 | 19.0568 | Zn | 3.1953 | -2.9096 | 20.2492 |
| N | -3.8425  | -13.9624 | 25.1003 | C | -17.1975 | -4.8271 | 17.9443 | H  | 6.4848 | -3.3739 | 16.9254 |
| C | -4.4907  | -15.0493 | 24.5477 | N | -17.0702 | -4.4017 | 16.6429 | H  | 5.4132 | -2.2163 | 17.7533 |
| C | -5.8208  | -15.1908 | 24.6222 | C | -16.2781 | -3.3005 | 16.3872 | H  | 4.7149 | -3.6379 | 16.8812 |
| C | -3.6082  | -16.0534 | 23.9178 | C | -15.7171 | -2.5841 | 17.3701 | H  | 6.459  | -0.1204 | 22.1598 |
| N | -2.2539  | -15.846  | 23.9991 | C | -16.0941 | -2.9765 | 14.9576 | H  | 6.0983 | -1.7854 | 21.6395 |
| C | -1.1694  | -16.2548 | 23.2421 | N | -16.7216 | -3.7777 | 14.0372 | H  | 5.0675 | -0.9792 | 22.8874 |

---

## 11 References

1. Castilla, A. M.; Ousaka, N.; Bilbeisi, R. A.; Valeri, E.; Ronson, T. K.; Nitschke, J. R. High-fidelity stereochemical memory in a Fe<sup>II</sup><sub>4</sub>L<sub>4</sub> tetrahedral capsule. *J. Am. Chem. Soc.* **2013**, *135*, 17999–18006.
2. van der Waals radii in the book: Andrei, S. Batsanov. Small Molecule Applications of X-ray Diffraction. In *Encyclopedia of Spectroscopy and Spectrometry*, 2<sup>nd</sup> ed.; Lindon, J.C., Ed.; Academic Press: Oxford, UK, 2010; pp. 2550–2558.
3. Takezawa, H.; Murase, T.; Resnati, G.; Metrangolo, P.; Fujita, M. Recognition of polyfluorinated compounds through self-aggregation in a cavity. *J. Am. Chem. Soc.* **2014**, *136*, 1786–1788.
4. Allan, D.; Nowell, H.; Barnett, S.; Warren, M.; Wilcox, A.; Christensen, J.; Saunders, L.; Peach, A.; Hooper, M.; Zaja, L.; Patel, S.; Cahill, L.; Marshall, R.; Trimnell, S.; Foster, A.; Bates, T.; Lay, S.; Williams, M.; Hathaway, P.; Winter, G.; Gerstel, M.; Wooley, R. A novel dual air-bearing fixed- $\chi$  diffractometer for small-molecule single-crystal X-ray diffraction on beamline I19 at diamond light source. *Crystals* **2017**, *7*, 336.
5. (a) Winter, G. xia2: an expert system for macromolecular crystallography data reduction. *J. Appl. Crystallogr.* **2010**, *43*, 186–190; (b) Winter, G.; Waterman, D. G.; Parkhurst, J. M.; Brewster, A. S.; Gildea, R. J.; Gerstel, M.; Fuentes-Montero, L.; Vollmar, M.; Michels-Clark, T.; Young, I. D.; Sauter, N. K.; Evans, G. DIALS: implementation and evaluation of a new integration package. *Acta Crystallogr.* **2018**, *D74*, 85–97.
6. Farrugia, L., WinGX and ORTEP for Windows: an update. *J. Appl. Crystallogr.* **2012**, *45*, 849–854.
7. Sheldrick, G., SHELXT-integrated space-group and crystal-structure determination. *Acta Crystallogr.* **2015**, *A71*, 3–8.
8. Sheldrick, G. M. Crystal structure refinement with SHELXL. *Acta Crystallogr.* **2015**, *C71*, 3–8.
9. van der Sluis, P.; Spek, A. L. BYPASS: an effective method for the refinement of crystal structures containing disordered solvent regions. *Acta Crystallogr.* **1990**, *A46*,

194–201.

10. Spek, A. L. PLATON: A multipurpose crystallographic tool. Utrecht University: Utrecht, The Netherlands, 2008.

11. Stewart, J. J. P. Optimization of parameters for semiempirical methods VI: more modifications to the NDDO approximations and re-optimization of parameters. *J. Mol. Mod.* **2013**, *19*, 1–32.

12. Maglic, J. B.; Lavendomme, R. MoloVol: an easy-to-use program to calculate various volumes and surface areas of chemical structures and identify cavities. *J. Appl. Crystallogr.* **2022**, *55*, 1033–1044.

13. J. J. P. MOPAC2016; Stewart, Stewart Computational Chemistry: Colorado Springs, CO, USA, <http://openmopac.net/MOPAC2016.html> (accessed June 7, 2023).

14. (a) Fujitsu Ltd. *SCIGRESS*: Tokyo, Japan, 2013. (b) Stewart, J. J. P. Optimization of parameters for semiempirical methods V: modification of NDDO approximations and application to 70 elements. *J. Mol. Model.* **2007**, *13*, 1173–1213.
